# Supplementary material for: Decarbonylative/decarboxylative [4 + 2] annulation of phthalic anhydrides and cyclic iodoniums towards triphenylenes
Source: Royal Society of Chemistry journal article supplement (doi:10.1039/d2ob00500j), 2022-01-01

## Supporting Information

### **Decarbonylative/decarboxylative [4 + 2] annulation of phthalic anhydrides and cyclic iodoniums towards triphenylenes**

Lingyu Huang, ‡ Rongrong Xie, ‡ Chaoying Wen, Yanyan Yang, Yiwen Wang, Shiyan Ren, Bin Huang and Shiqing Li\*

*Guangxi Key Laboratory of Electrochemical and Magneto-Chemical Functional Materials, College of Chemistry and Bioengineering, Guilin University of Technology, Guilin 541004, P. R. China.*

*E-mail: [lisq@glut.edu.cn](mailto:lisq@glut.edu.cn)*

#### **Table of contents**

|                                                                                      |    |
|--------------------------------------------------------------------------------------|----|
| I. General remarks .....                                                             | 1  |
| II. General procedure for the synthesis of the cyclic diaryliodonium salts .....     | 1  |
| III. General procedure for the synthesis of triphenylenes .....                      | 3  |
| IV. Mechanistic studies .....                                                        | 4  |
| V. Experimental data for the described substances .....                              | 6  |
| VI. References .....                                                                 | 13 |
| VII. Copies of <sup>1</sup> H, <sup>13</sup> C and <sup>19</sup> F NMR spectra ..... | 15 |

## I. General remarks

NMR spectra were obtained on a BRUKER Ascend500 and Ascend400. The  $^1\text{H}$  NMR (500 MHz) chemical shifts were measured relative to  $\text{CDCl}_3$  or  $\text{DMSO-}d_6$  as the internal reference ( $\text{CDCl}_3$ :  $\delta = 7.26$  ppm;  $\text{DMSO-}d_6$ :  $\delta = 2.50$  ppm). The  $^{13}\text{C}$  NMR (125 MHz) chemical shifts were given using  $\text{CDCl}_3$  or  $\text{DMSO-}d_6$  the internal standard ( $\text{CDCl}_3$ :  $\delta = 77.16$  ppm;  $\text{DMSO-}d_6$ :  $\delta = 39.52$  ppm). High-resolution mass spectra (HR-MS) were obtained with a BRUKER solanX 70 FT-MS ( $\text{ESI}^+$ ). Melting points were determined with  $\text{SGW}^{\text{®}}$  X-4 and are uncorrected. The gas chromatography (GC) was detected with SHIMADZU GC-2014.

Unless otherwise noted, all reagents were obtained from commercial suppliers and used without further purification. Phthalic anhydride and palladium were purchased from Beijing InnoChem Science & Technology (China) Co., Ltd. TfoH and *m*-CPBA (purity of 75%) were purchased from Adamas-Beta Co., Ltd.

## II. General procedure for the synthesis of the cyclic diaryliodonium salts

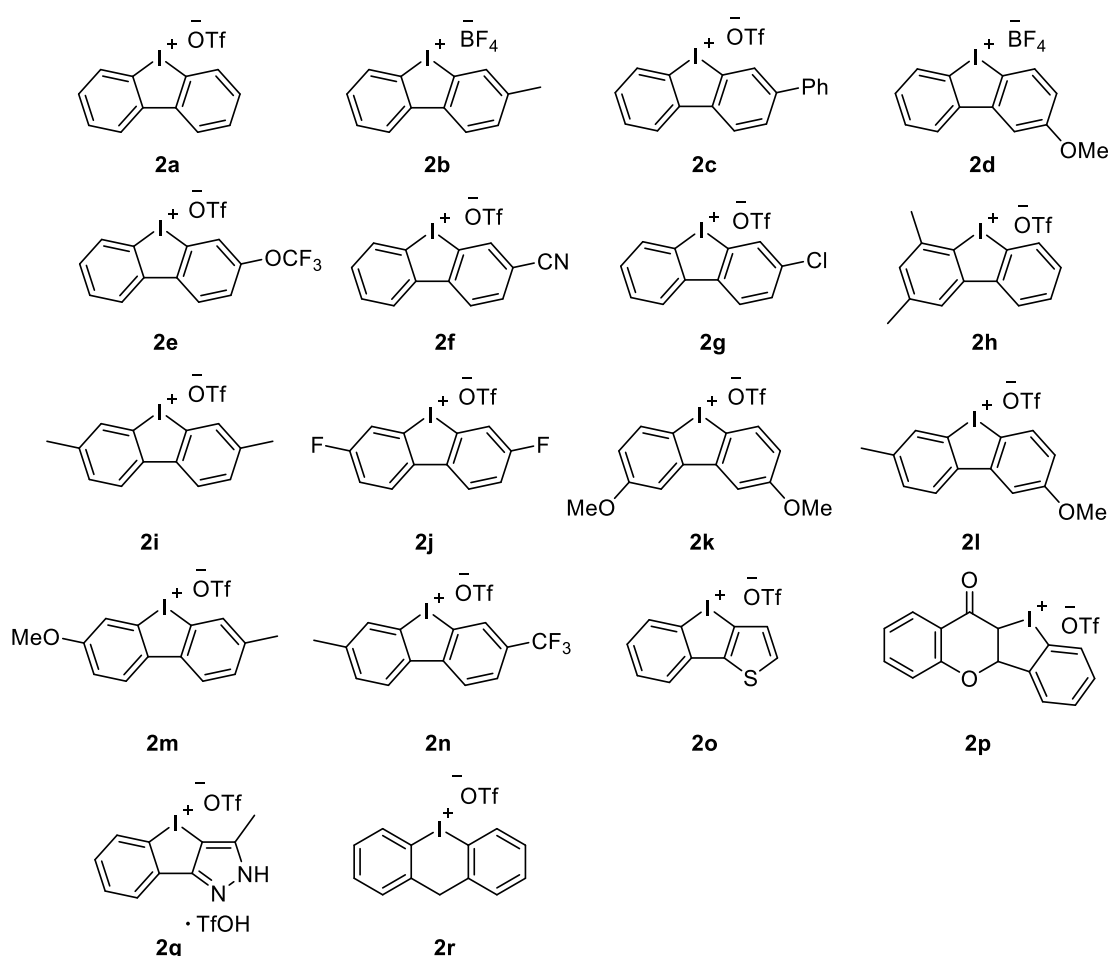

Compounds **2a-e**, **2g**, **2i-k** and **2o**;<sup>[1]</sup> **2f** and **2m**;<sup>[2]</sup> **2h**;<sup>[3]</sup> **2p**;<sup>[4a]</sup> **2q**<sup>[4b]</sup> and **2r**<sup>[4c]</sup> were prepared according to modified literature procedures. Compounds **2l** and **2n** are prepared as follows:

## General procedure for the preparation of 2-aminobiaryl derivatives (2')

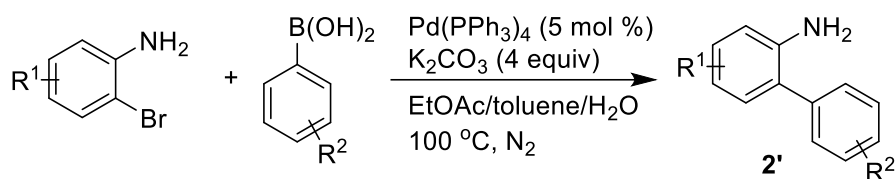

2-Bromonaniline derivatives (5 mmol, 1 equiv), arylboronic acids (7.5 mmol, 1.5 equiv),  $\text{K}_2\text{CO}_3$  (2.76 g, 20 mmol, 4 equiv),  $\text{Pd}(\text{PPh}_3)_4$  (289 mg, 5 mol %), EtOH (10 mL), toluene (20 mL) and  $\text{H}_2\text{O}$  (8 mL) were added to a round-bottom flask. The mixture was stirred at 100 °C for 16 h under nitrogen atmosphere. After being cooled down to room temperature, the mixture was extracted with EtOAc ( $3 \times 30$  mL). The combined organic phase was dried by  $\text{Na}_2\text{SO}_4$ , and filtered. After removal of volatile components from the filtrate, the resulting crude products was purified by column chromatography on a silica gel to afford the desired 2-aminobiaryl derivatives (2').

## General procedure for the preparation of 2-iodobiaryl (2'') from 2-aminobiaryl

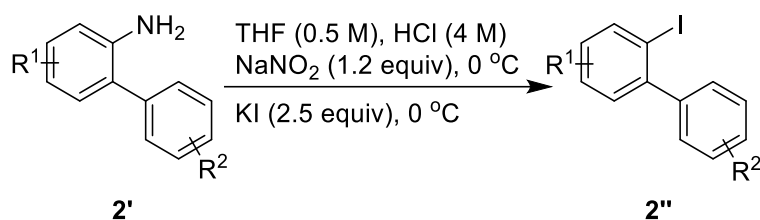

To a solution of 2' (5 mmol, 1 equiv) in THF (10 mL) was added 4 M aqueous HCl (10 mL). After cooled down to 0 °C in an ice water bath, an aqueous solution of  $\text{NaNO}_2$  (414 mg, 6 mmol, 1.2 equiv) in water (6 mL) was added dropwise. After 20 min stirring under the same temperature, a solution of KI (2.08 g, 12.5 mmol, 2.5 equiv) in  $\text{H}_2\text{O}$  (10 mL) was added. The reaction mixture was stirred at 0 °C for 10 min, then removed the ice water bath. The reaction was stirred overnight at room temperature before 1 M aqueous  $\text{Na}_2\text{S}_2\text{O}_3$  was added until the color of the mixture didn't change. The phases were separated, and the aqueous phase was extracted with EtOAc ( $3 \times 30$  mL). The combined organic layers were washed with  $\text{H}_2\text{O}$  ( $3 \times 10$  mL), dried over anhydrous  $\text{Na}_2\text{SO}_4$ , concentrated by rotary evaporation. The residue was purified by column chromatography on silica gel to afford the desired 2-iodobiaryl derivatives (2'').

## General procedure of the preparation of cyclic diaryliodonium salts (2)

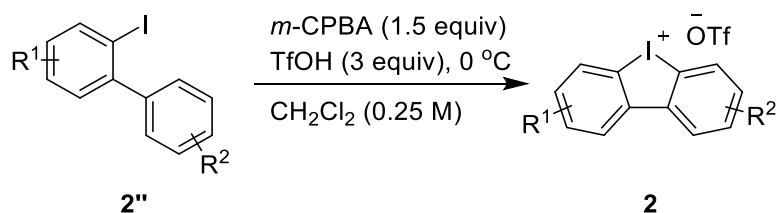

To a stirred solution of **2''** (5 mmol, 1 equiv) in CH<sub>2</sub>Cl<sub>2</sub> (20 mL) was added *m*-CPBA (1.73g, 75%, 7.5 mmol, 1.5 equiv), and TfOH (3 equiv) at ice-bath. The solution was stirred for 3 h at room temperature before CH<sub>2</sub>Cl<sub>2</sub> was removed by rotary evaporation. To the residue was added Et<sub>2</sub>O (20 mL), and the resulting mixture was stirred for 20 min. The solid precipitate was collected by vacuum filtration, washed with Et<sub>2</sub>O for three times, and dried under vacuum to afford cyclic diaryliodonium salt derivatives (**2**).

### 2-methoxy-7-methyldibenzo[*b,d*]iodol-5-ium triflate (**2l**)

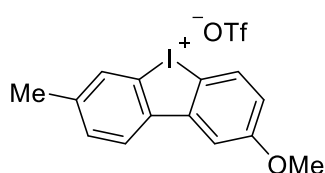

A gray solid (800 mg, 34% yield). M.p.: > 240 °C. <sup>1</sup>H NMR (500 MHz, DMSO-*d*<sub>6</sub>): δ = 8.12–8.38 (m, 1H), 8.01–7.95 (m, 3H), 7.65 (d, *J* = 7.5 Hz, 1H), 7.28–7.25 (m, 1H), 3.93 (s, 3H), 2.49 (s, 3H) ppm. <sup>13</sup>C NMR (125 MHz, DMSO-*d*<sub>6</sub>): δ = 161.63, 143.28, 141.62, 138.95, 131.60, 131.20, 130.28, 126.96, 121.83, 118.02, 111.24, 110.21, 56.12, 21.22 ppm. HRMS (ESI) *m/z*: calcd for C<sub>14</sub>H<sub>12</sub>IO<sup>+</sup> ([M-OTf]<sup>-</sup>) 322.9928, found 322.9925.

### 3-methyl-7-(trifluoromethyl)dibenzo[*b,d*]iodol-5-ium triflate (**2n**)

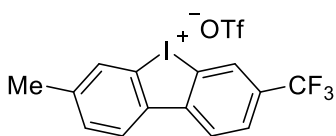

A white solid (1100 mg, 43% yield). M.p.: > 240 °C. <sup>1</sup>H NMR (500 MHz, DMSO-*d*<sub>6</sub>): δ = 8.62 (d, *J* = 8.0 Hz, 1H), 8.50–8.48 (m, 2H), 8.20 (d, *J* = 7.5 Hz, 2H), 8.01 (s, 1H), 7.72 (d, *J* = 7.5 Hz, 1H), 2.52 (s, 3H) ppm. <sup>13</sup>C NMR (125 MHz, DMSO-*d*<sub>6</sub>): δ = 146.11, 143.47, 138.17, 132.37, 130.80, 130.07 (d, *J*<sub>C-F</sub> = 32.6 Hz), 128.11, 127.95 (d, *J*<sub>C-F</sub> = 4.0 Hz), 127.72, 122.84 (q, *J*<sub>C-F</sub> = 168.6 Hz), 122.73, 122.42, 119.86, 21.79 ppm. HRMS (ESI) *m/z*: calcd for C<sub>14</sub>H<sub>9</sub>F<sub>3</sub>I<sup>+</sup> ([M-OTf]<sup>-</sup>) 360.9696, found 360.9697.

## III. General procedure for the synthesis of triphenylenes

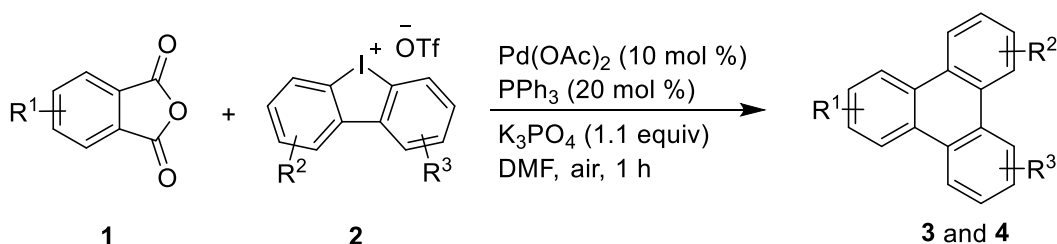

To a dry Schlenk tube containing a magnetic stir bar was added **1** (0.2 mmol), cyclic diaryliodonium salt **2** (0.2 mmol, 1 equiv), K<sub>3</sub>PO<sub>4</sub> (46.7 mg, 0.22 mmol, 1.1 equiv), Pd(OAc)<sub>2</sub> (4.5 mg, 10 mol %), PPh<sub>3</sub> (10.5 mg, 20 mol %) and DMF (1 mL). The mixture was stirred at 140 °C for 1 h under air. After being cooled down to room temperature, the mixture was purified by a silica gel column (200-300 mesh), eluting with petroleum ether/EtOAc (100/1→5/1, v/v) to afford products **3** and **4**.

#### IV. Mechanistic studies

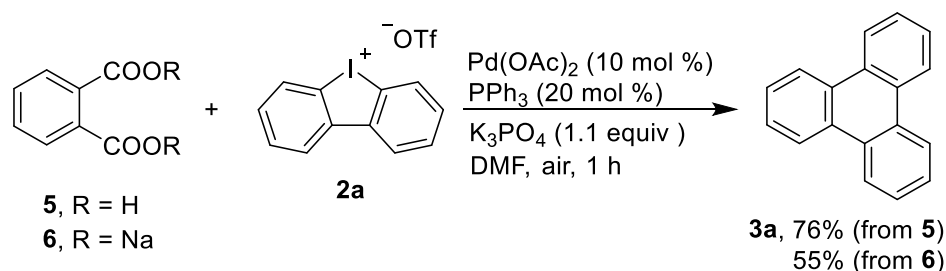

To a dry Schlenk tube with a magnetic stir bar was added **8** or **9** (0.2 mmol, 1 equiv), **2a** (0.2 mmol, 1 equiv),  $\text{K}_3\text{PO}_4$  (46.7 mg, 0.22 mmol, 1.1 equiv),  $\text{Pd}(\text{OAc})_2$  (4.5 mg, 10 mol %),  $\text{PPh}_3$  (10.5 mg, 20 mol %) and DMF (1.0 mL). The mixture was stirred at 140 °C for 1 h under air before it cooled down to room temperature. The mixture was purified by a silica gel column (200-300 mesh), eluting with petroleum ether to afford **3a** (35 mg, 76 % yield from **8**; 25 mg, 55 % yield from **9**).

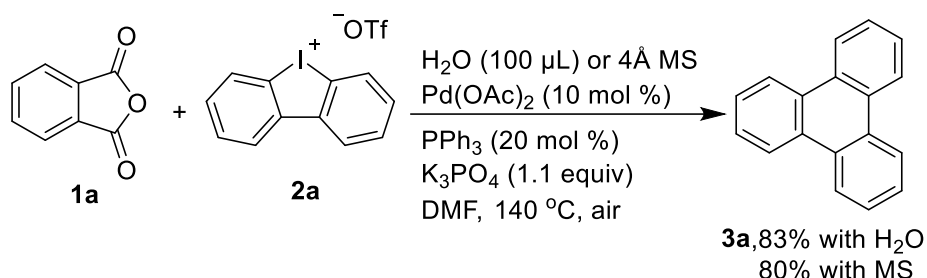

The mixture of **1a**, **2a** (0.2 mmol),  $\text{K}_3\text{PO}_4$  (46.7 mg, 0.22 mmol, 1.1 equiv),  $\text{Pd}(\text{OAc})_2$  (4.5 mg, 10 mol %),  $\text{PPh}_3$  (10.5 mg, 20 mol %), DMF (1.0 mL) and  $\text{H}_2\text{O}$  (100  $\mu\text{L}$ ) or 4 ÅMS (50 mg). The mixture was stirred at 140 °C for 1 h under air. After being cooled down to room temperature, and the mixture was purified by a silica gel column (200-300 mesh), eluting with petroleum ether to afford **3a** (38 mg, 83% with  $\text{H}_2\text{O}$ ; 37 mg, 80% with 4 ÅMS).

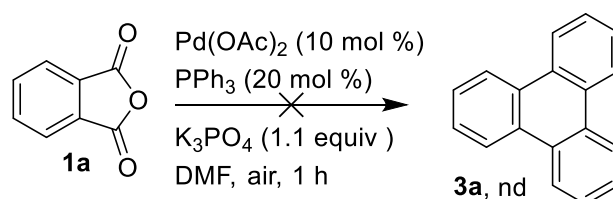

The mixture of **1a** (30 mg, 0.2 mmol),  $\text{K}_3\text{PO}_4$  (46.7 mg, 0.22 mmol, 1.1 equiv),  $\text{Pd}(\text{OAc})_2$  (4.5 mg, 10 mol %),  $\text{PPh}_3$  (10.5 mg, 20 mol %) and DMF (1.0 mL) were reacted at 140 °C for 1 h, triphenylene **3a** was not detected by thin-layer chromatography (TLC).

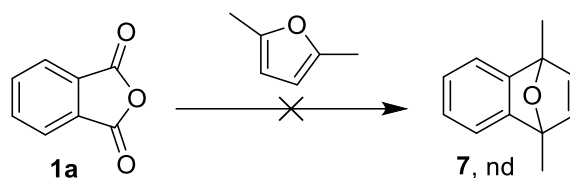

The DMF (1.0 mL) solution of **1a** (30 mg, 0.2 mmol), 2,5-dimethylfuran (21  $\mu$ L, 0.2 mmol),  $K_3PO_4$  (46.7 mg, 0.22 mmol, 1.1 equiv),  $Pd(OAc)_2$  (4.5 mg, 10 mol %) and  $PPh_3$  (10.5 mg, 20 mol %) was stirred at 140  $^\circ C$  for 1 h under air, Diels-Alder addition product **7** was not detected.

#### GC detection:

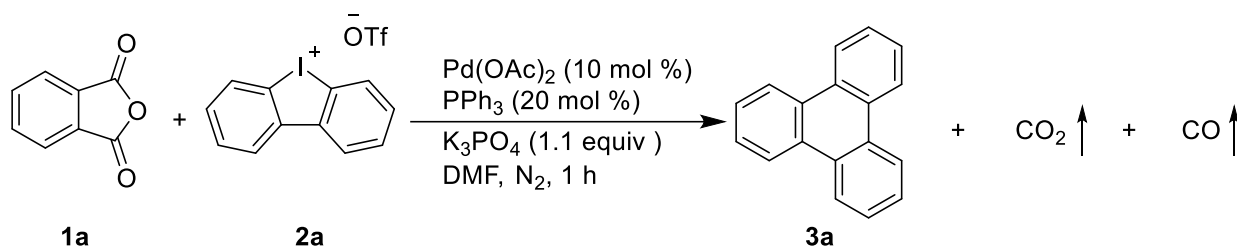

Two groups of parallel tests were conducted. Each dry Schlenk tube (25 mL) containing a magnetic stir bar was added **1a** (0.2 mmol), cyclic iodonium salt **2a** (0.2 mmol, 1 equiv),  $K_3PO_4$  (46.7 mg, 0.22 mmol, 1.1 equiv),  $Pd(OAc)_2$  (4.5 mg, 10 mol %),  $PPh_3$  (10.5 mg, 20 mol %), and DMF (1 mL). The tubes were filled with nitrogen. Before the reaction, 10 mL gas of one group was extracted and injected into a gas sampling bag filling with nitrogen for GC detection (*Figure S1*, a). The other group was stirred at 140  $^\circ C$  for 1 h before extracting 10 mL gas sample for GC analysis (*Figure S1*, b). Before the reaction, both  $CO_2$  and CO were not detected (*Figure S1*, a). After the reaction,  $CO_2$  was detected with retention time at 6.443 min, while CO was not detected (*Figure S1*, b).

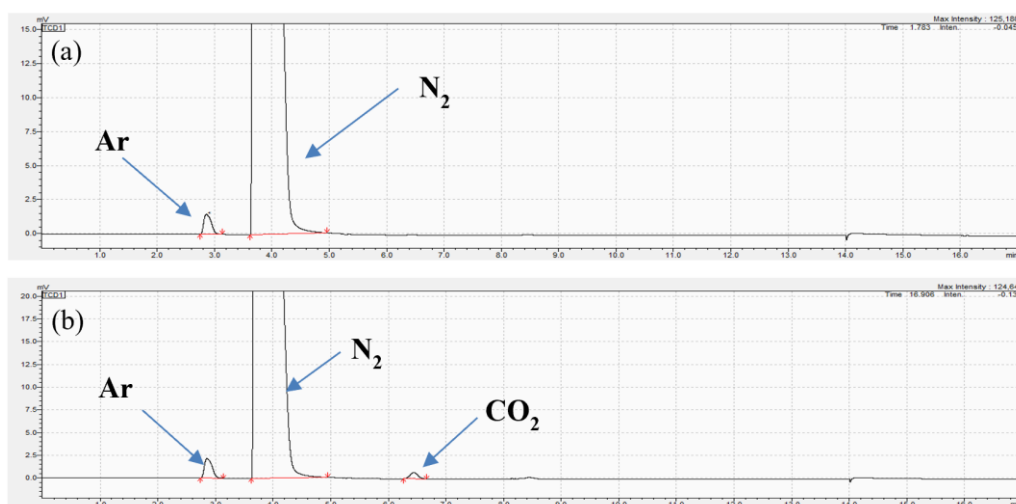

**Figure S1.** GC spectra of **1a** + **2a** (a) before and (b) after the reaction

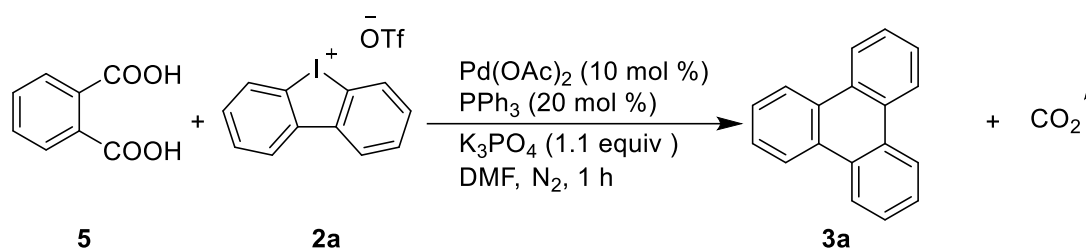

Two groups of parallel tests were conducted. Each dry Schlenk tube containing a magnetic stir bar was added phthalic acid **5** (0.2 mmol), cyclic diaryliodonium salt **2a** (0.2 mmol, 1 equiv),  $\text{K}_3\text{PO}_4$  (46.7 mg, 0.22 mmol, 1.1 equiv),  $\text{Pd(OAc)}_2$  (4.5 mg, 10 mol %),  $\text{PPh}_3$  (10.5 mg, 20 mol %), and DMF (1 mL). The tubes were filled with nitrogen. Before the reaction, 10 mL gas of one group was extracted and injected into a gas sampling bag filling with nitrogen for GC detection (*Figure S2*, a). The other group was stirred at 140 °C for 1 h before extracting 10 mL gas sample for GC analysis (*Figure S2*, b). Before the reaction, both  $\text{CO}_2$  and CO were not detected (*Figure S2*, a). After the reaction,  $\text{CO}_2$  was detected with retention time at 6.448 min (*Figure S2*, b).

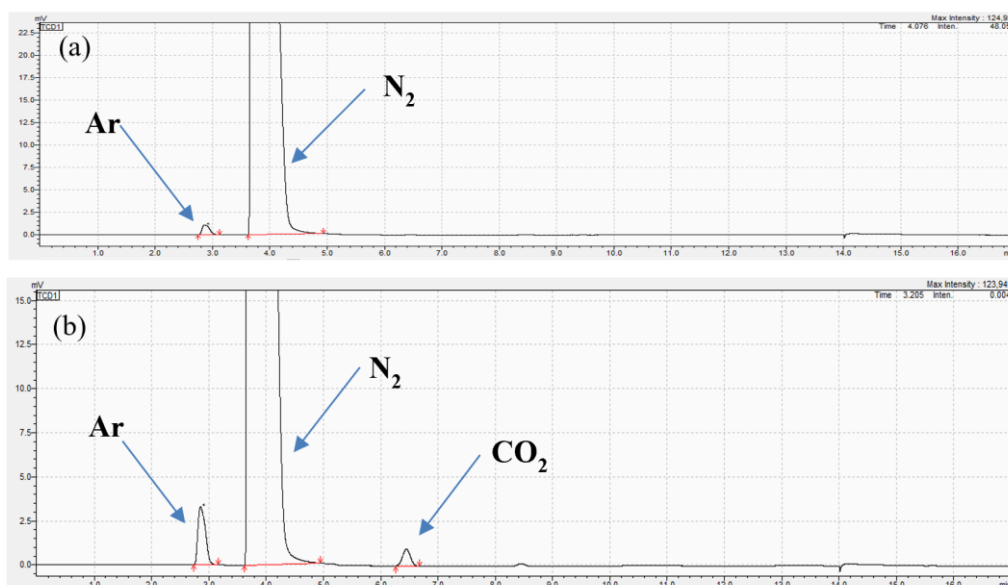

**Figure S2.** GC spectra of **5** + **2a** (a) before and (b) after the reaction

## V. Experimental data for the described substances

### triphenylene (**3a**)<sup>[2]</sup>

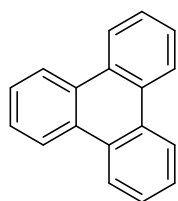

A white solid (41 mg, 90% yield), purification via a silica (200-300 mesh) gel column (petroleum ether, v).  $^1\text{H NMR}$  (500 MHz,  $\text{CDCl}_3$ ):  $\delta = 8.68\text{--}8.66$  (m, 6H),  $7.68\text{--}7.66$  (m, 6H) ppm.  $^{13}\text{C NMR}$  (125 MHz,  $\text{CDCl}_3$ ):  $\delta = 129.95, 127.37, 123.45$  ppm.

## 2-methyltriphenylene (3b and 4e)<sup>[2]</sup>

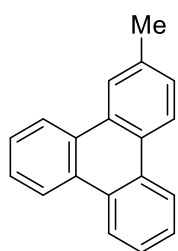

A white solid (**3b**: 44 mg, 92% yield; **4e**: 47 mg, 99% yield), purification via a silica (200-300 mesh) gel column (petroleum ether, v). **<sup>1</sup>H NMR (500 MHz, CDCl<sub>3</sub>):**  $\delta$  = 8.67–8.61 (m, 4H), 8.55 (d,  $J$  = 8.5 Hz, 1H), 8.45 (s, 1H), 7.67–7.62 (m, 4H), 7.49 (dd,  $J$  = 8.3 Hz, 1.3 Hz, 1H), 2.62 (s, 3H) ppm. **<sup>13</sup>C NMR (125 MHz, CDCl<sub>3</sub>):**  $\delta$  = 137.02, 130.04, 129.90, 129.84, 129.54, 128.83, 127.62, 127.30, 127.23, 126.92, 123.46, 123.43, 123.39, 123.22, 21.99 ppm.

## 2-phenyltriphenylene (3c)<sup>[2]</sup>

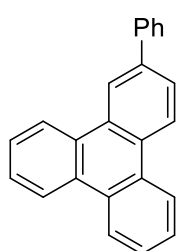

A white solid (28 mg, 46% yield), purification via a silica (200-300 mesh) gel column (petroleum ether, v). **<sup>1</sup>H NMR (500 MHz, CDCl<sub>3</sub>):**  $\delta$  = 8.86 (s, 1H), 8.75–8.67 (m, 5H), 7.91–7.90 (m, 1H), 7.82 (d,  $J$  = 7.5 Hz, 2H), 7.80 (s, 4H), 7.55 (t,  $J$  = 7.3 Hz, 2H), 7.46–7.43 (m, 1H) ppm. **<sup>13</sup>C NMR (125 MHz, CDCl<sub>3</sub>):**  $\delta$  = 141.44, 140.16, 130.34, 130.30, 130.07, 130.05, 129.88, 129.20, 128.94, 127.78, 127.68, 127.61, 127.56, 127.52, 127.50, 127.18, 126.63, 124.14, 123.65, 123.60, 123.59, 122.05 ppm.

## 2-methoxytriphenylene (3d and 4f)<sup>[2]</sup>

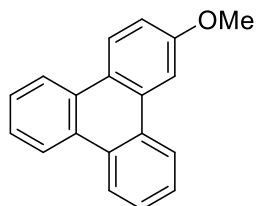

A white solid (**3d**: 50 mg, 96% yield; **4f**: 49 mg, 95% yield), purification via a silica (200-300 mesh) gel column (petroleum ether/EtOAc = 80/1, v/v). **<sup>1</sup>H NMR (500 MHz, CDCl<sub>3</sub>):**  $\delta$  = 8.67–8.63 (m, 2H), 8.59–8.55 (m, 3H), 8.06 (d,  $J$  = 2.5 Hz, 1H), 7.68–7.59 (m, 4H), 7.29 (dd,  $J$  = 9.0 Hz, 2.5 Hz, 1H), 4.04 (s, 3H) ppm. **<sup>13</sup>C NMR (125 MHz, CDCl<sub>3</sub>):**  $\delta$  = 159.08, 131.42, 130.37, 130.08, 129.64, 128.91, 127.47, 127.41, 127.20, 126.41, 125.11, 123.96, 123.54, 123.47, 123.43, 122.93, 116.00, 105.95, 55.63 ppm.

## 2-(trifluoromethoxy)triphenylene (3e)<sup>[5]</sup>

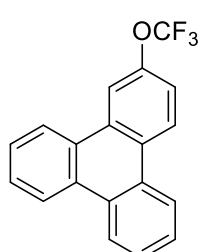

A white solid (26 mg, 41% yield), purification via a silica (200-300 mesh) gel column (petroleum ether, v). **<sup>1</sup>H NMR (500 MHz, CDCl<sub>3</sub>):**  $\delta$  = 8.69–8.66 (m, 3H), 8.61–8.60 (m, 1H), 8.57–8.55 (m, 1H), 8.45 (s, 1H), 7.73–7.67 (m, 4H), 7.52 (d,  $J$  = 9.0 Hz, 1H) ppm. **<sup>13</sup>C NMR (125 MHz, CDCl<sub>3</sub>):**  $\delta$  = 148.60, 131.45, 130.37, 129.90, 129.13, 129.00, 128.53, 128.20, 127.77, 127.69, 127.63, 125.43, 123.59, 123.52, 121.87, 120.21, 119.82, 115.35 ppm. **<sup>19</sup>F NMR (376 MHz, CDCl<sub>3</sub>):**  $\delta$  = -57.50 (s) ppm.



### triphenylene-2-carbonitrile (**3f**)<sup>[6]</sup>

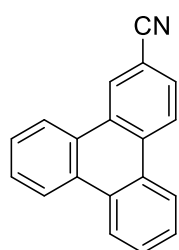

A white solid (49 mg, 96% yield), purification via a silica (200-300 mesh) gel column (petroleum ether/EtOAc = 80/1, v/v). **<sup>1</sup>H NMR (500 MHz, CDCl<sub>3</sub>):**  $\delta$  = 8.96 (d,  $J$ =1.0 Hz, 1H), 8.72 (d,  $J$  = 8.5 Hz, 1H), 8.69–8.67 (m, 2H), 8.64 (d,  $J$  = 8.0 Hz, 1H), 8.60 (dd,  $J$  = 7.0 Hz, 2.5 Hz, 1H), 7.86 (dd,  $J$  = 9.3 Hz, 1.5 Hz, 1H), 7.78–7.70 (m, 4H) ppm. **<sup>13</sup>C NMR (125 MHz, CDCl<sub>3</sub>):**  $\delta$  = 133.06, 130.95, 130.26, 130.11, 129.09, 129.04, 128.61, 128.49, 128.45, 128.33, 128.02, 127.88, 124.44, 124.06, 123.69, 123.63, 123.41, 119.50, 110.71 ppm.

### 2-chlorotriphenylene (**3g** and **4g**)<sup>[2]</sup>

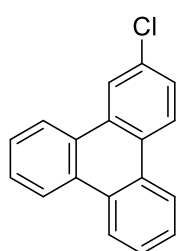

A white solid (**3g**: 31 mg, 59% yield; **4f**: 32 mg, 61% yield), purification via a silica (200-300 mesh) gel column (petroleum ether, v). **<sup>1</sup>H NMR (500 MHz, CDCl<sub>3</sub>):**  $\delta$  = 8.65–8.63 (m, 2H), 8.59–8.55 (m, 4H), 7.70–7.65 (m, 4H), 7.60–7.58 (m, 1H) ppm. **<sup>13</sup>C NMR (125 MHz, CDCl<sub>3</sub>):**  $\delta$  = 139.03, 133.51, 131.35, 130.28, 130.04, 129.81, 129.51, 129.25, 128.81, 128.34, 128.18, 128.00, 127.64, 127.58, 125.06, 123.51, 123.36, 123.21 ppm.

### 1,3-dimethyltriphenylene (**3h**)<sup>[7]</sup>

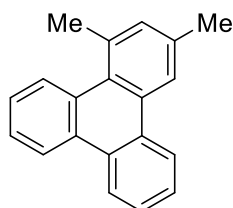

A white solid (30 mg, 59% yield), purification via a silica (200-300 mesh) gel column (petroleum ether, v). **<sup>1</sup>H NMR (500 MHz, CDCl<sub>3</sub>):**  $\delta$  = 8.64–8.58 (m, 4H), 8.34 (s, 1H), 7.62–7.55 (m, 4H), 7.35 (s, 1H), 3.03 (s, 3H), 3.57 (s, 3H) ppm. **<sup>13</sup>C NMR (125 MHz, CDCl<sub>3</sub>):**  $\delta$  = 135.93, 135.37, 133.30, 131.51, 130.98, 130.81, 130.46, 130.21, 128.38, 128.18, 127.29, 127.14, 126.32, 125.73, 123.78, 123.35, 123.18, 121.43, 26.70, 21.65 ppm.

### 2,7-dimethyltriphenylene (**3i**)<sup>[2]</sup>

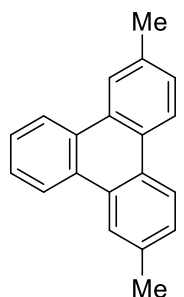

A white solid (26 mg, 51% yield), purification via a silica (200-300 mesh) gel column (petroleum ether, v). **<sup>1</sup>H NMR (500 MHz, CDCl<sub>3</sub>):**  $\delta$  = 8.68–8.63 (m, 2H), 8.51 (d,  $J$  = 8.0 Hz, 2H), 8.43 (s, 2H), 7.65–7.62 (m, 2H), 7.47 (dd,  $J$  = 8.3 Hz, 1.3 Hz, 2H), 2.61 (s, 6H) ppm. **<sup>13</sup>C NMR (125 MHz, CDCl<sub>3</sub>):**  $\delta$  = 136.53, 129.96, 129.52, 128.78, 127.72, 127.10, 123.41, 123.39, 123.16, 21.97 ppm.

### 2,7-difluorotriphenylene (3j)<sup>[2]</sup>

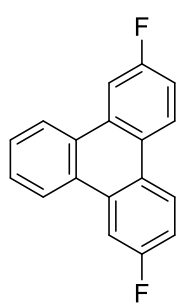

A white solid (28 mg, 53% yield), purification via a silica (200-300 mesh) gel column (petroleum ether, v). **<sup>1</sup>H NMR (500 MHz, CDCl<sub>3</sub>):**  $\delta$  = 8.55–8.51 (m, 4H), 8.26 (dd,  $J$  = 11.0 Hz, 2.0 Hz, 2H), 7.71–7.69 (m, 2H), 7.41–7.37 (m, 2H) ppm. **<sup>13</sup>C NMR (125 MHz, CDCl<sub>3</sub>):**  $\delta$  = 162.199 (d,  $J_{C-F}$  = 244.13 Hz), 131.42 (d,  $J_{C-F}$  = 8.6 Hz), 129.63, 128.12, 126.03, 125.54 (d,  $J_{C-F}$  = 9.3 Hz), 123.76, 115.87 (d,  $J_{C-F}$  = 22.9 Hz), 109.03 (d,  $J_{C-F}$  = 21.6 Hz) ppm. **<sup>19</sup>F NMR (376 MHz, CDCl<sub>3</sub>):**  $\delta$  = -114.27 (s) ppm.

### 2,11-dimethoxytriphenylene (3k)<sup>[8]</sup>

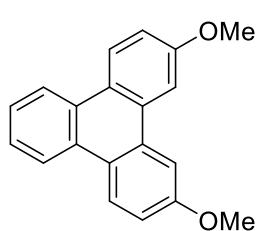

A white solid (38 mg, 66% yield), purification via a silica (200-300 mesh) gel column (petroleum ether/EtOAc = 60/1, v/v). **<sup>1</sup>H NMR (500 MHz, CDCl<sub>3</sub>):**  $\delta$  = 8.57 (d,  $J$  = 9.0 Hz, 2H), 8.54–8.52 (m, 2H), 7.97 (d,  $J$  = 2.5 Hz, 2H), 7.59–7.57 (m, 2H), 7.28 (dd,  $J$  = 13.0 Hz, 4.0 Hz, 2H), 4.03 (s, 6H) ppm. **<sup>13</sup>C NMR (125 MHz, CDCl<sub>3</sub>):**  $\delta$  = 158.92, 131.08, 129.04, 126.46, 125.18, 124.38, 122.89, 115.74, 106.34, 55.67 ppm.

### 6-methoxy-2-methyltriphenylene (3l)<sup>[9]</sup>

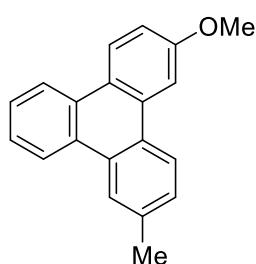

A white solid (54 mg, 99% yield), purification via a silica (200-300 mesh) gel column (petroleum ether/EtOAc = 100/1, v/v). **<sup>1</sup>H NMR (500 MHz, CDCl<sub>3</sub>):**  $\delta$  = 8.63 (d,  $J$  = 8.0 Hz, 1H), 8.56–8.55 (m, 2H), 8.47–8.45 (m, 2H), 8.02 (s, 1H), 7.64–7.57 (m, 2H), 7.48 (d,  $J$  = 8.5 Hz, 1H), 7.24 (s, 1H), 4.03 (s, 3H), 2.62 (s, 3H) ppm. **<sup>13</sup>C NMR (125 MHz, CDCl<sub>3</sub>):**  $\delta$  = 159.04, 137.15, 131.52, 130.34, 130.19, 128.81, 128.66, 127.34, 127.26, 126.28, 125.05, 123.59, 123.55, 123.41, 123.38, 122.91, 115.54, 105.71, 55.61, 22.00 ppm.

### 2-methoxy-7-methyltriphenylene (3m)<sup>[2]</sup>

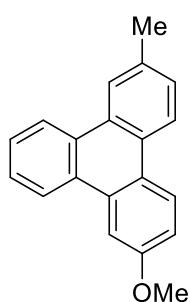

A white solid (16 mg, 30% yield), purification via a silica (200-300 mesh) gel column (petroleum ether/EtOAc = 100/1, v/v). **<sup>1</sup>H NMR (500 MHz, CDCl<sub>3</sub>):**  $\delta$  = 8.66–8.65 (m, 1H), 8.58–8.57 (m, 1H), 8.54 (d,  $J$  = 9.0 Hz, 1H), 8.45–8.42 (m, 2H), 8.04 (d,  $J$  = 2.5 Hz, 1H), 7.67–7.64 (m, 2H), 7.46 (d,  $J$  = 8.0 Hz, 1H), 7.73 (d,  $J$  = 2.5 Hz, 1H), 4.03 (s, 3H), 2.06 (s, 3H) ppm. **<sup>13</sup>C NMR (125 MHz, CDCl<sub>3</sub>):**  $\delta$  = 158.72, 135.96, 130.97, 130.26, 129.73, 128.87, 127.74, 127.33, 127.04, 124.84, 124.07, 123.49, 123.45, 123.41, 122.86, 115.94, 105.87, 55.62, 21.93 ppm.

### 2-methyl-7-(trifluoromethyl)triphenylene (3n)

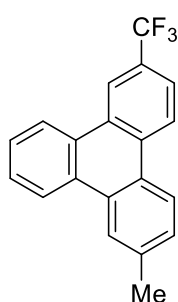

A white solid (36 mg, 58% yield), purification via a silica (200-300 mesh) gel column (petroleum ether, v). M.p.:119.2–121.2 °C.  $^1\text{H NMR}$  (500 MHz,  $\text{CDCl}_3$ ):  $\delta$  = 8.88 (s, 1H), 8.70–8.64 (m, 3H), 8.54 (d,  $J$  = 8.5), 8.46 (s, 1H), 7.84 (d,  $J$  = 9.0 Hz, 1H), 7.72–7.68 (m, 2H), 7.52 (d,  $J$  = 8.0 Hz, 1H), 2.64 (s, 3H) ppm.  $^{13}\text{C NMR}$  (125 MHz,  $\text{CDCl}_3$ ):  $\delta$  = 138.38, 133.86, 132.51, 130.63, 130.15, 129.41, 129.28, 129.19, 128.76, 128.50, 128.08, 127.64, 126.62, 125.83, 123.93 (d,  $J_{\text{C-F}}$  = 18.3 Hz), 123.63, 123.53 (d,  $J_{\text{C-F}}$  = 4.5 Hz), 123.28 (d,  $J_{\text{C-F}}$  = 3.5 Hz), 120.77 (q,  $J_{\text{C-F}}$  = 4.1 Hz), 22.06. ppm.  $^{19}\text{F NMR}$  (376 MHz,  $\text{CDCl}_3$ ):  $\delta$  = -62.01 (s) ppm. HRMS (ESI)  $m/z$ : calcd for  $\text{C}_{20}\text{H}_{14}\text{F}_3$  (M+H) 311.1048, found 311.1045.

### phenanthro[9,10-*b*]thiophene (3o)<sup>[5]</sup>

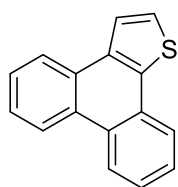

A white solid (17 mg, 36% yield). purification via a silica (200-300 mesh) gel column (petroleum ether, v).  $^1\text{H NMR}$  (500 MHz,  $\text{CDCl}_3$ ):  $\delta$  = 8.72–8.67 (m, 2H), 8.34–8.32 (m, 1H), 8.16–8.15 (m, 1H), 7.98 (d,  $J$  = 5.5 Hz, 1H), 7.68–7.62 (m, 4H), 7.57 (d,  $J$  = 5.5 Hz, 1H) ppm.  $^{13}\text{C NMR}$  (125 MHz,  $\text{CDCl}_3$ ):  $\delta$  = 136.79, 135.18, 129.21, 129.00, 128.77, 128.49, 127.38, 127.26, 126.50, 126.18, 125.10, 124.46, 124.44, 123.76, 123.65, 123.36 ppm.

### 14*H*-dibenzo[*a,c*]xanthen-14-one (3p)<sup>[10]</sup>

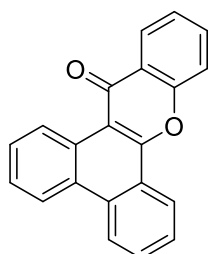

A yellow solid (28 mg, 48% yield), purification via a silica (200-300 mesh) gel column (petroleum ether/EtOAc = 40/1, v/v).  $^1\text{H NMR}$  (500 MHz,  $\text{CDCl}_3$ ):  $\delta$  = 10.20 (d,  $J$  = 8.5 Hz, 1H), 8.80 (d,  $J$  = 8.0 Hz, 1H), 8.73–8.69 (m, 2H), 8.48 (d,  $J$  = 8.0 Hz), 7.87 (t,  $J$  = 7.5 Hz, 1H), 7.79–7.77 (m, 3H), 7.73–7.70 (m, 2H), 7.50 (t,  $J$  = 7.5 Hz, 1H) ppm.  $^{13}\text{C NMR}$  (125 MHz,  $\text{CDCl}_3$ ):  $\delta$  = 178.55, 154.59, 134.10, 133.99, 130.82, 129.15, 128.75, 127.90, 127.67, 127.51, 126.87, 124.89, 124.29, 124.14, 123.09, 122.50, 117.67, 112.87 ppm.

### 1-fluorotriphenylene (4b)<sup>[11]</sup>

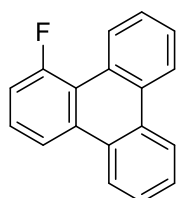

A white solid (34 mg, 69% yield). purification via a silica (200-300 mesh) gel column (petroleum ether, v).  $^1\text{H NMR}$  (500 MHz,  $\text{CDCl}_3$ ):  $\delta$  = 9.13–9.10 (m, 1H), 8.70–8.60 (m, 3H), 8.49 (d,  $J$  = 8.0 Hz, 1H), 7.71–7.65 (m, 4H), 7.62–7.57 (m, 1H), 7.41–7.36 (m, 1H) ppm.  $^{13}\text{C NMR}$  (125 MHz,  $\text{CDCl}_3$ ):  $\delta$  = 162.84, 160.84, 132.80 (d,  $J_{\text{C-F}}$  = 3.9 Hz), 130.22 (d,  $J_{\text{C-F}}$  = 4.0 Hz), 129.14 (d,  $J_{\text{C-F}}$  = 2.6 Hz), 128.51, 128.28, 127.86, 127.71 (d,  $J_{\text{C-F}}$  = 5.4 Hz), 127.47, 127.29, 127.21, 123.87, 123.39, 123.03, 119.16 (d,  $J_{\text{C-F}}$  = 3.4 Hz), 114.70, 114.49 ppm.  $^{19}\text{F NMR}$  (471 MHz,  $\text{CDCl}_3$ ):  $\delta$  = -108.32 (s) ppm.

### 1-nitrotriphenylene (4c)<sup>[6]</sup>

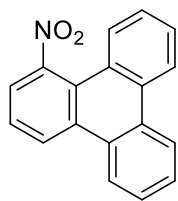

A yellow solid (36 mg, 66% yield). purification via a silica (200-300 mesh) gel column (petroleum ether/EtOAc = 60/1, v/v). **<sup>1</sup>H NMR (500 MHz, CDCl<sub>3</sub>):**  $\delta$  = 8.80 (d,  $J$  = 8.0 Hz, 1H), 8.64 (d,  $J$  = 8.5 Hz, 2H), 8.59 (d,  $J$  = 7.5 Hz, 1H), 8.03 (d,  $J$  = 8.5 Hz, 1H), 7.83 (d,  $J$  = 7.5 Hz, 1H), 7.72–7.67 (m, 4H), 7.54 (t,  $J$  = 7.5 Hz, 1H) ppm. **<sup>13</sup>C NMR (125 MHz, CDCl<sub>3</sub>):**  $\delta$  = 132.61, 131.19, 130.53, 129.18, 128.88, 128.77, 128.31, 128.08, 127.25, 126.63, 126.55, 126.43, 125.46, 123.87, 123.72, 123.61, 123.43, 122.57 ppm.

### N-(triphenylen-1-yl)acetamide (4d)

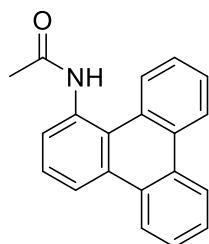

A white solid (56 mg, 98% yield). purification via a silica (200-300 mesh) gel column (petroleum ether/EtOAc = 5/1, v/v). M.p.: 225.6–227.6 °C. **<sup>1</sup>H NMR (500 MHz, DMSO-*d*<sub>6</sub>):**  $\delta$  = 10.29 (s, 1H), 9.02 (d,  $J$  = 8.0 Hz, 1H), 8.75–8.73 (m, 3H), 8.67 (d,  $J$  = 8.0 Hz, 1H), 7.70–7.58 (m, 6H), 2.16 (s, 3H) ppm. **<sup>13</sup>C NMR (125 MHz, DMSO-*d*<sub>6</sub>):**  $\delta$  = 168.44, 135.00, 131.14, 129.88, 129.39, 129.28, 128.98, 127.78, 127.73, 127.69, 127.35, 126.96, 126.54, 126.28, 125.18, 123.91, 123.63, 123.38, 121.24, 23.42 ppm. **HRMS (ESI)  $m/z$ :** calcd for C<sub>20</sub>H<sub>16</sub>NO (M+H) 286.1232, found 286.1235.

### 2-(phenylethynyl)triphenylene (4h)<sup>[12]</sup>

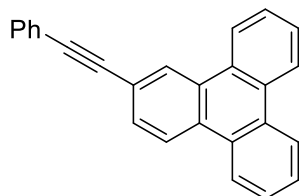

A white solid (20 mg, 30% yield). purification via a silica (200-300 mesh) gel column (petroleum ether/EtOAc = 40/1, v/v). **<sup>1</sup>H NMR (500 MHz, CDCl<sub>3</sub>):**  $\delta$  = 8.84 (s, 1H), 8.67–8.60 (m, 5H), 7.80–7.78 (m, 1H), 7.69–7.63 (m, 6H), 7.42–7.38 (m, 3H) ppm. **<sup>13</sup>C NMR (125 MHz, CDCl<sub>3</sub>):**  $\delta$  = 131.86, 130.21, 130.13, 130.08, 129.88, 129.70, 129.47, 129.27, 128.59, 128.55, 127.74, 127.53, 127.51, 126.99, 123.66, 123.59, 123.57, 123.51, 123.46, 123.42, 122.08, 90.36, 89.99 ppm.

### 2,6,11-trimethyltriphenylene (4i)<sup>[13]</sup>

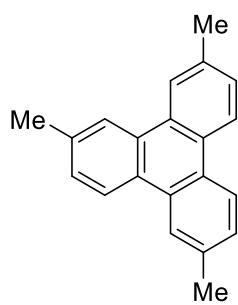

A white solid (40 mg, 74% yield). purification via a silica (200-300 mesh) gel column (petroleum ether, v). **<sup>1</sup>H NMR (500 MHz, CDCl<sub>3</sub>):**  $\delta$  = 8.53 (d,  $J$  = 8.5 Hz, 1H), 8.50–8.48 (m, 2H), 8.43 (s, 2H), 8.39 (s, 1H), 7.47–7.43 (m, 3H), 2.62–2.60 (m, 9H) ppm. **<sup>13</sup>C NMR (125 MHz, CDCl<sub>3</sub>):**  $\delta$  = 136.72, 136.45, 136.38, 129.94, 129.64, 129.45, 128.63, 128.57, 128.33, 127.86, 127.66, 127.36, 123.40, 123.34, 123.18, 123.16, 123.12, 21.96 ppm.

### 2-chloro-6,11-dimethyltriphenylene (4j)

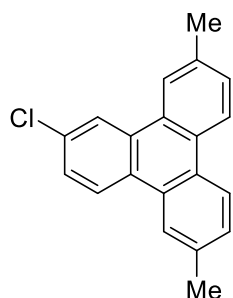

A white solid (44 mg, 76% yield). purification via a silica (200-300 mesh) gel column (petroleum ether, v). M.p.: 158.7–160.7 °C.  $^1\text{H NMR}$  (500 MHz,  $\text{CDCl}_3$ ):  $\delta$  = 8.57 (s, 1H), 8.54 (d,  $J$  = 9.0 Hz, 1H), 8.48 (d,  $J$  = 8.0 Hz, 2H), 8.33 (d,  $J$  = 12.5 Hz, 2H), 7.57 (dd,  $J$  = 9.0 Hz, 2.0 Hz, 1H), 7.50 (t,  $J$  = 8.0 Hz, 2H), 2.61 (s, 3H), 2.60 (s, 3H) ppm.  $^{13}\text{C NMR}$  (125 MHz,  $\text{CDCl}_3$ ):  $\delta$  = 136.82, 133.23, 131.41, 129.42, 129.06, 128.87, 128.43, 128.39, 128.10, 127.63, 127.28, 125.03, 123.45, 123.32, 123.24, 123.14, 21.94, 21.91 ppm. **HRMS (ESI)  $m/z$** : calcd for  $\text{C}_{20}\text{H}_{16}\text{Cl}$  ( $\text{M}+\text{H}$ ) 291.0941, found 291.0940.

### 2,6,11-trimethoxytriphenylene (4k)<sup>[14]</sup>

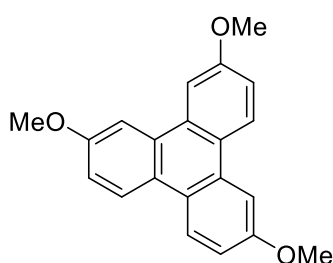

A white solid (32 mg, 50% yield). purification via a silica (200-300 mesh) gel column (petroleum ether/EtOAc = 60/1, v/v).  $^1\text{H NMR}$  (500 MHz,  $\text{CDCl}_3$ ):  $\delta$  = 8.50–8.43 (m, 3H), 7.96–7.93 (m, 3H), 7.28–7.25 (m, 3H), 7.20 (dd,  $J$  = 9.0 Hz, 2.5 Hz, 1H), 4.03–4.01 (m, 9H) ppm.  $^{13}\text{C NMR}$  (125 MHz,  $\text{CDCl}_3$ ):  $\delta$  = 158.99, 158.43, 158.22, 131.53, 130.42, 129.95, 128.99, 125.22, 124.60, 124.55, 124.49, 124.09, 123.12, 115.83, 115.63, 115.07, 106.33, 105.48, 55.68, 55.67, 55.61 ppm.

### 6-chloro-2,11-dimethoxytriphenylene (4l)

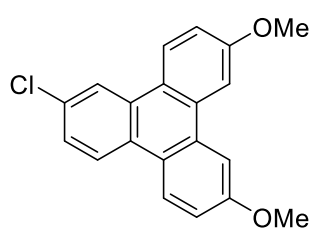

A white solid (30 mg, 46% yield). purification via a silica (200-300 mesh) gel column (petroleum ether/EtOAc = 60/1, v/v). M.p.: 150.3–153.3 °C.  $^1\text{H NMR}$  (500 MHz,  $\text{CDCl}_3$ ):  $\delta$  = 8.50–8.42 (m, 4H), 7.95 (s, 1H), 7.50 (dd,  $J$  = 9.0 Hz, 2.0 Hz, 1H), 7.30–7.27 (m, 2H), 4.03 (d,  $J$  = 1.5 Hz, 6H) ppm.  $^{13}\text{C NMR}$  (125 MHz,  $\text{CDCl}_3$ ):  $\delta$  = 159.38, 159.11, 132.50, 131.52, 131.00, 130.46, 127.46, 126.63, 125.30, 125.13, 124.50, 123.69, 123.25, 122.62, 115.99, 115.90, 106.44, 106.41, 55.69 ppm. **HRMS (ESI)  $m/z$** : calcd for  $\text{C}_{20}\text{H}_{16}\text{ClO}_2$  ( $\text{M}+\text{H}$ ) 323.0839, found 323.0840.

### 2-methoxy-11-methyltriphenylene and 2-methoxy-6-methyltriphenylene (4m and 4m')

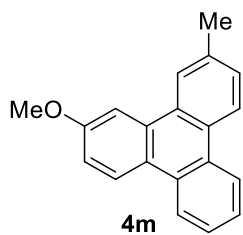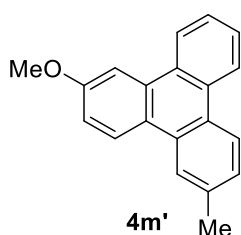

A white solid (24 mg, with a ratio of 1/1) purification via a silica (200-300 mesh) gel column (petroleum ether, v).  $^1\text{H NMR}$  (500 MHz,  $\text{CDCl}_3$ ):  $\delta$  = 8.62–8.50 (m, 4H), 8.35 (s, 1H), 8.05–8.04 (m, 1H), 7.66–7.57 (m, 2H), 7.48 (d,  $J$  = 8.5 Hz, 0.5H), 7.43 (d,  $J$  = 8.0 Hz, 0.5H), 7.27–7.26 (m, 0.9H, cover the solvent), 4.04 (d,  $J$  = 6.0 Hz, 3H), 2.61 (d,  $J$  = 9.0 Hz, 3H) ppm.  $^{13}\text{C NMR}$  (125 MHz,

**CDCl<sub>3</sub>**):  $\delta$  = 158.97, 158.94, 137.04, 136.83, 131.51, 131.30, 130.46, 130.03, 129.67, 129.59, 129.24, 129.00, 128.94, 128.03, 127.88, 127.39, 126.95, 126.73, 126.60, 126.33, 125.07, 125.03, 124.06, 123.85, 123.47, 123.42, 123.40, 123.35, 123.30, 123.18, 122.93, 122.86, 115.86, 115.83, 105.88, 105.87, 55.64, 55.59, 21.99, 21.97 ppm. **HRMS (ESI) *m/z***: calcd for C<sub>20</sub>H<sub>17</sub>O (M+H) 273.1279, found 273.1278.

### 1,3-dimethyl-9-nitrotriphenylene (4n)

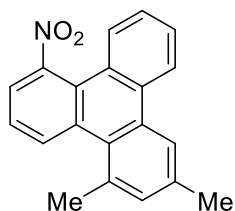

A yellow solid (47 mg, 78% yield). purification via a silica (200-300 mesh) gel column (petroleum ether, v). M.p.: 120.1–122.1 °C. **<sup>1</sup>H NMR (500 MHz, CDCl<sub>3</sub>)**:  $\delta$  = 8.67 (d, *J* = 8.0 Hz, 1H), 8.53 (d, *J* = 8.5 Hz, 1H), 8.27 (s, 1H), 7.96 (d, *J* = 8.0 Hz, 1H), 7.76–7.75 (m, 1H), 7.64 (t, *J* = 7.8 Hz, 1H), 7.58 (t, *J* = 8.0 Hz, 1H), 7.49–7.46 (m, 1H), 7.37 (s, 1H), 2.96 (s, 3H), 2.57 (s, 3H) ppm. **<sup>13</sup>C NMR (125 MHz, CDCl<sub>3</sub>)**:  $\delta$  = 149.79, 137.58, 135.24, 133.94, 133.47, 132.11, 131.76, 130.85, 128.81, 126.91, 126.83, 126.27, 125.50, 124.96, 124.28, 123.32, 122.28, 121.56, 26.33, 21.68 ppm. **HRMS (ESI) *m/z***: calcd for C<sub>20</sub>H<sub>16</sub>NO<sub>2</sub> (M+H) 302.1181, found 302.1180.

## VI. References

- [1] Xie, R.; Lv, H.; Ye, X.; Kong, X.; Li, S. Cu-Catalyzed Tandem N-arylation of Phthalhydrazides with Cyclic Iodoniums to Yield Dihydrobenzo[*c*]cinnolines. *Org. Biomol. Chem.* **2020**, *18*, 4824–4830.
- [2] Yang, S.; Wang, F.; Wu, Y.; Hua, W.; Zhang, F. Synthesis of Functionalized Triphenylenes via a Traceless Directing Group Strategy. *Org. Lett.* **2018**, *20*, 1491–1495.
- [3] Wu, B.; Yoshikai, N. Conversion of 2-Iodobiarlyls into 2,2'-Diiodobiarlyls via Oxidation-Iodination Sequences: A Versatile Route to Ladder-Type Heterofluorenes. *Angew. Chem.* **2015**, *127*, 8860–8863.
- [4] (a) Zhu, D.; Wu, Z.; Luo, B.; Du, Y.; Liu, P.; Chen, Y.; Hu, Y.; Huang, P.; Wen, S. Heterocyclic Iodoniums for the Assembly of Oxygen-Bridged Polycyclic Heteroarenes with Water as the Oxygen Source. *Org. Lett.* **2018**, *20*, 4815–4818; (b) Boelke, A.; Kuczmera, T. J.; Caspers, L. D.; Lork, E. L.; Nachtsheim, B. J. Iodolopyrazolium Salts: Synthesis, Derivatizations, and Applications. *Org. Lett.* **2020**, *22*, 7261–7266; (c) Peng, X.; Sun, Z.; Kuang, P.; Li, L.; Chen, J.; Chen, J. Copper-Catalyzed Selective Arylation of Nitriles with Cyclic Diaryl Iodonium Salts: Direct Access to Structurally Diversified Diarylmethane Amides with Potential Neuroprotective and Anticancer Activities. *Org. Lett.* **2020**, *22*, 5789–5795.
- [5] Yin, S.; Wang, X.; Jiang, J.; Xiao, H.; Li, X. Synthesis of Terpyridine-Containing Pd(II) Complexes and Evaluation of Their Catalytic Activity. *J. Mol. Struct.* **2019**, *1198*, 126925.

- [6] Hu, T.; Xu, K.; Ye, Z.; Zhu, K.; Wu, Y.; Zhang, F. Two-in-One Strategy for the Pd(II)-Catalyzed Tandem C–H Arylation/Decarboxylative Annulation Involved with Cyclic Diaryliodonium Salts. *Org. Lett.* **2019**, *21*, 7233–7237.
- [7] Lee, J. B.; Jeon, M. H.; Seo, J. K.; von Helden, G.; Rohde, J.-U.; Zhao, B. S.; Seo, J.; Hong, S. Y. Annulative  $\pi$ -Extension of Unactivated Benzene Derivatives through Nondirected C–H Arylation. *Org. Lett.*, **2019**, *21*, 7004–7008.
- [8] Nagao, I.; Shimizu, M.; Hiyama, T. 9-Stannafluorenes: 1,4-Dimetal Equivalents for Aromatic Annulation by Double Cross-Coupling. *Angew. Chem., Int. Ed.* **2009**, *48*, 7573–7576.
- [9] Zhou, J.; Yang, W.; Wang, B.; Ren, H. Friedel–Crafts Arylation for the Formation of C<sub>sp2</sub>-C<sub>sp3</sub> Bonds: A Route to Unsymmetrical and Functionalized Polycyclic Aromatic Hydrocarbons from Aryl Triazenes. *Angew. Chem., Int. Ed.* **2012**, *51*, 12293–12297.
- [10] Yang, J.; Yoshikai, N. Cobalt-Catalyzed Annulation of Salicylaldehydes and Alkynes to Form Chromones and 4-Chromanones. *Angew. Chem., Int. Ed.* **2016**, *55*, 2870–2874.
- [11] Pan, S.; Jiang, H.; Zhang, Y.; Chen, D.; Zhang, Y. Synthesis of Triphenylenes Starting from 2-Iodobiphenyls and Iodobenzenes via Palladium-Catalyzed Dual C–H Activation and Double C–C Bond Formation. *Org. Lett.*, **2016**, *18*, 5192–5195.
- [12] Nandy, R.; Sankararaman, S. Donor-Acceptor Substituted Phenylethynyltriphenylenes – Excited State Intramolecular Charge Transfer, Solvatochromic Absorption and Fluorescence Emission. *Beilstein J. Org. Chem.*, **2010**, *6*, 992–1001.
- [13] Chen, L.; Zhang, C.; Wen, C.; Zhang, K.; Liu, W.; Chen, Q. Gold-Catalyzed Cyclotrimerization of Arynes for The Synthesis of Triphenylenes. *Catal. Commun.*, **2015**, *65*, 81–84.
- [14] Cant, A. A.; Roberts, L.; Greaney, M. F. Generation of Benzyne from Benzoic Acid Using C–H Activation. *Chem. Commun.*, **2010**, *46*, 8671–8673.

## VII. Copies of $^1\text{H}$ , $^{13}\text{C}$ and $^{19}\text{F}$ NMR spectra

$^1\text{H}$  NMR (500 MHz,  $\text{DMSO-}d_6$ ) of **2I**

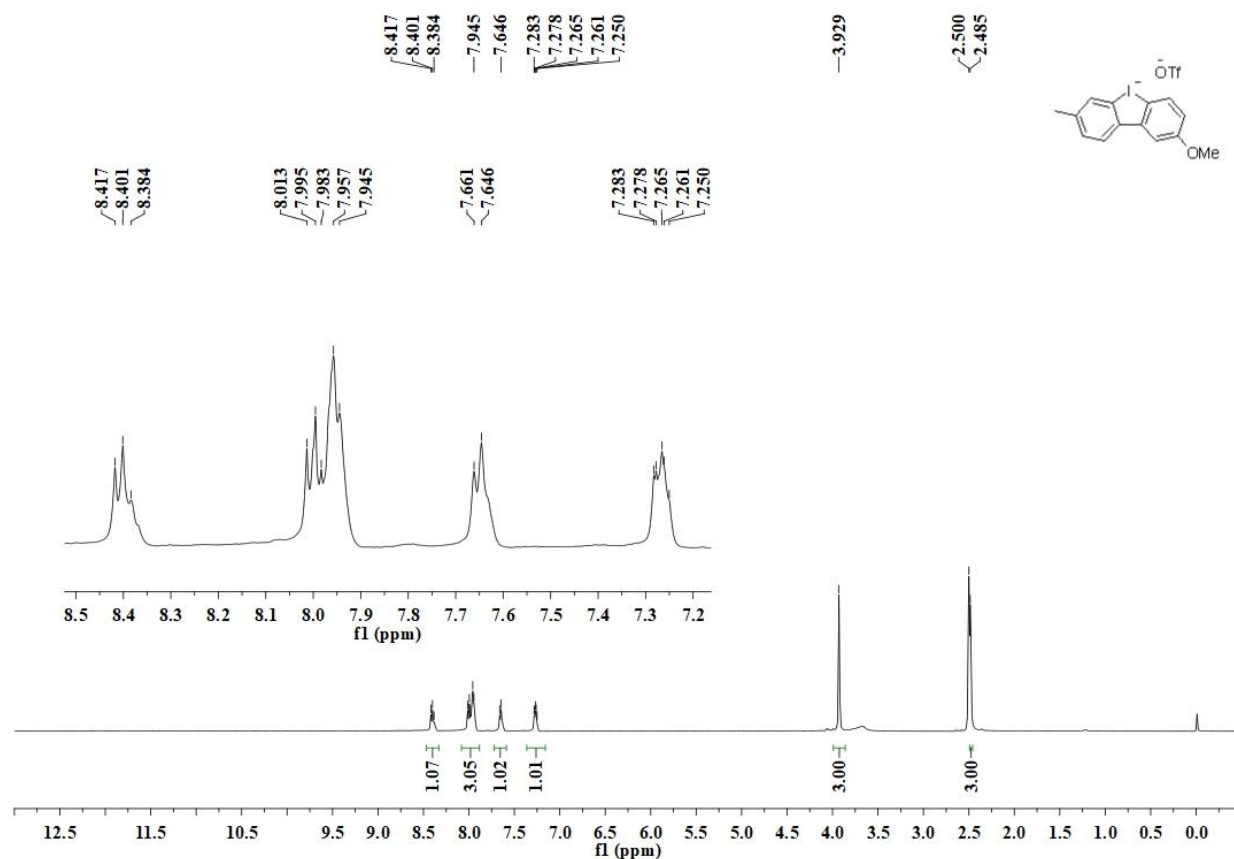

$^{13}\text{C}$  NMR (125 MHz,  $\text{DMSO-}d_6$ ) of **2I**

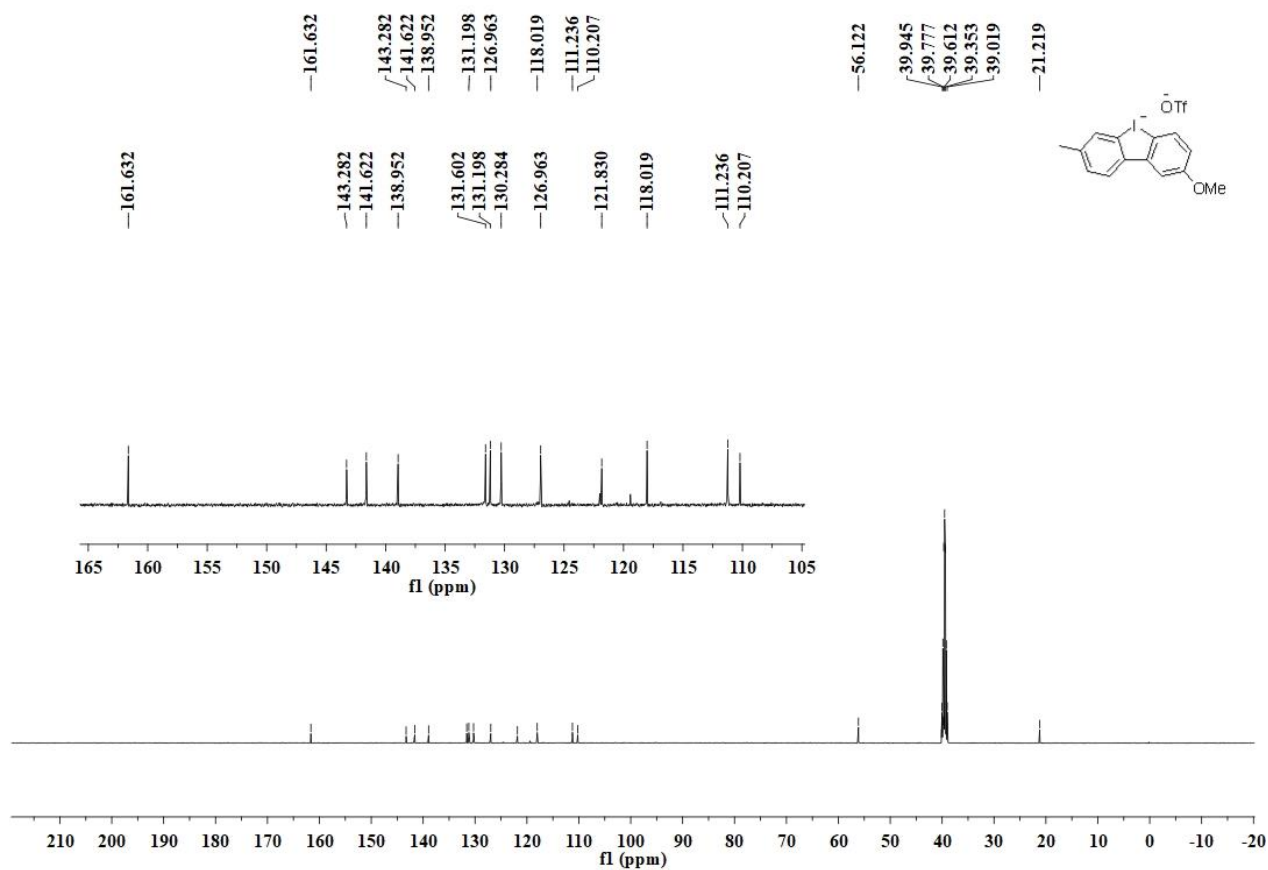



$^1\text{H}$  NMR (500 MHz,  $\text{DMSO-}d_6$ ) of **2n**

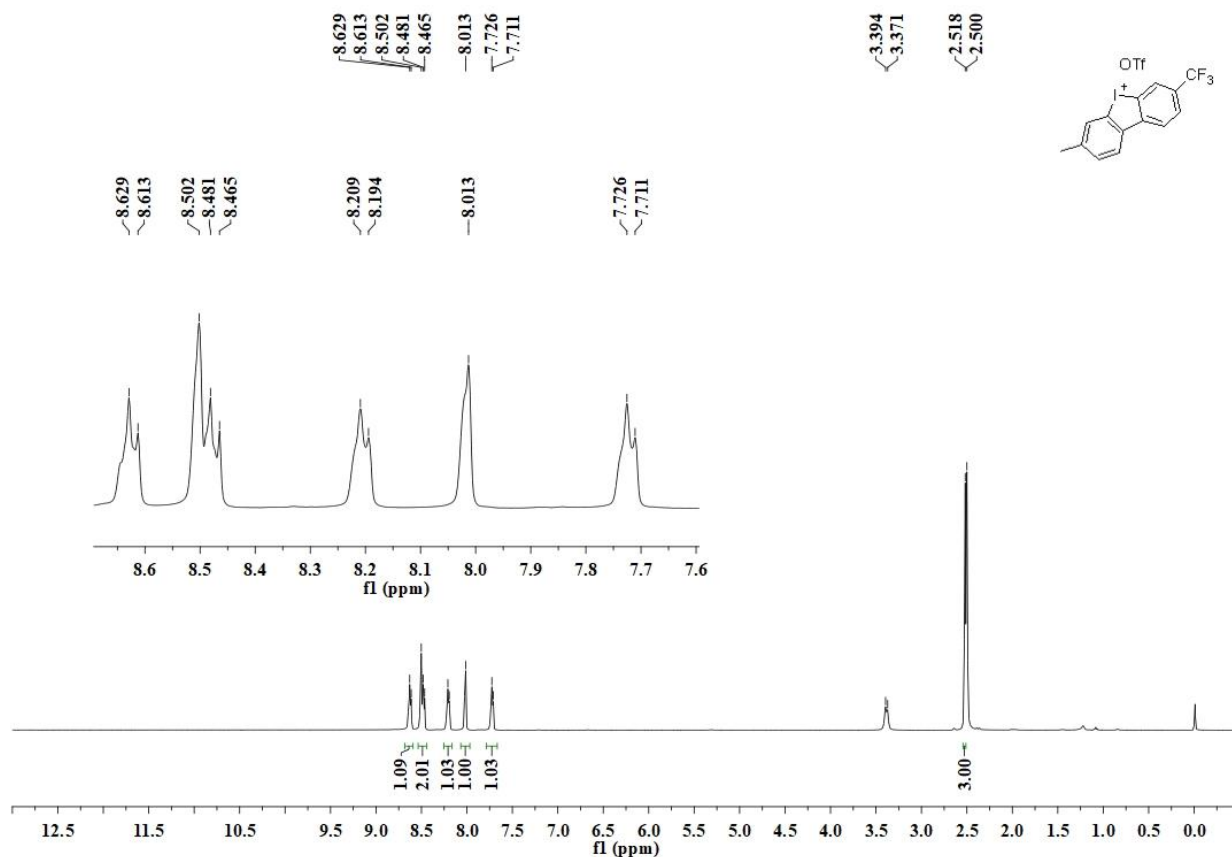

$^{13}\text{C}$  NMR (125 MHz,  $\text{DMSO-}d_6$ ) of **2n**

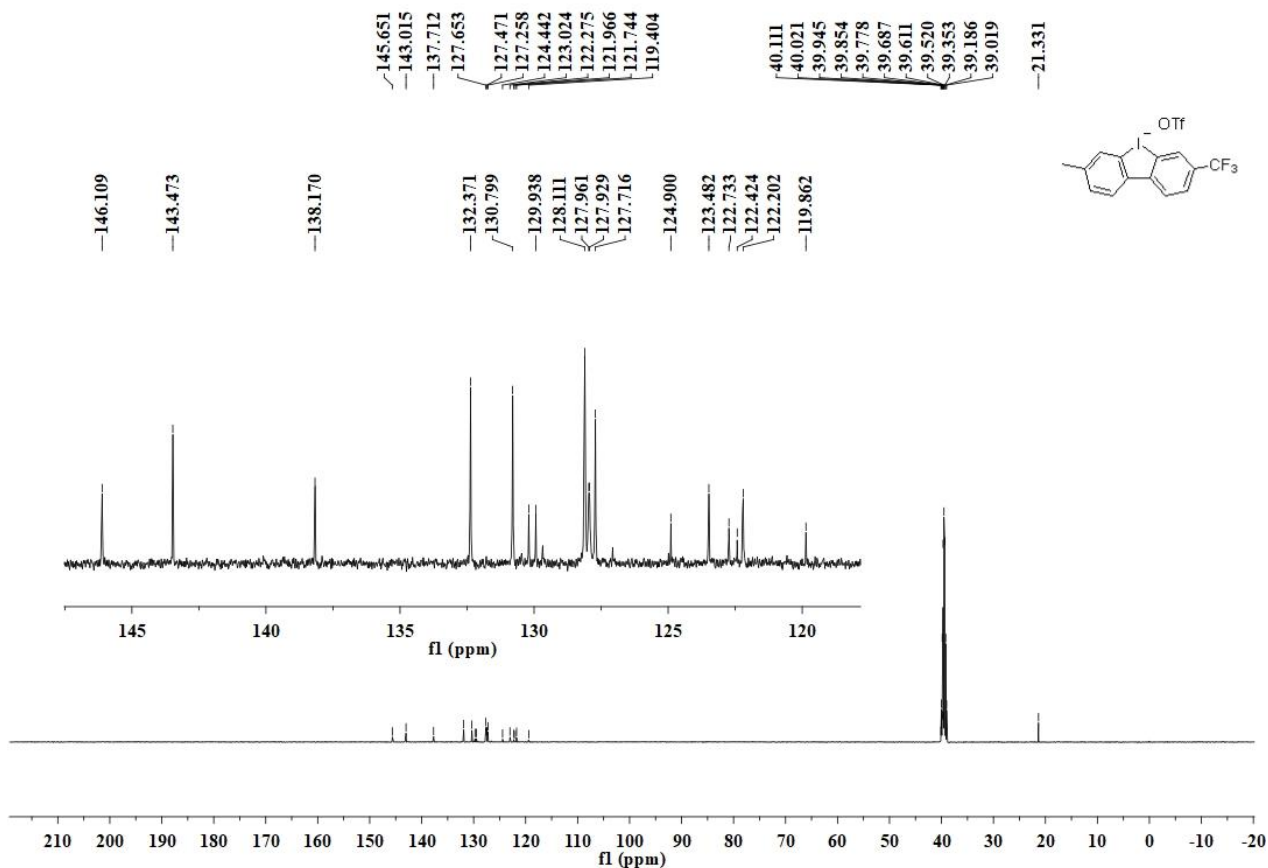

$^1\text{H}$  NMR (500 MHz,  $\text{CDCl}_3$ ) of **3a**

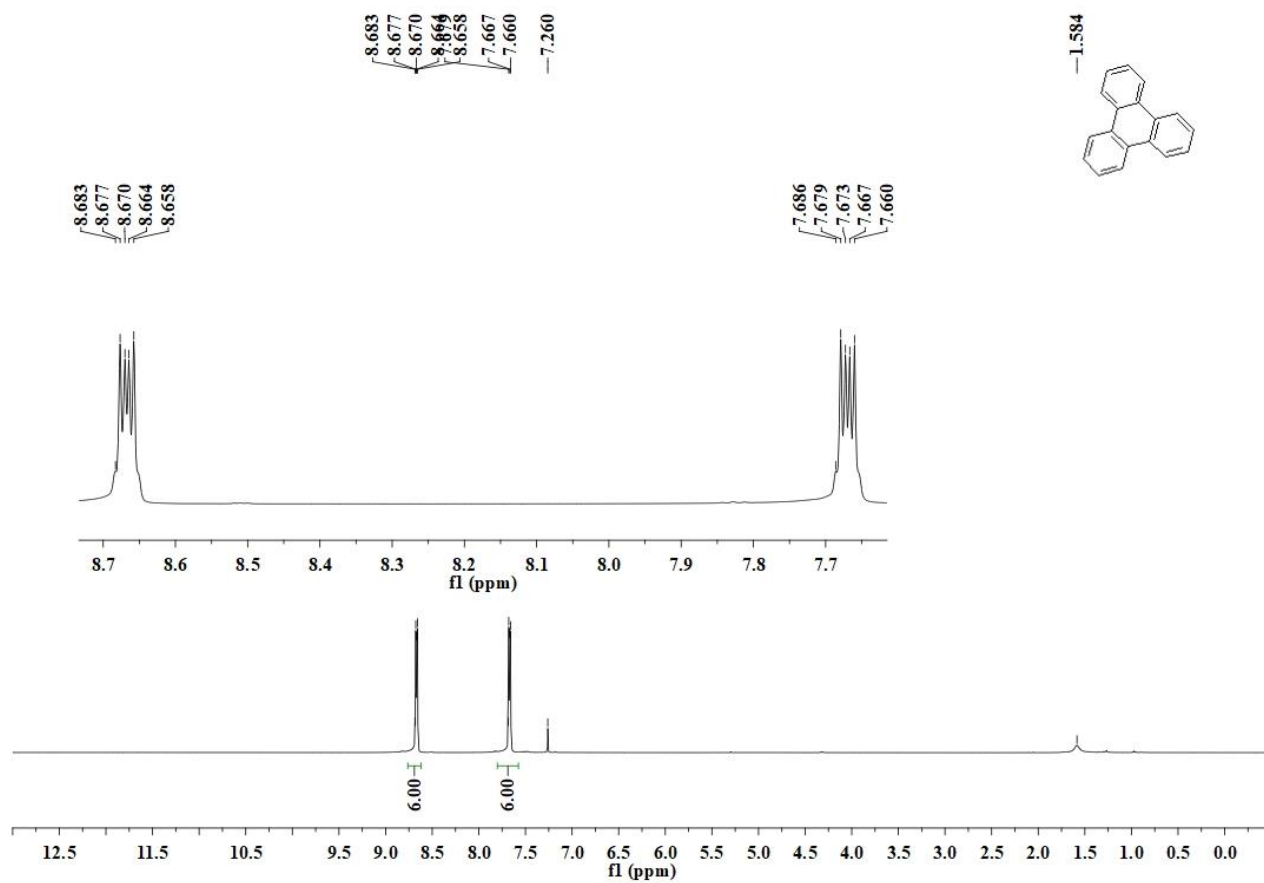

$^{13}\text{C}$  NMR (125 MHz,  $\text{CDCl}_3$ ) of **3a**

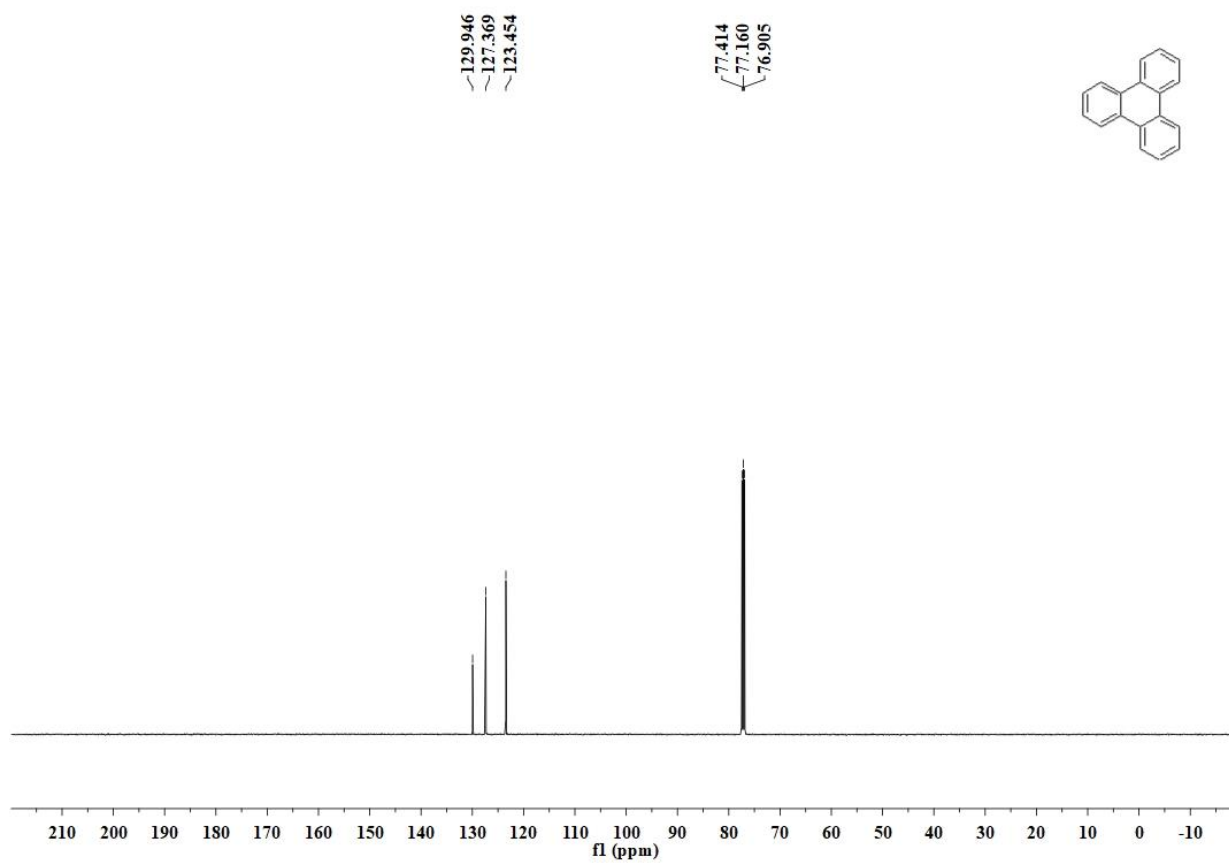

$^1\text{H}$  NMR (500 MHz,  $\text{CDCl}_3$ ) of **3b** and **4e**

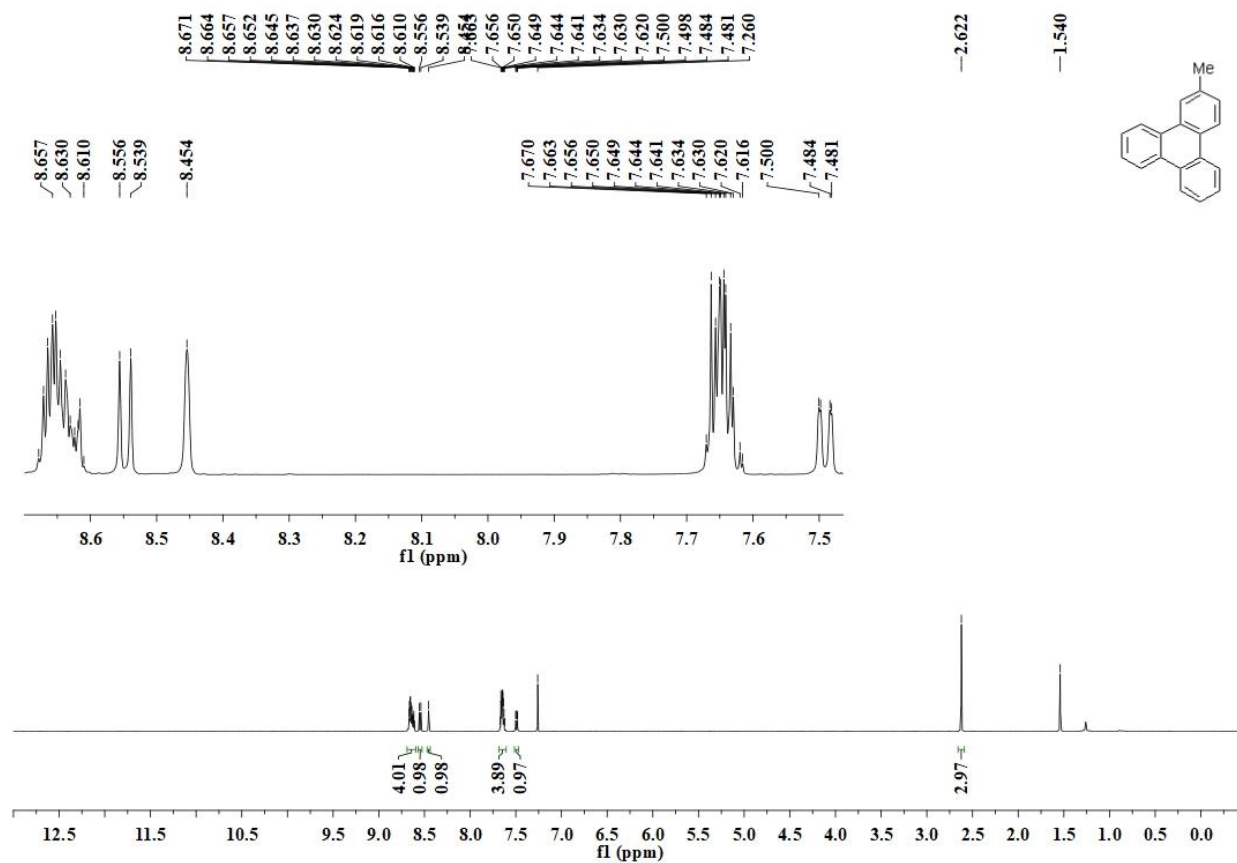

$^{13}\text{C}$  NMR (125 MHz,  $\text{CDCl}_3$ ) of **3b** and **4e**

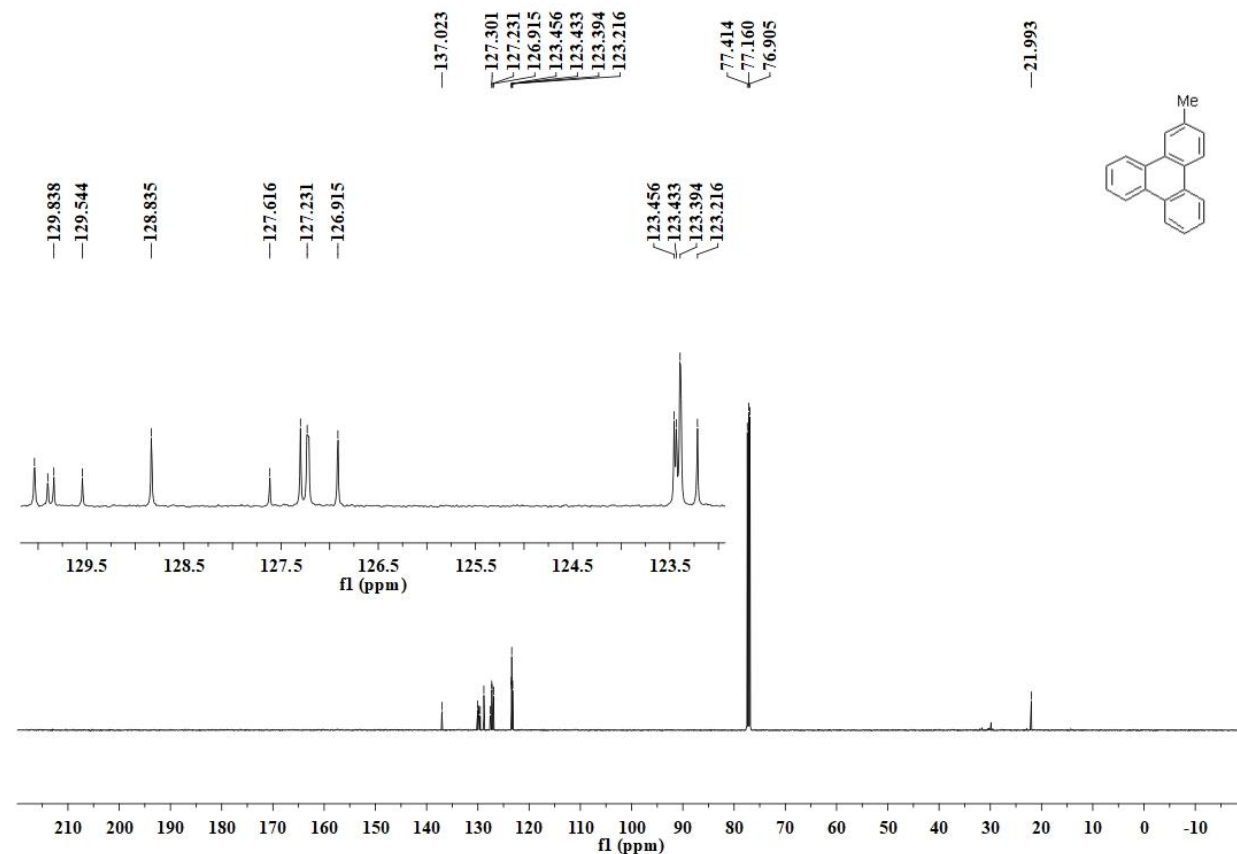

$^1\text{H}$  NMR (500 MHz,  $\text{CDCl}_3$ ) of **3c**

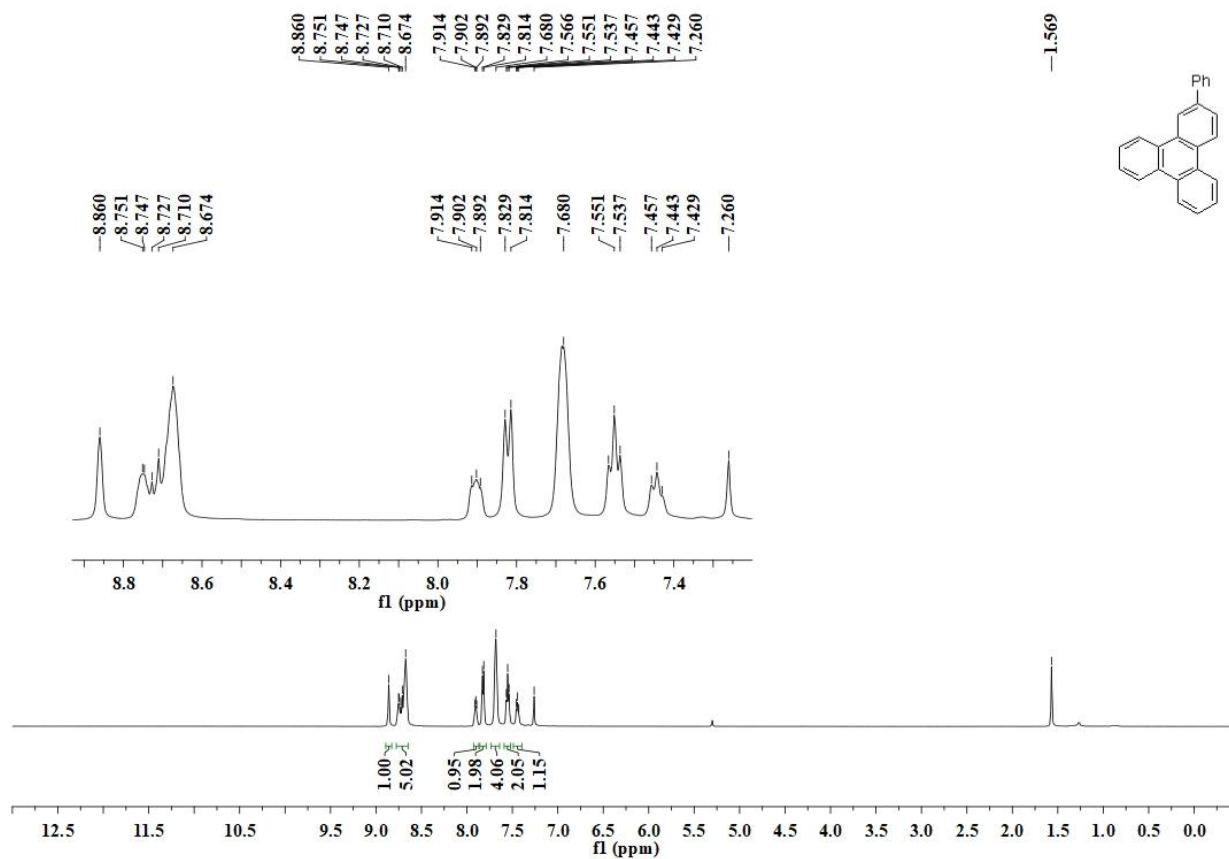

$^{13}\text{C}$  NMR (125 MHz,  $\text{CDCl}_3$ ) of **3c**

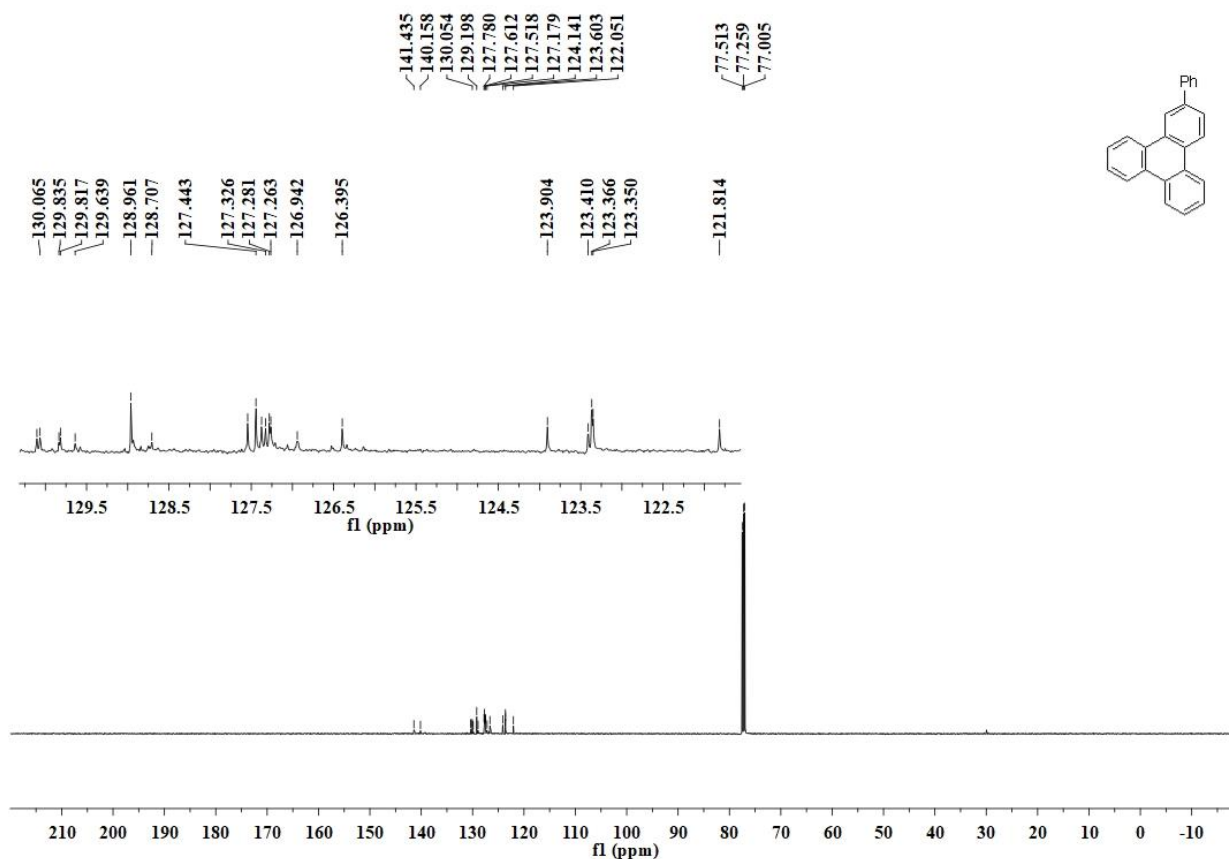

$^1\text{H}$  NMR (500 MHz,  $\text{CDCl}_3$ ) of **3d** and **4f**

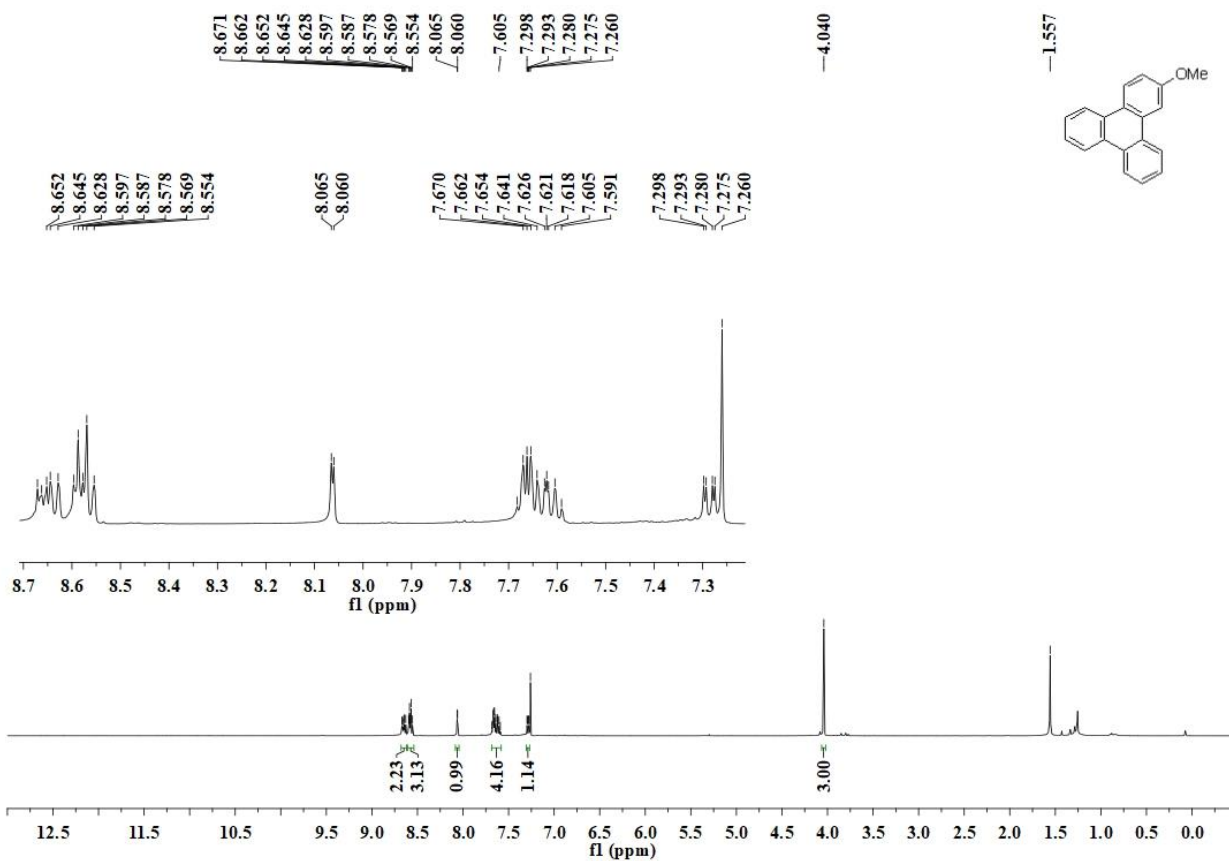

$^{13}\text{C}$  NMR (125 MHz,  $\text{CDCl}_3$ ) of **3d** and **4f**

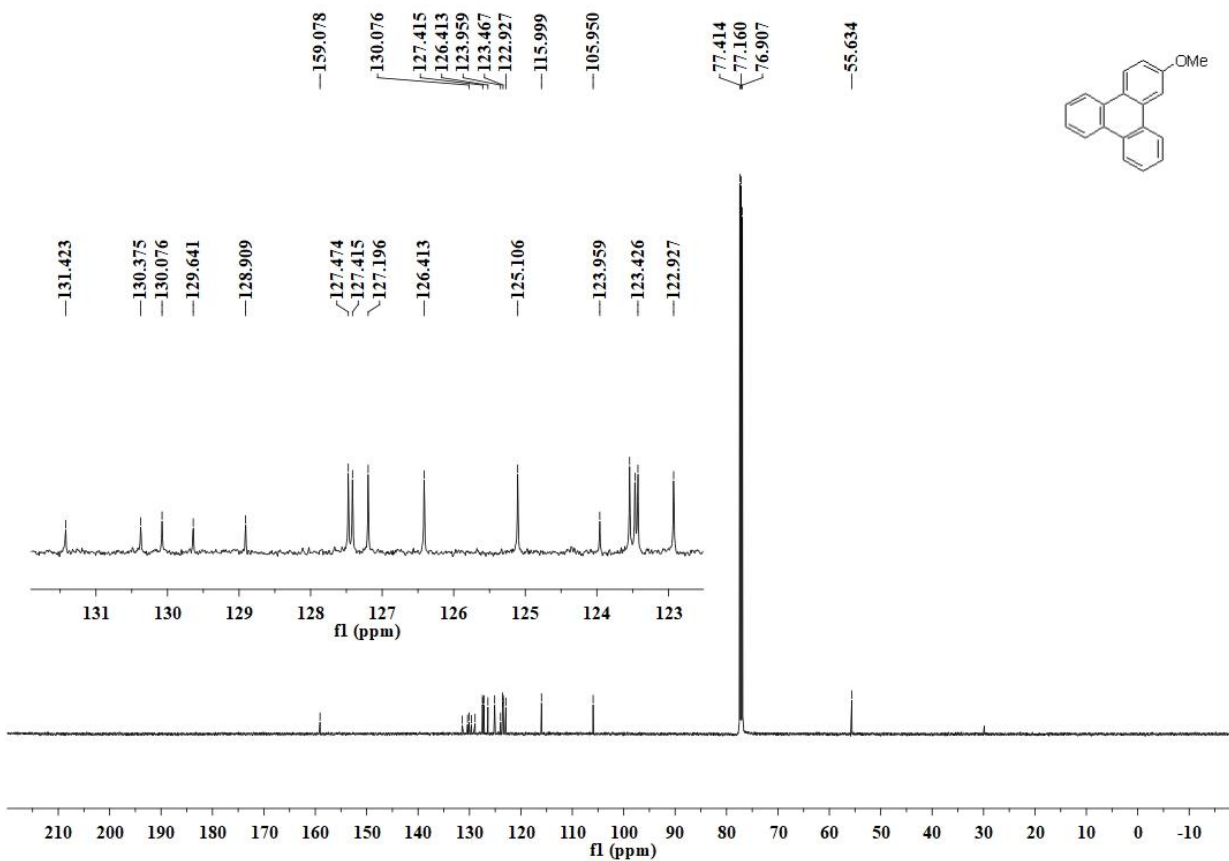

$^1\text{H}$  NMR (500 MHz,  $\text{CDCl}_3$ ) of **3e**

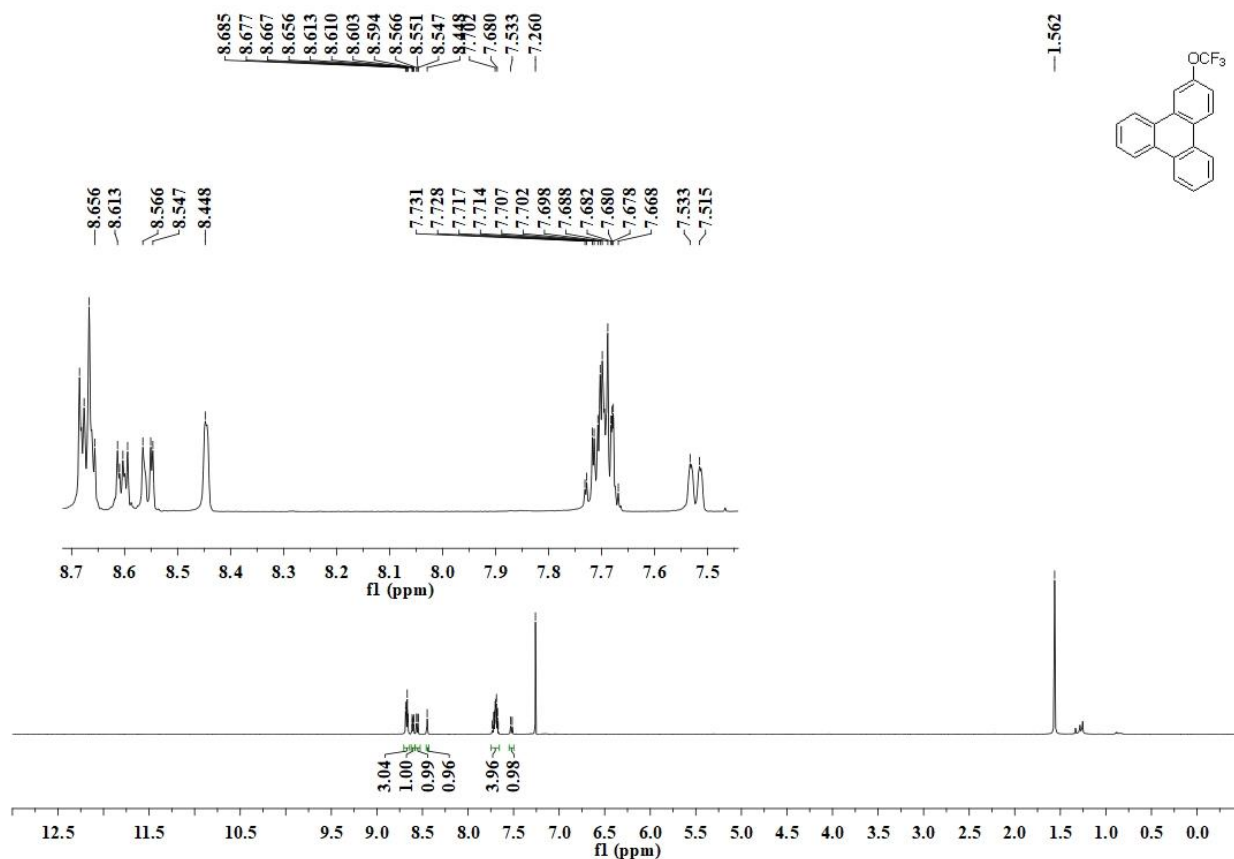

$^{13}\text{C}$  NMR (125 MHz,  $\text{CDCl}_3$ ) of **3e**

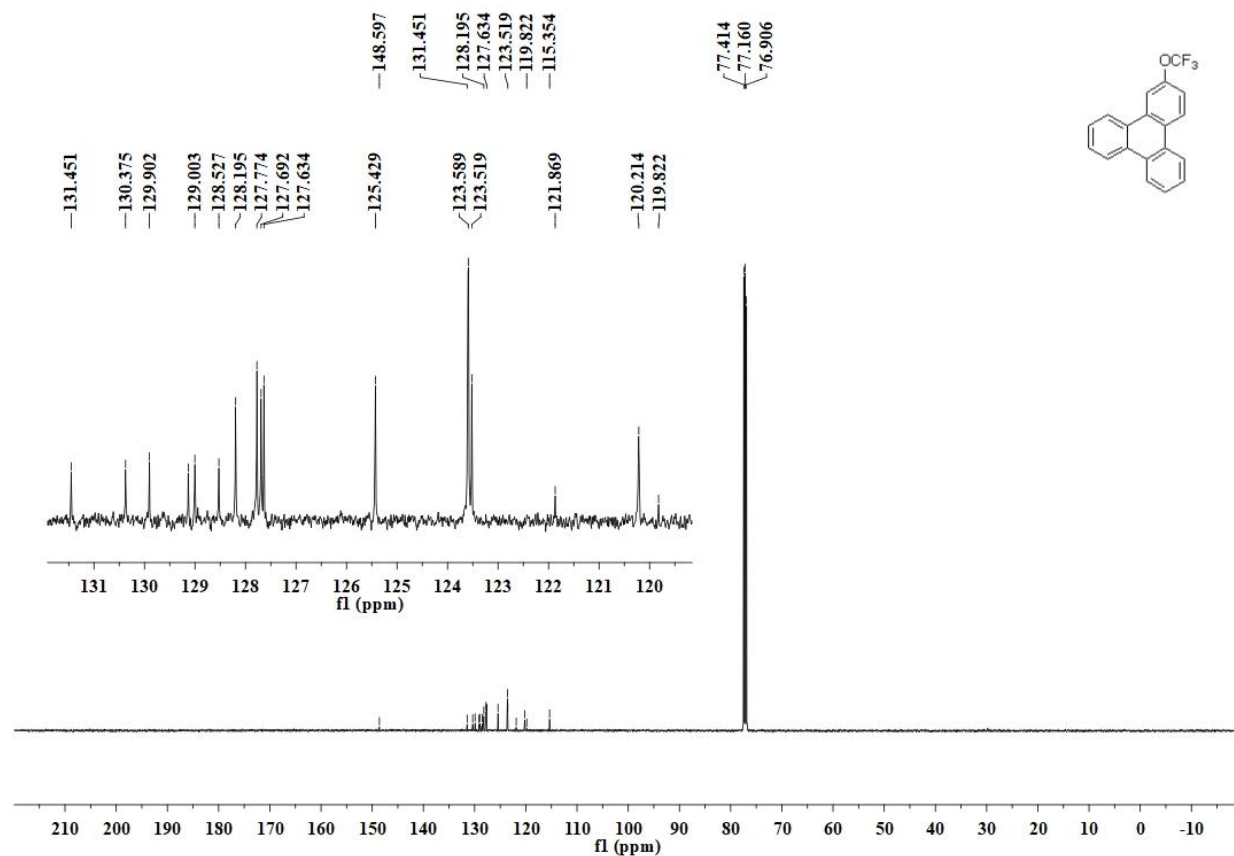

$^{19}\text{F}$  NMR (376 MHz,  $\text{CDCl}_3$ ) of **3e**

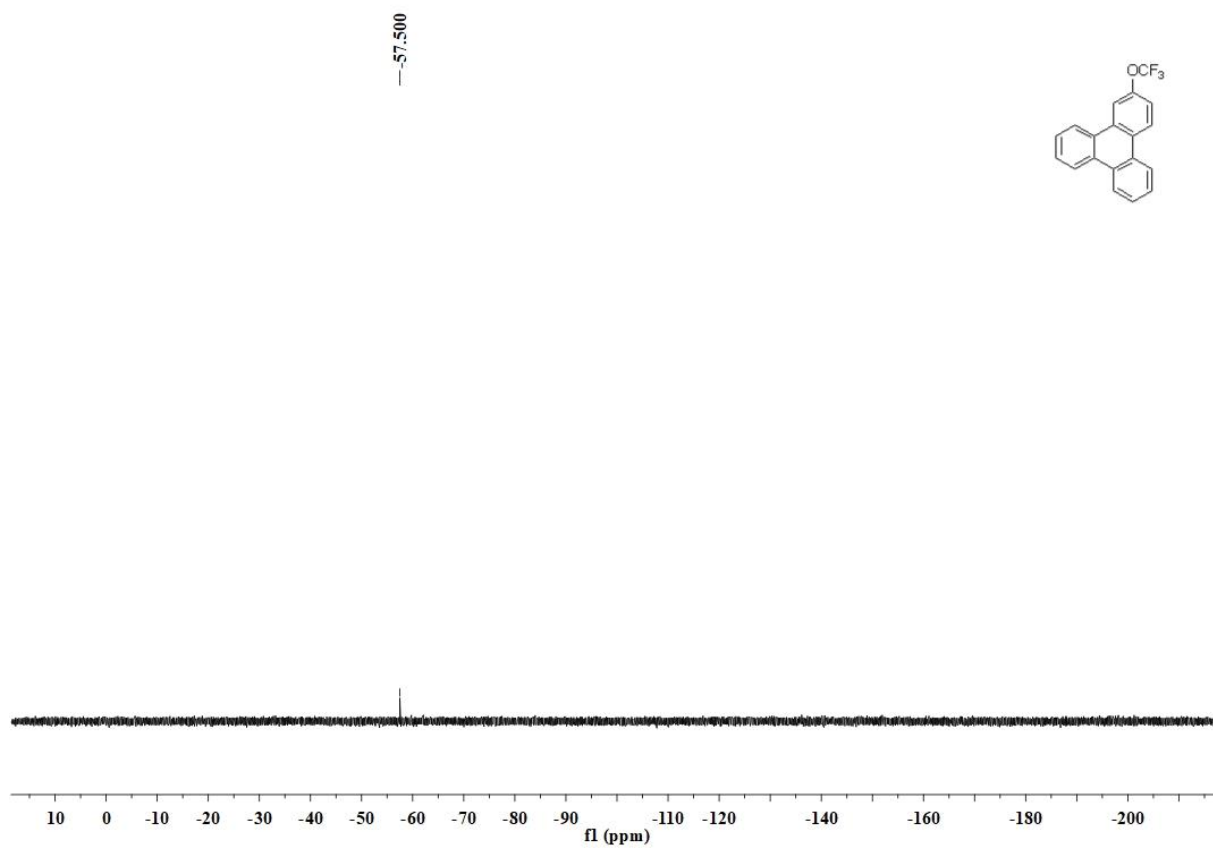

$^1\text{H}$  NMR (500 MHz,  $\text{CDCl}_3$ ) of **3f**

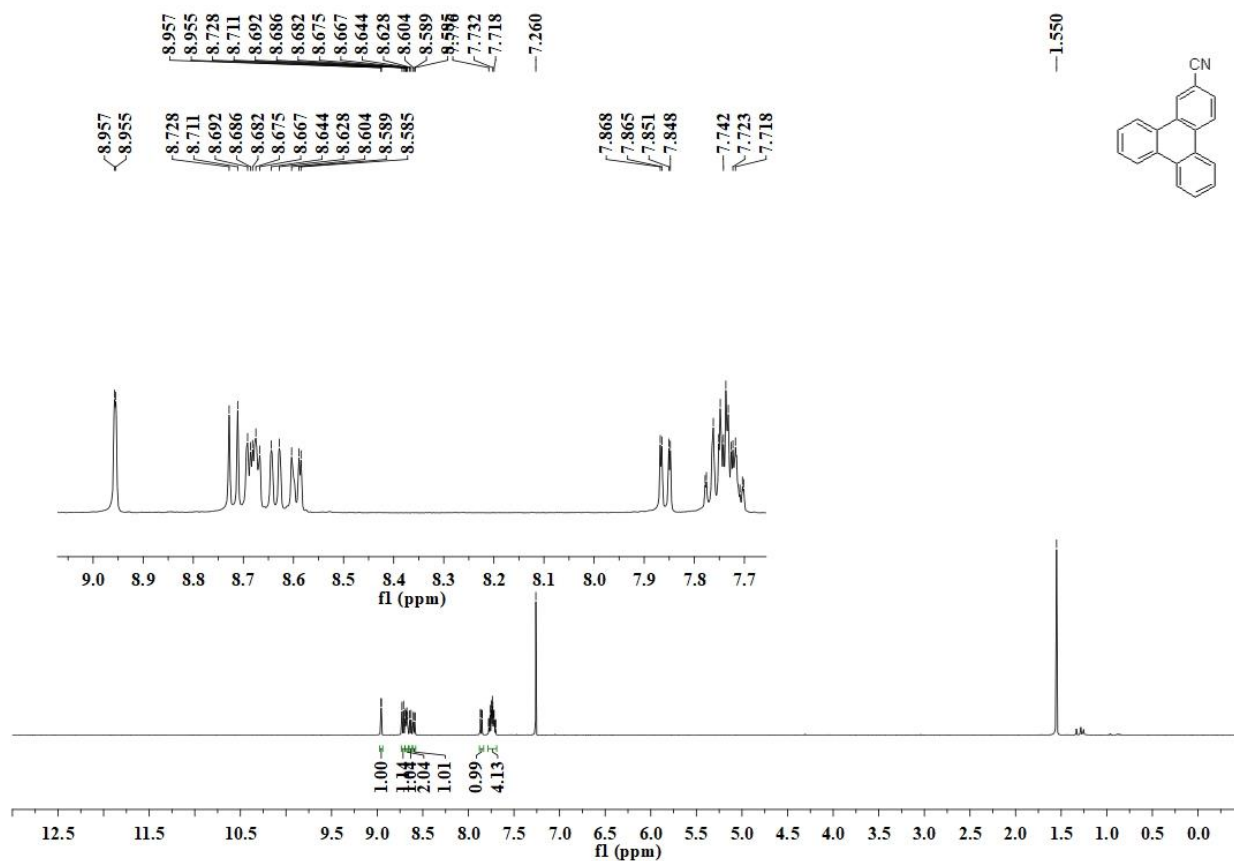

$^{13}\text{C}$  NMR (125 MHz,  $\text{CDCl}_3$ ) of **3f**

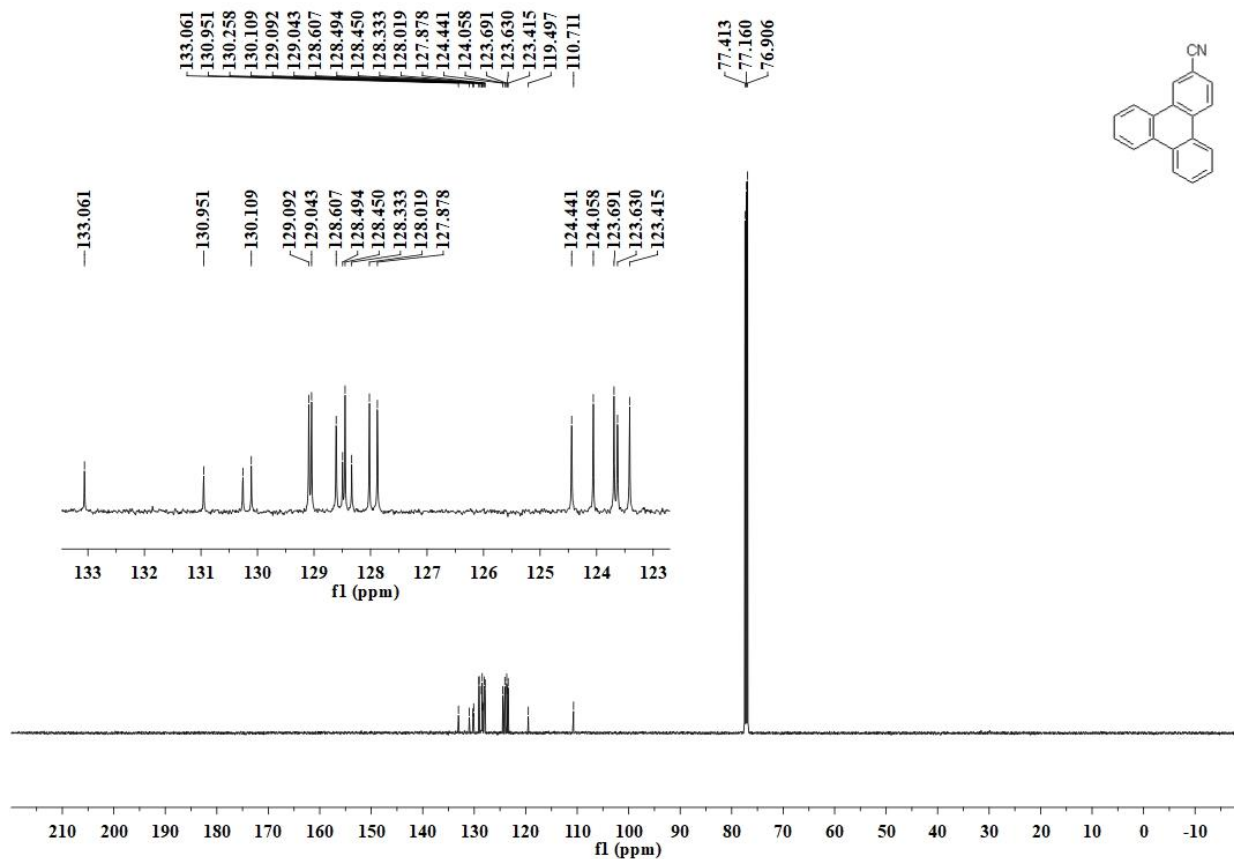



$^1\text{H}$  NMR (500 MHz,  $\text{CDCl}_3$ ) of **3g** and **4g**

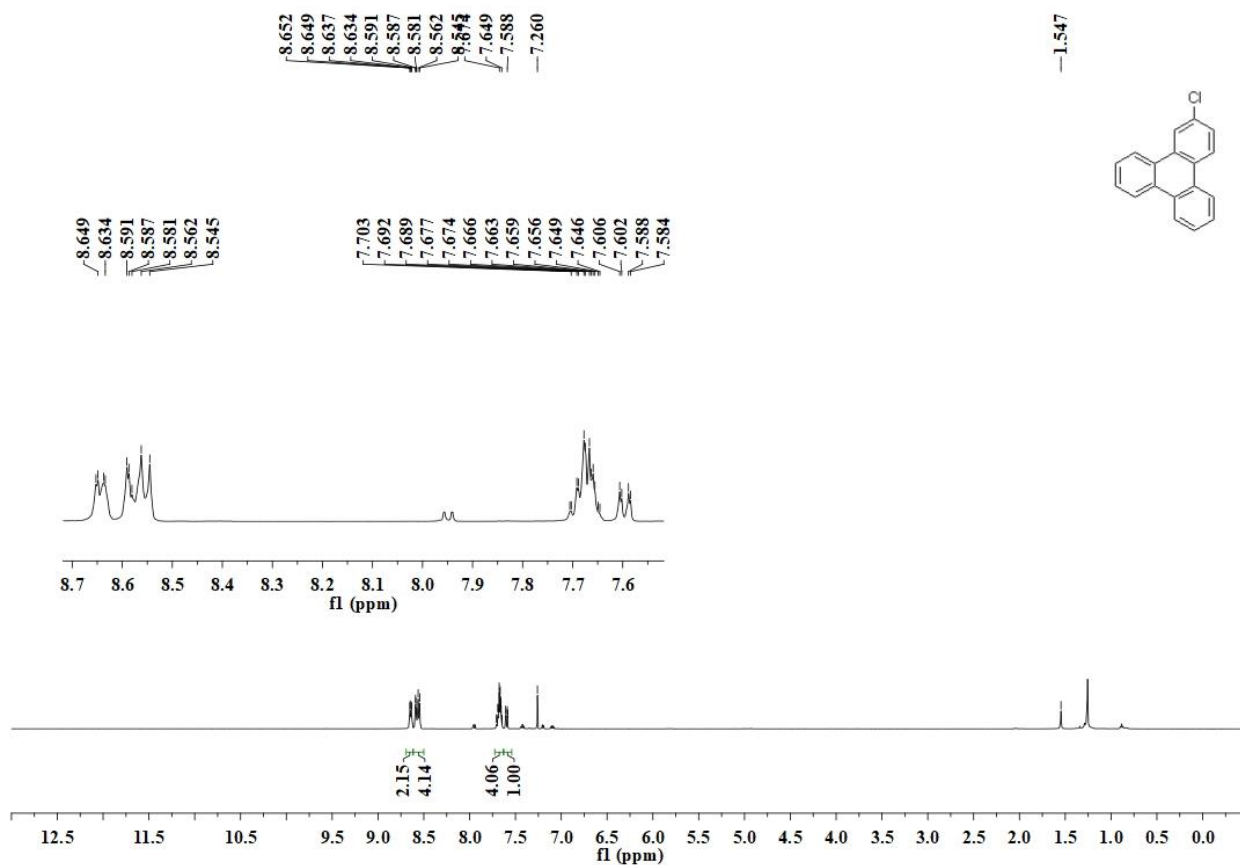

$^{13}\text{C}$  NMR (125 MHz,  $\text{CDCl}_3$ ) of **3g** and **4g**

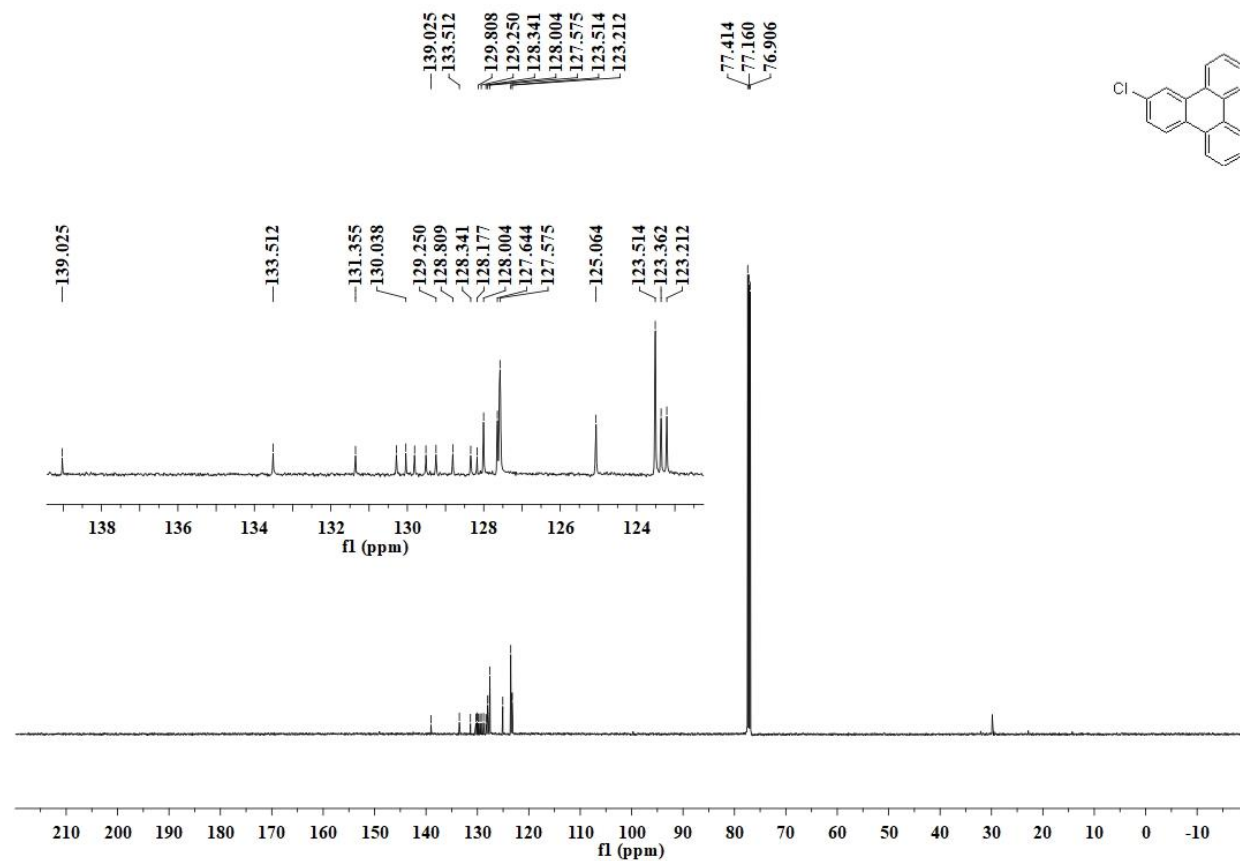

$^1\text{H}$  NMR (500 MHz,  $\text{CDCl}_3$ ) of **3h**

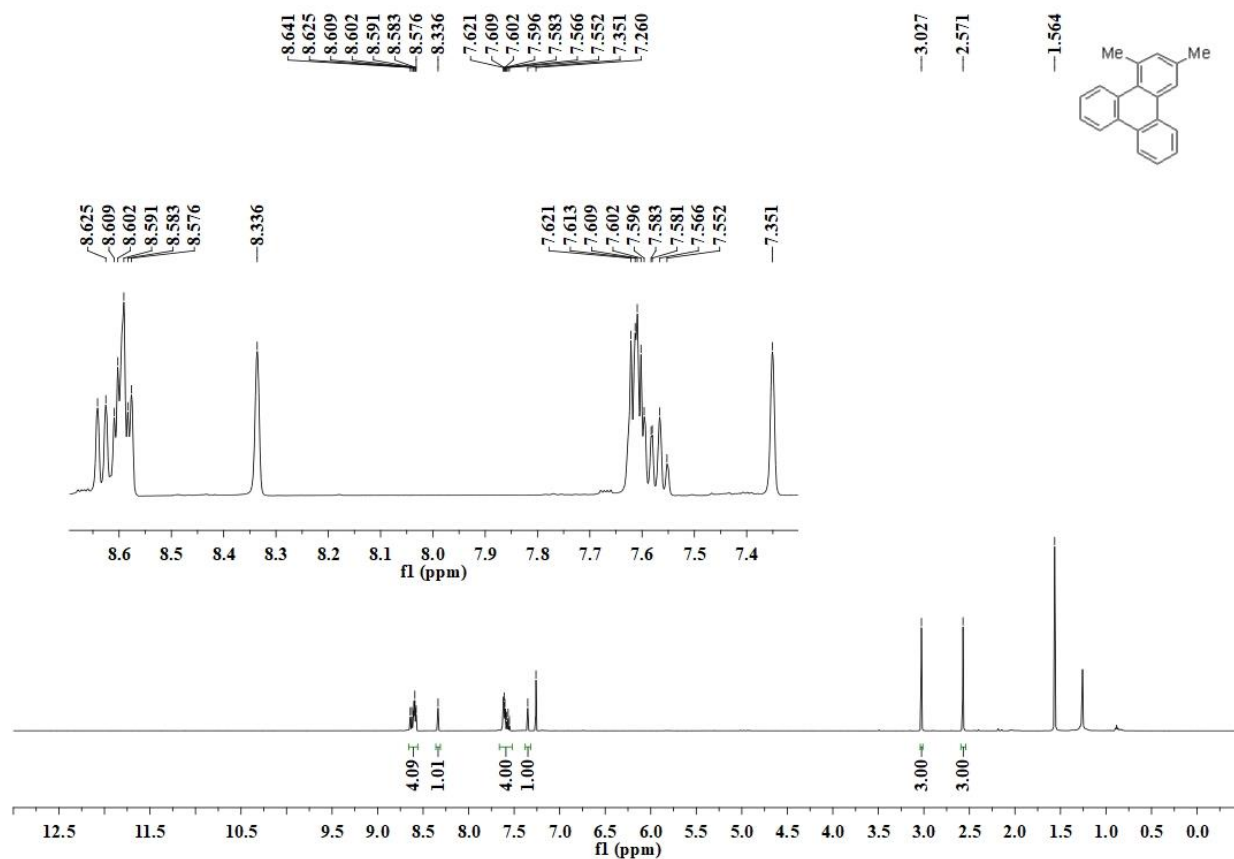

$^{13}\text{C}$  NMR (125 MHz,  $\text{CDCl}_3$ ) of **3h**

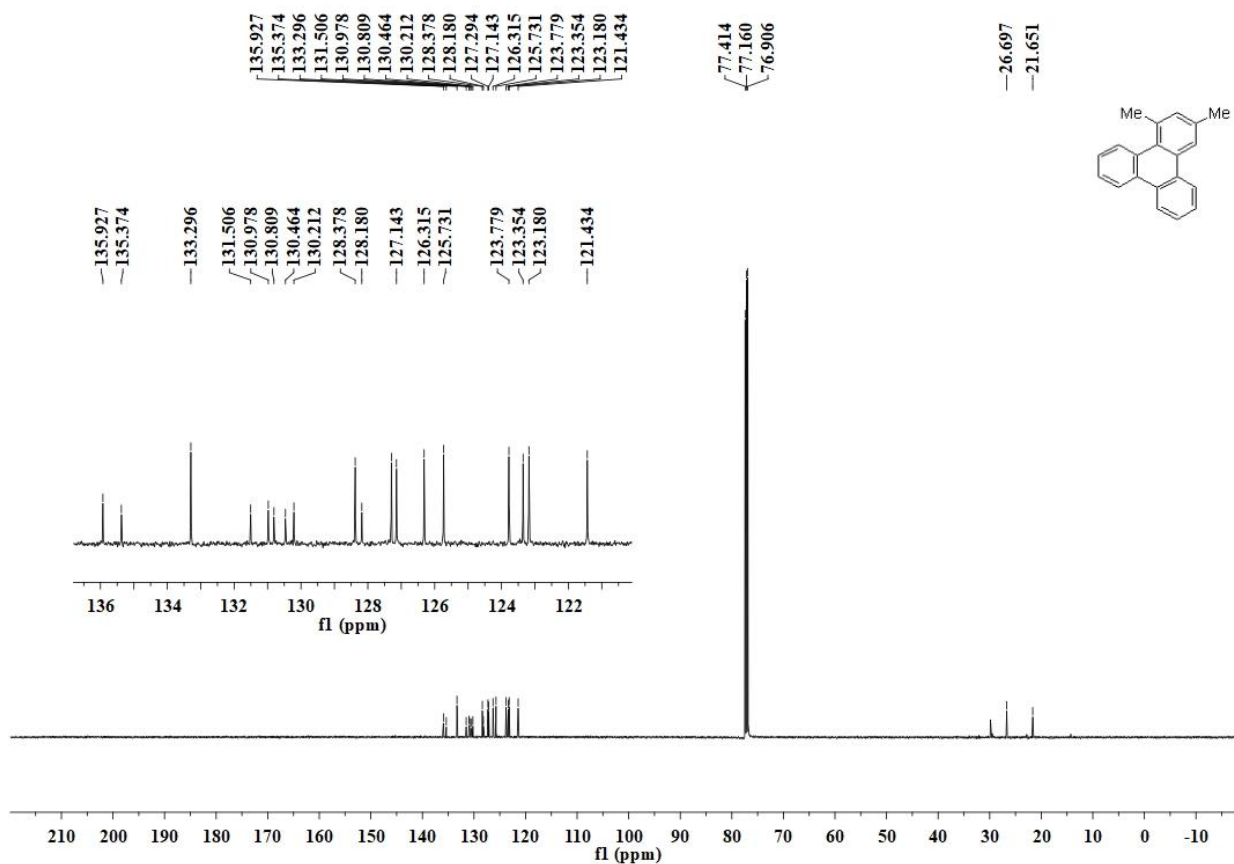

$^1\text{H}$  NMR (500 MHz,  $\text{CDCl}_3$ ) of **3i**

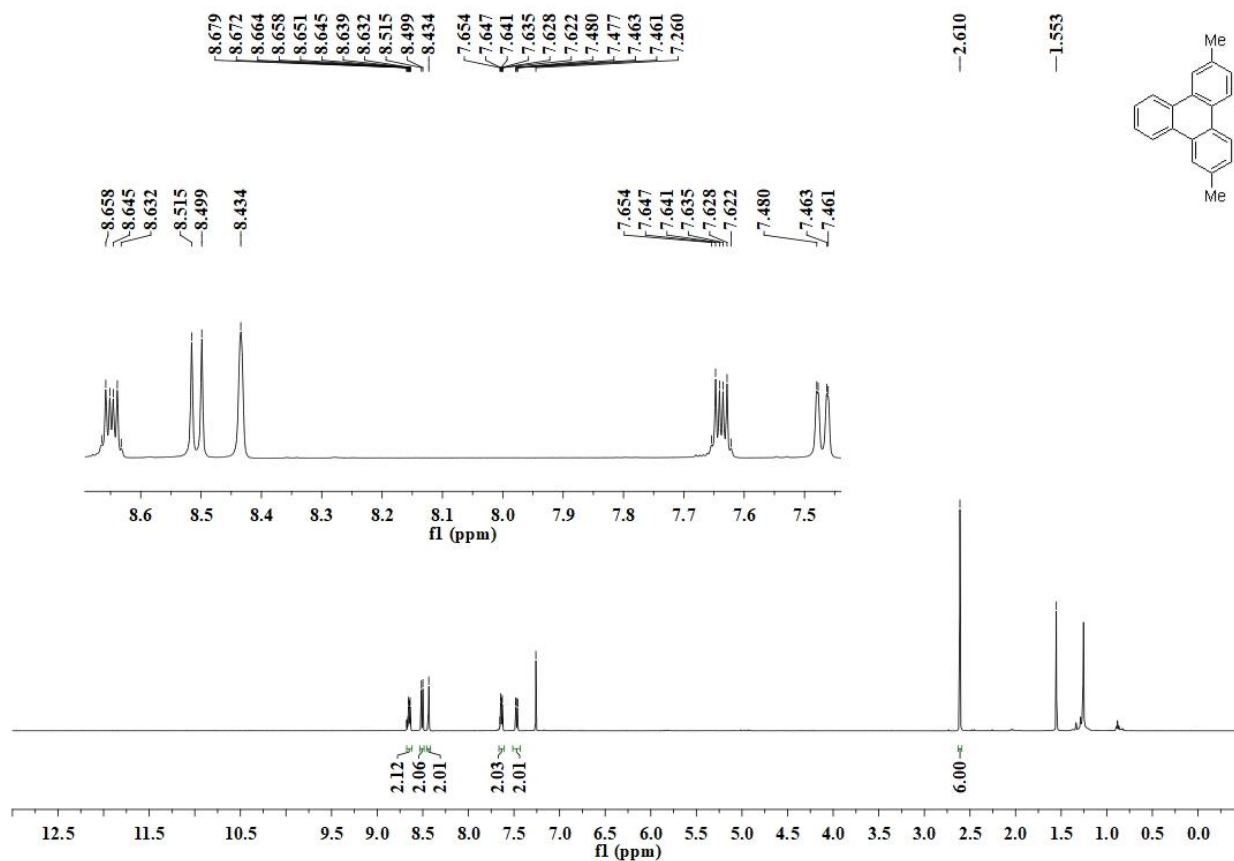

$^{13}\text{C}$  NMR (125 MHz,  $\text{CDCl}_3$ ) of **3i**

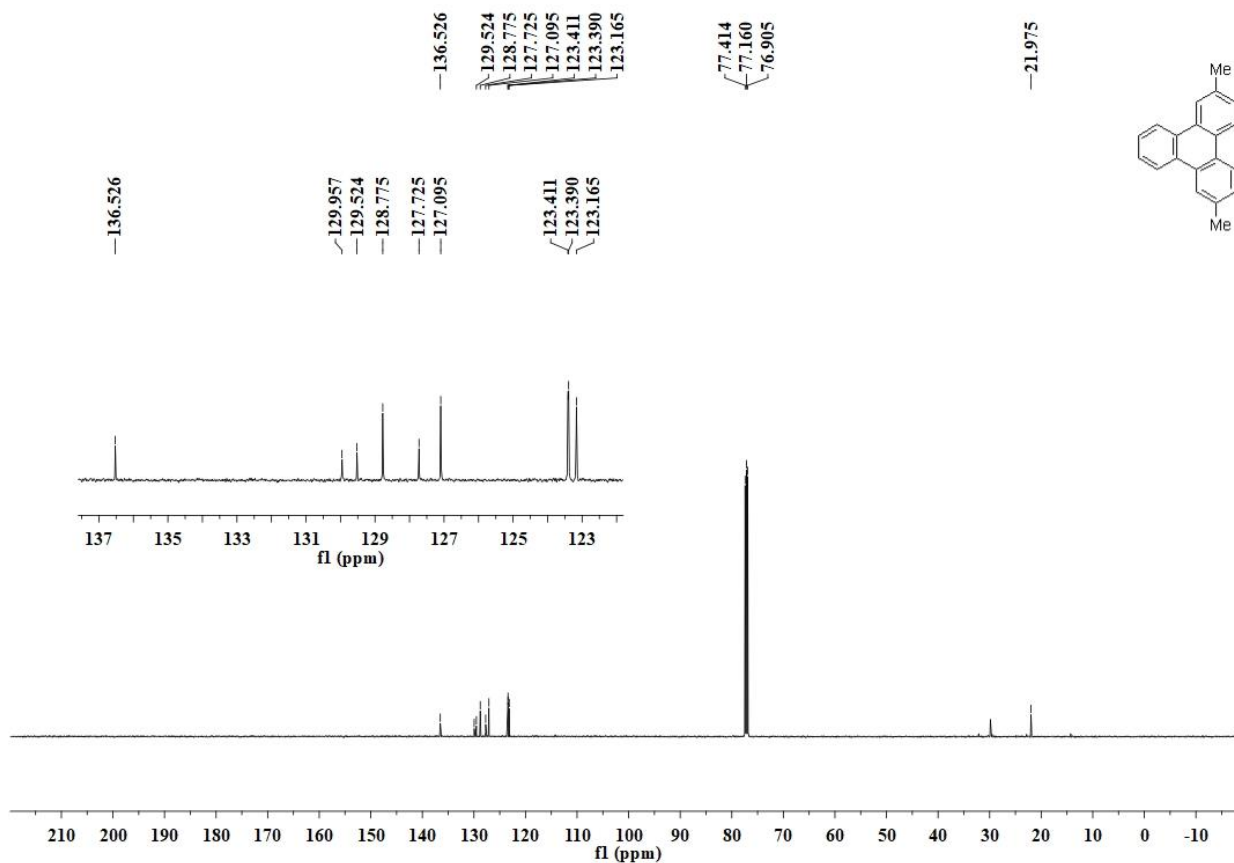

$^1\text{H}$  NMR (500 MHz,  $\text{CDCl}_3$ ) of **3j**

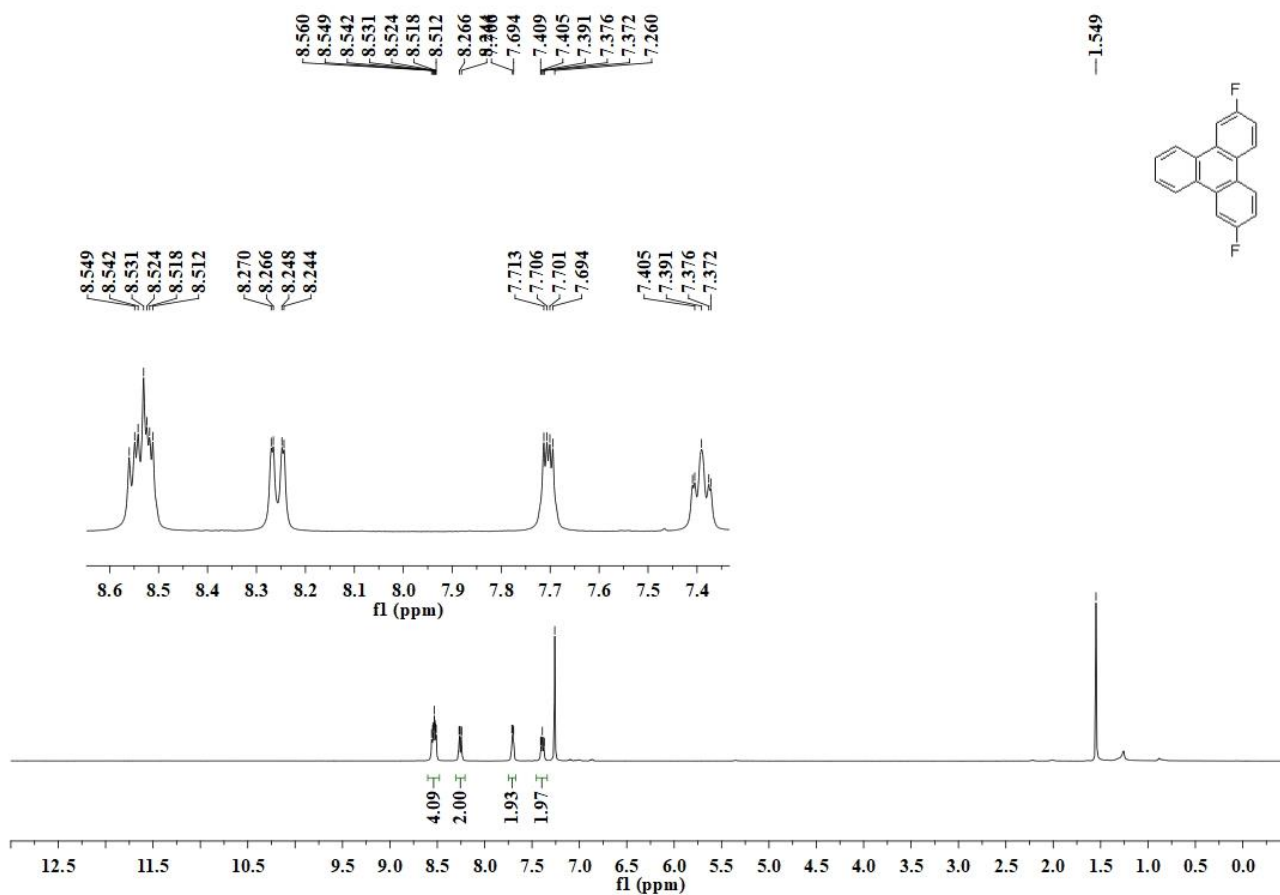

$^{13}\text{C}$  NMR (125 MHz,  $\text{CDCl}_3$ ) of **3j**

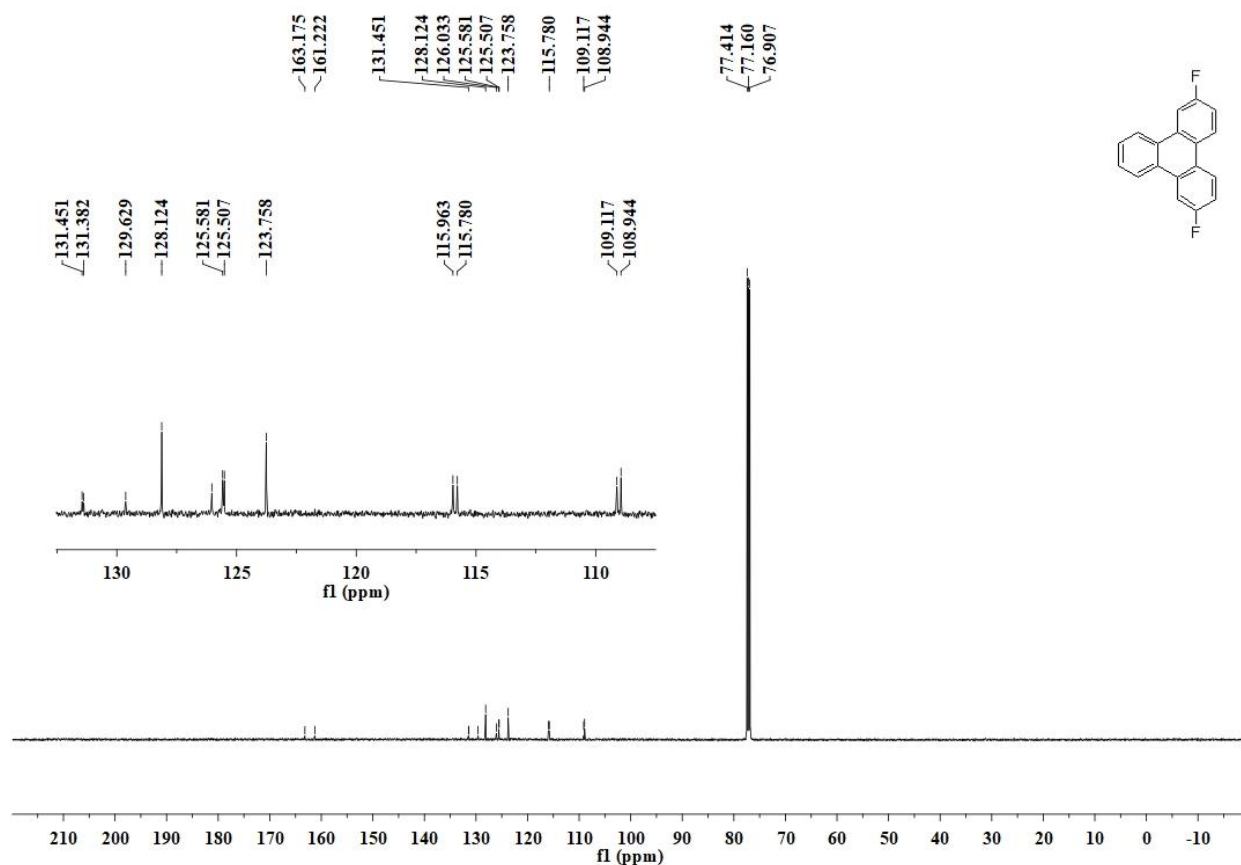

$^{19}\text{F}$  NMR (376 MHz,  $\text{CDCl}_3$ ) of **3j**

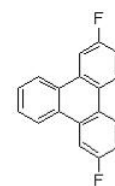

-114.265

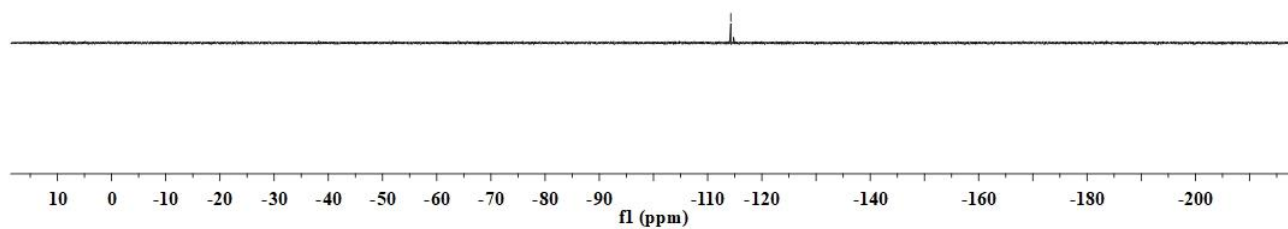

$^1\text{H}$  NMR (500 MHz,  $\text{CDCl}_3$ ) of **3k**

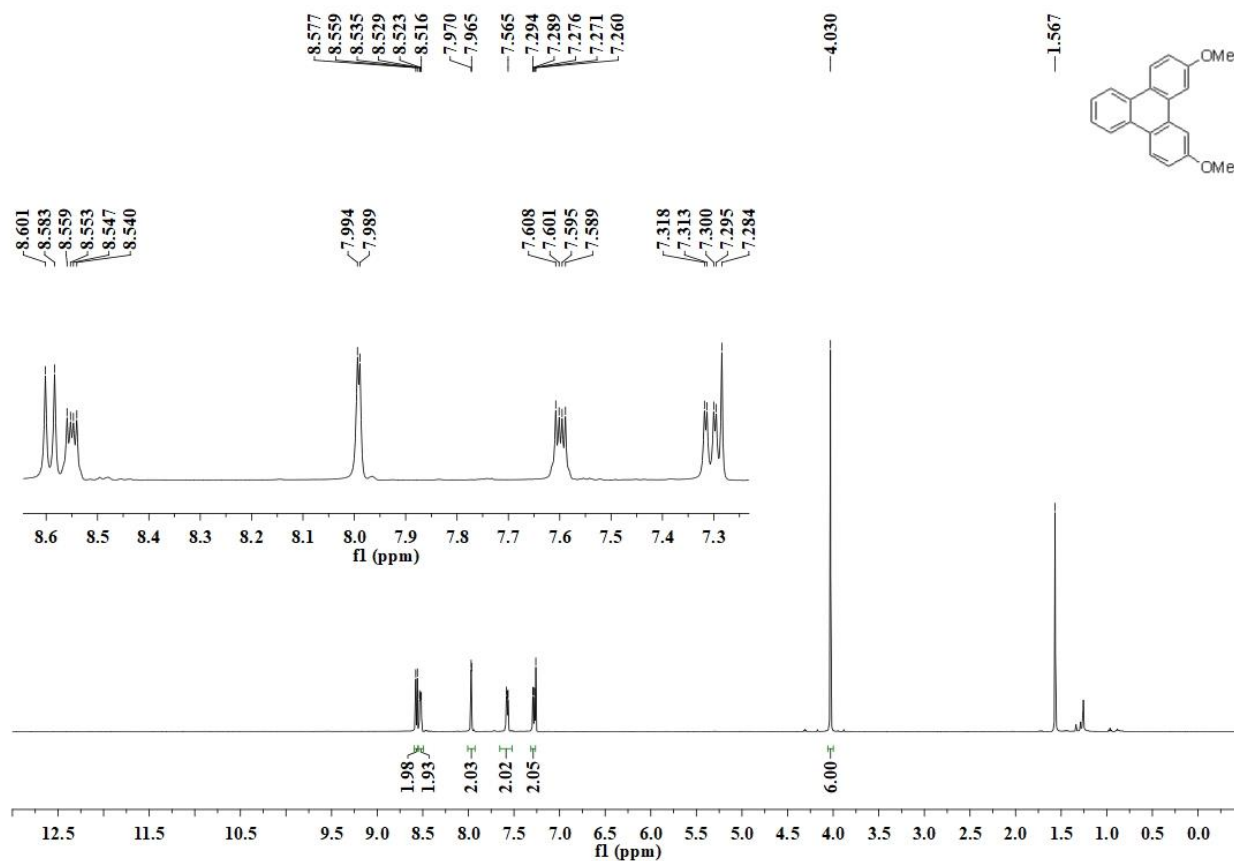

$^{13}\text{C}$  NMR (125 MHz,  $\text{CDCl}_3$ ) of **3k**

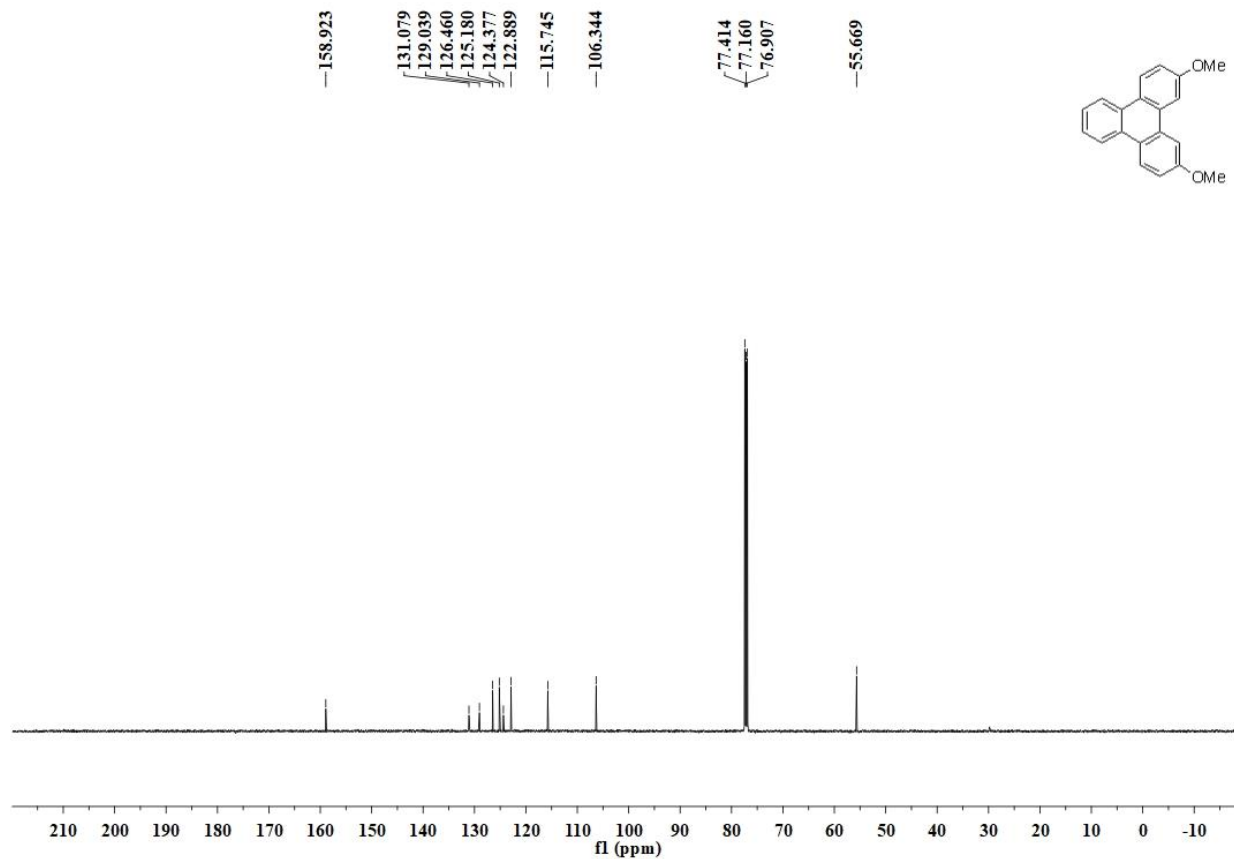

$^1\text{H}$  NMR (500 MHz,  $\text{CDCl}_3$ ) of **31**

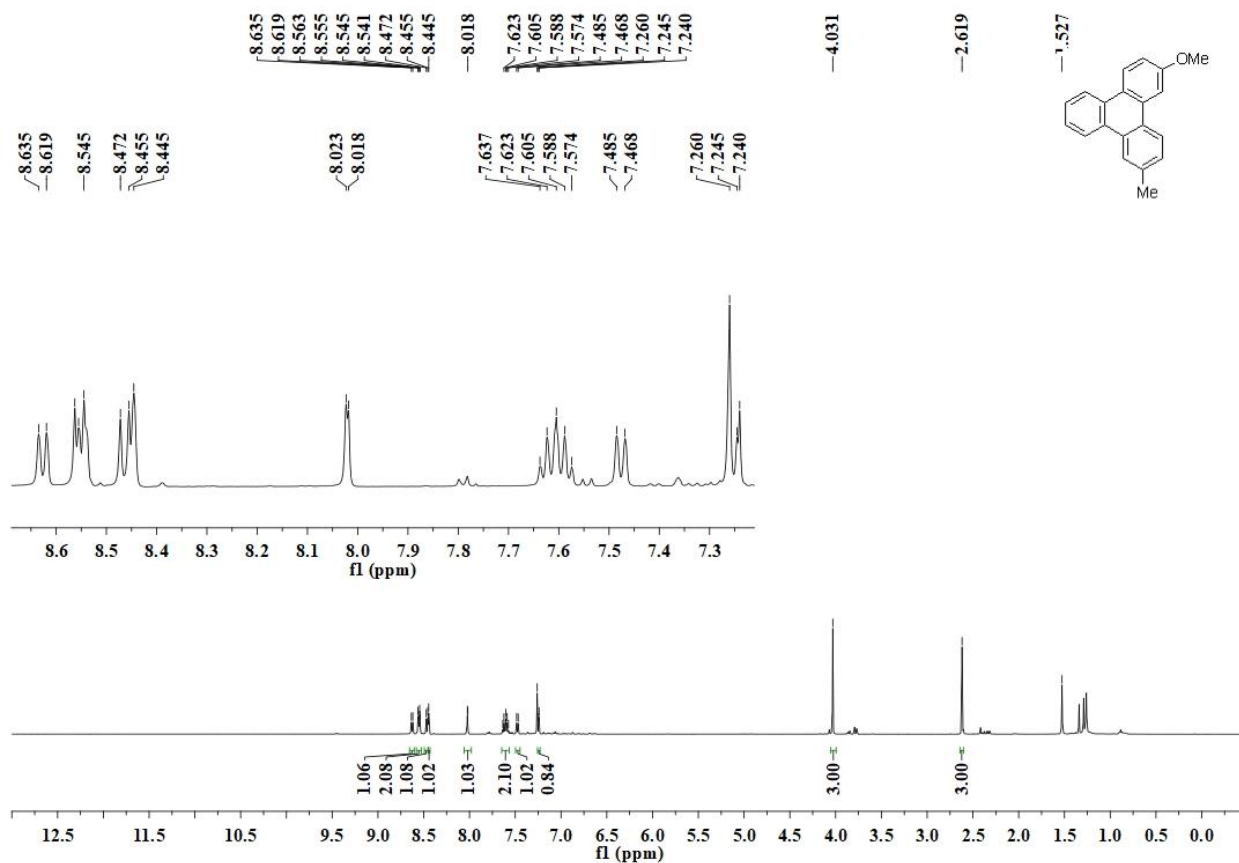

$^{13}\text{C}$  NMR (125 MHz,  $\text{CDCl}_3$ ) of **31**

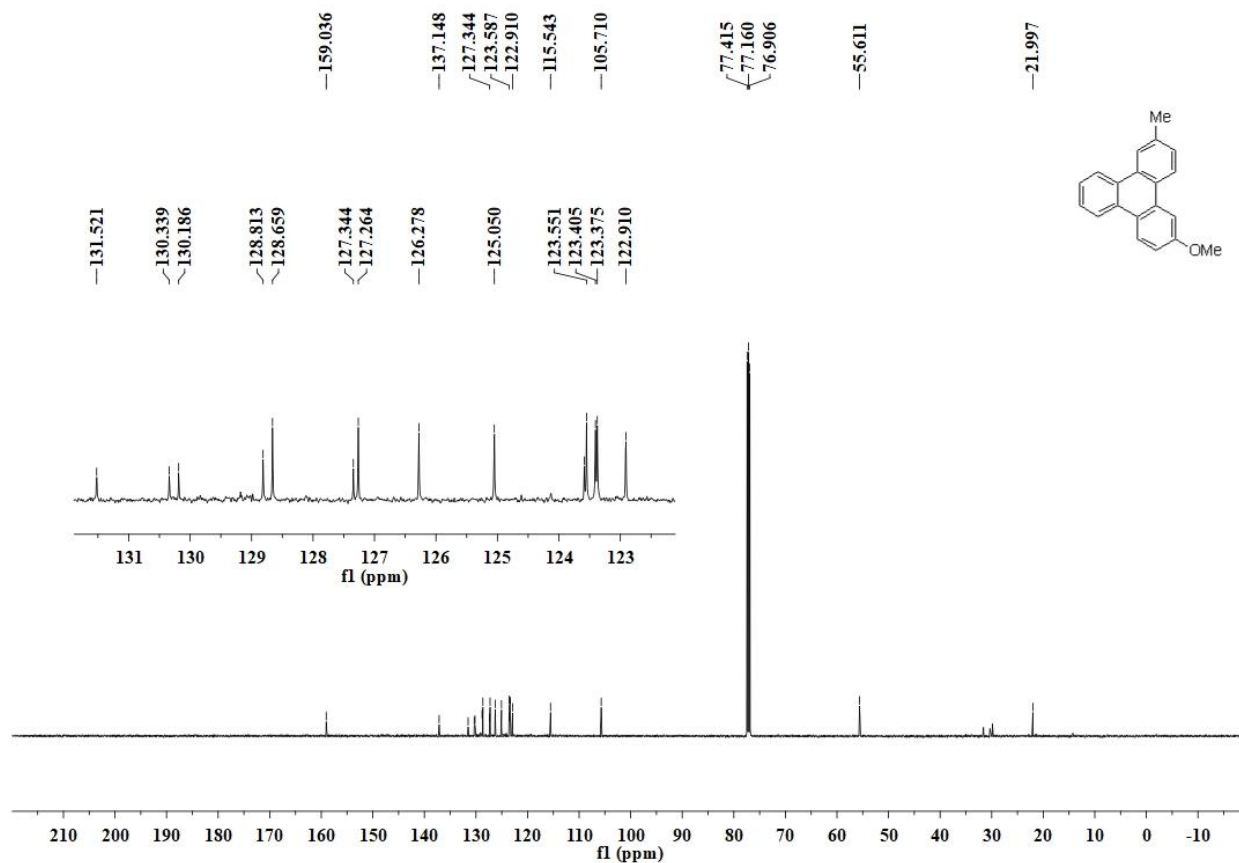

$^1\text{H}$  NMR (500 MHz,  $\text{CDCl}_3$ ) of **3m**

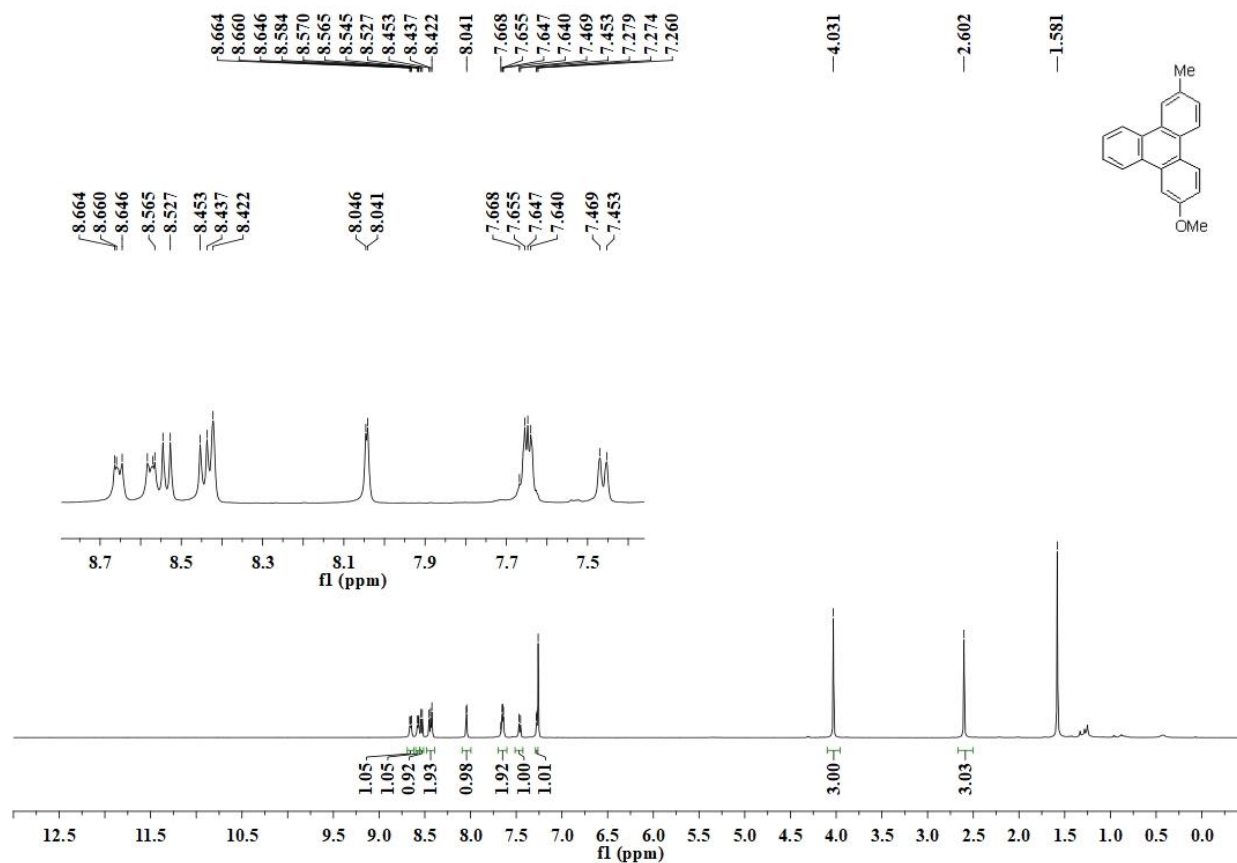

$^{13}\text{C}$  NMR (125 MHz,  $\text{CDCl}_3$ ) of **3m**

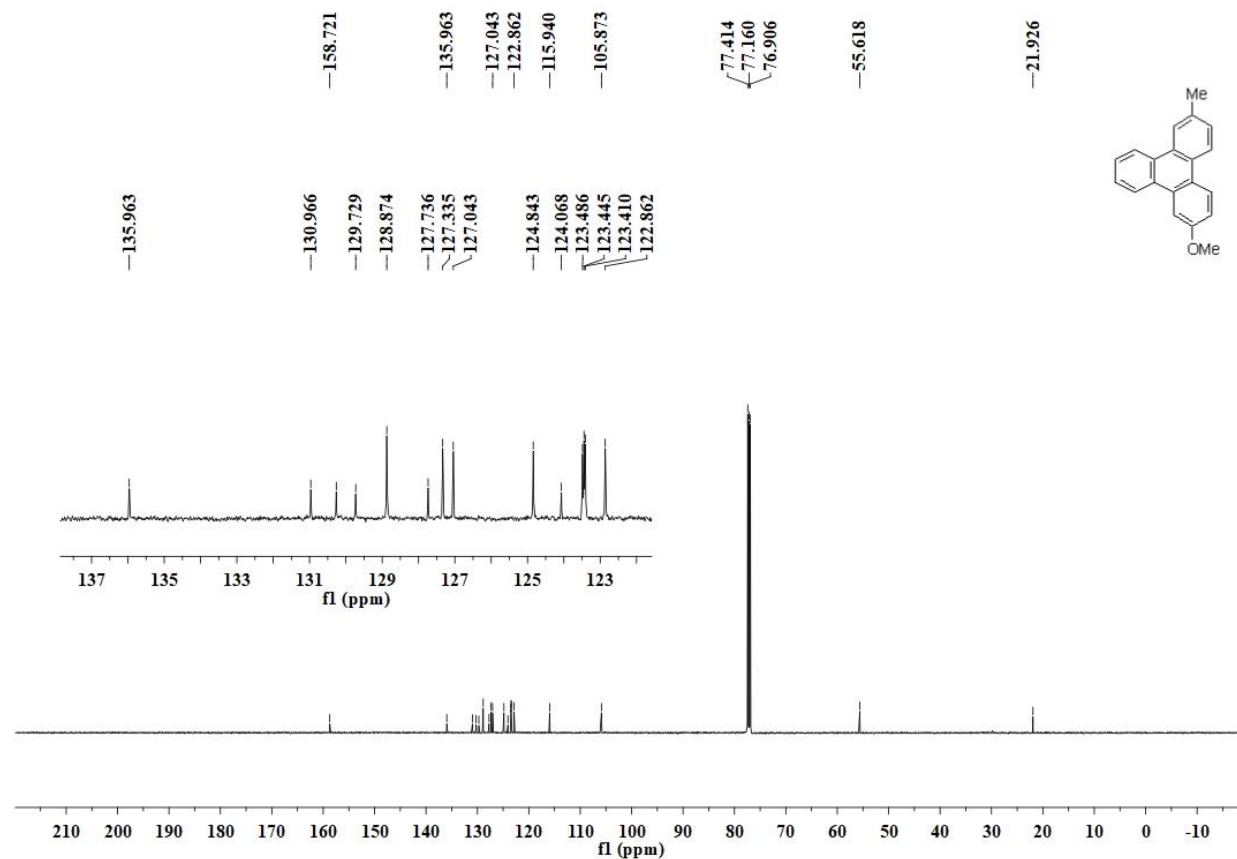



<sup>1</sup>H NMR (500 MHz, CDCl<sub>3</sub>) of **3n**

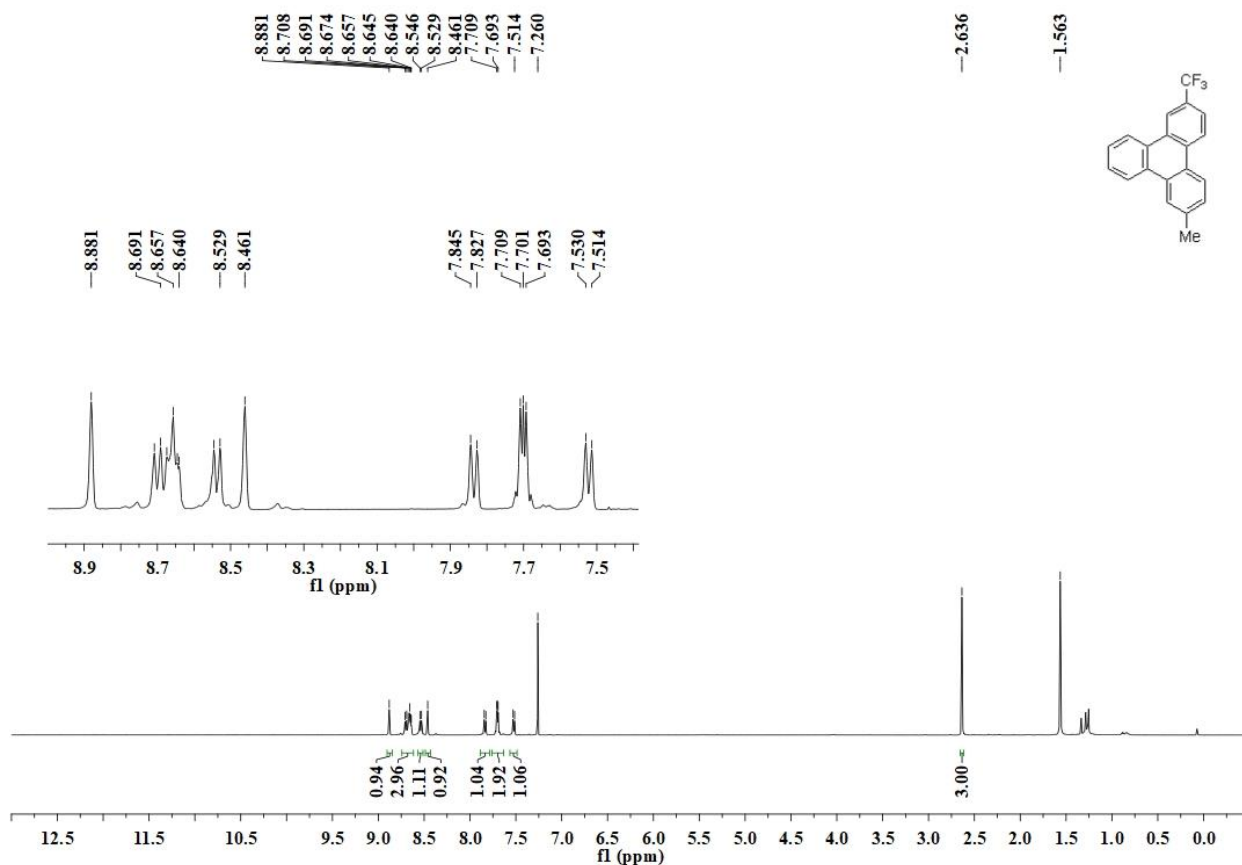

<sup>13</sup>C NMR (125 MHz, CDCl<sub>3</sub>) of **3n**

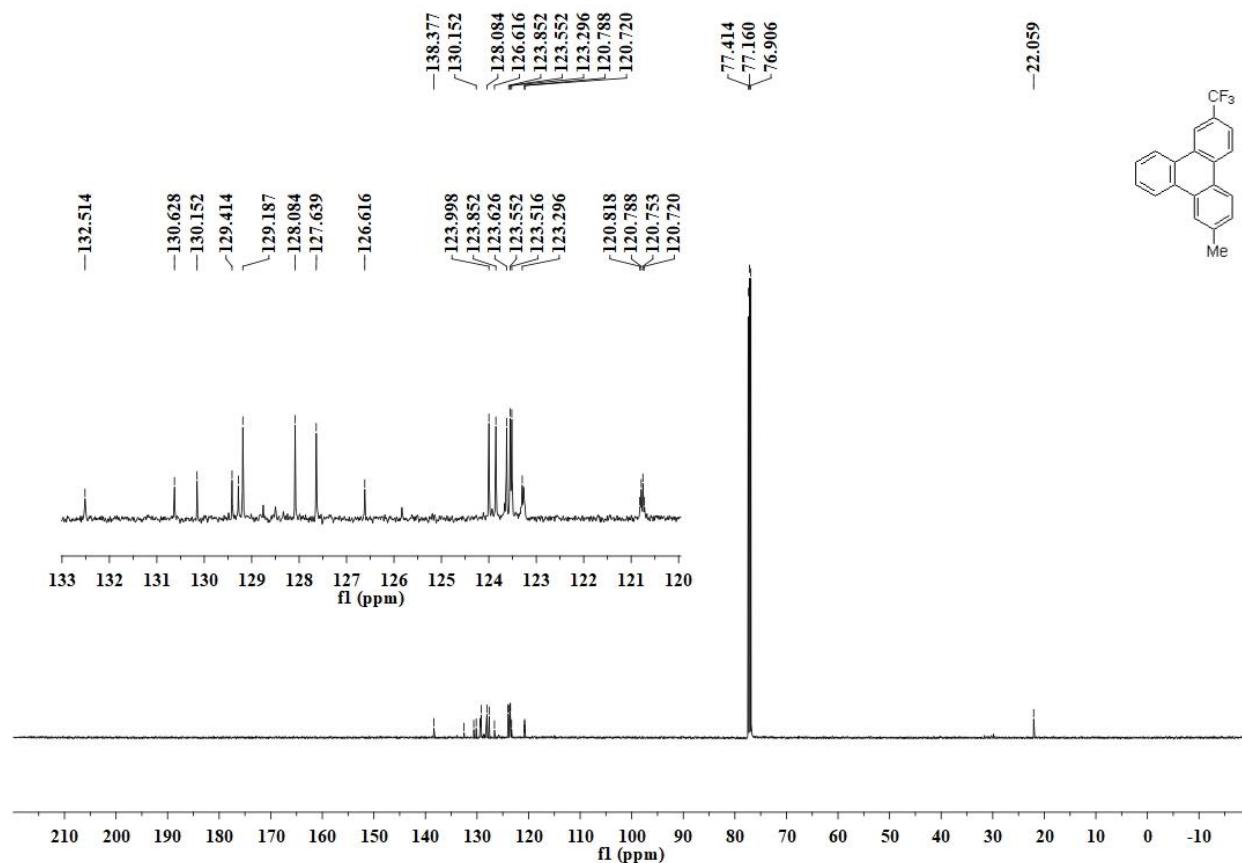

$^{19}\text{F}$  NMR (376 MHz,  $\text{CDCl}_3$ ) of **3n**

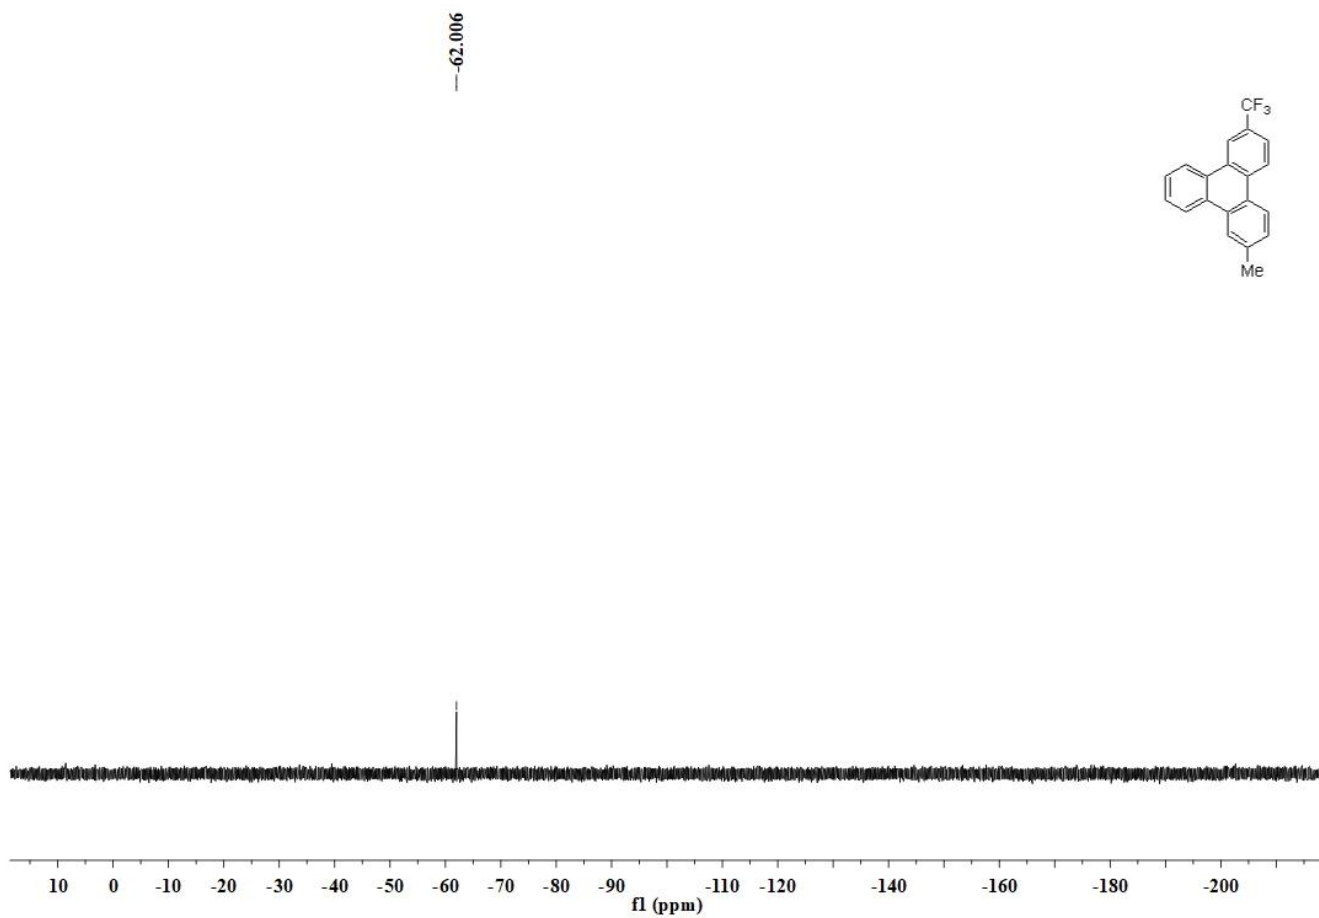

$^1\text{H}$  NMR (500 MHz,  $\text{CDCl}_3$ ) of **3o**

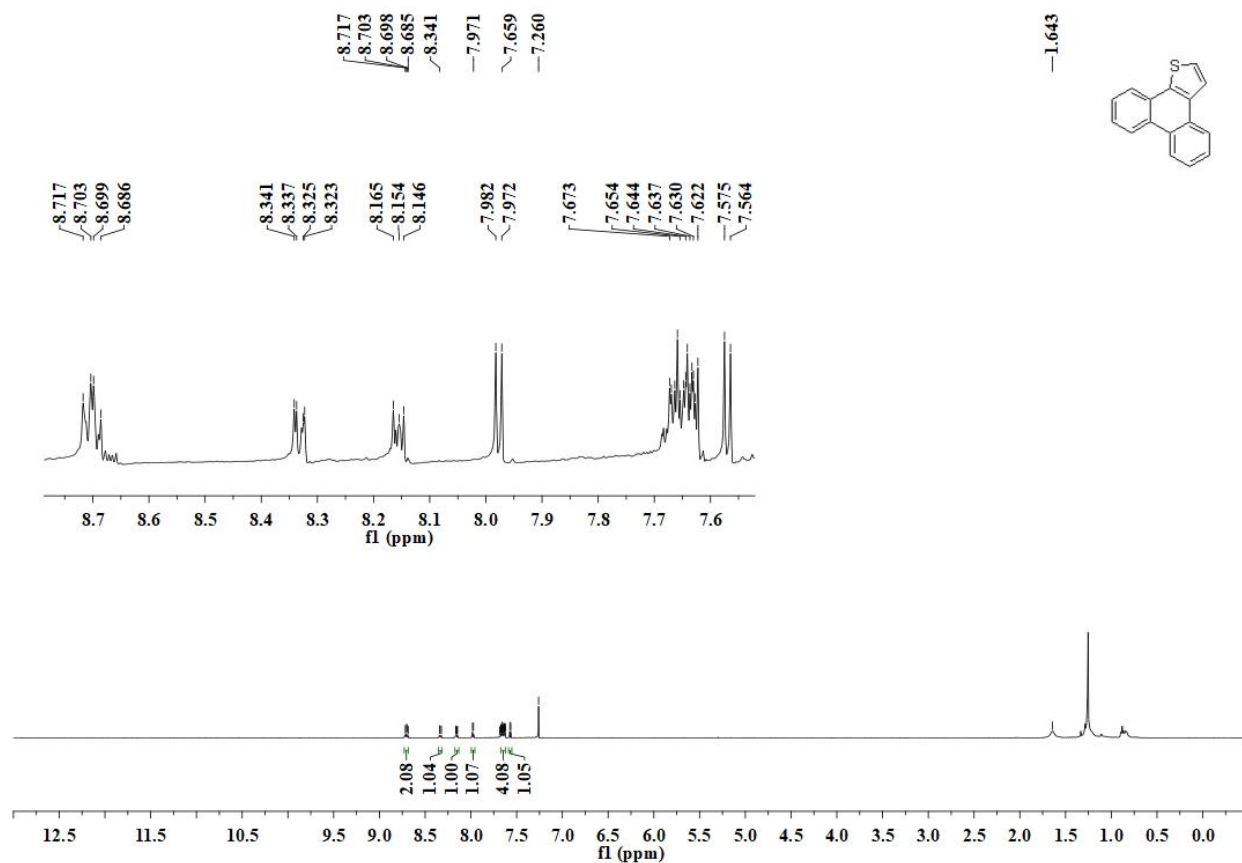

$^{13}\text{C}$  NMR (125 MHz,  $\text{CDCl}_3$ ) of **3o**

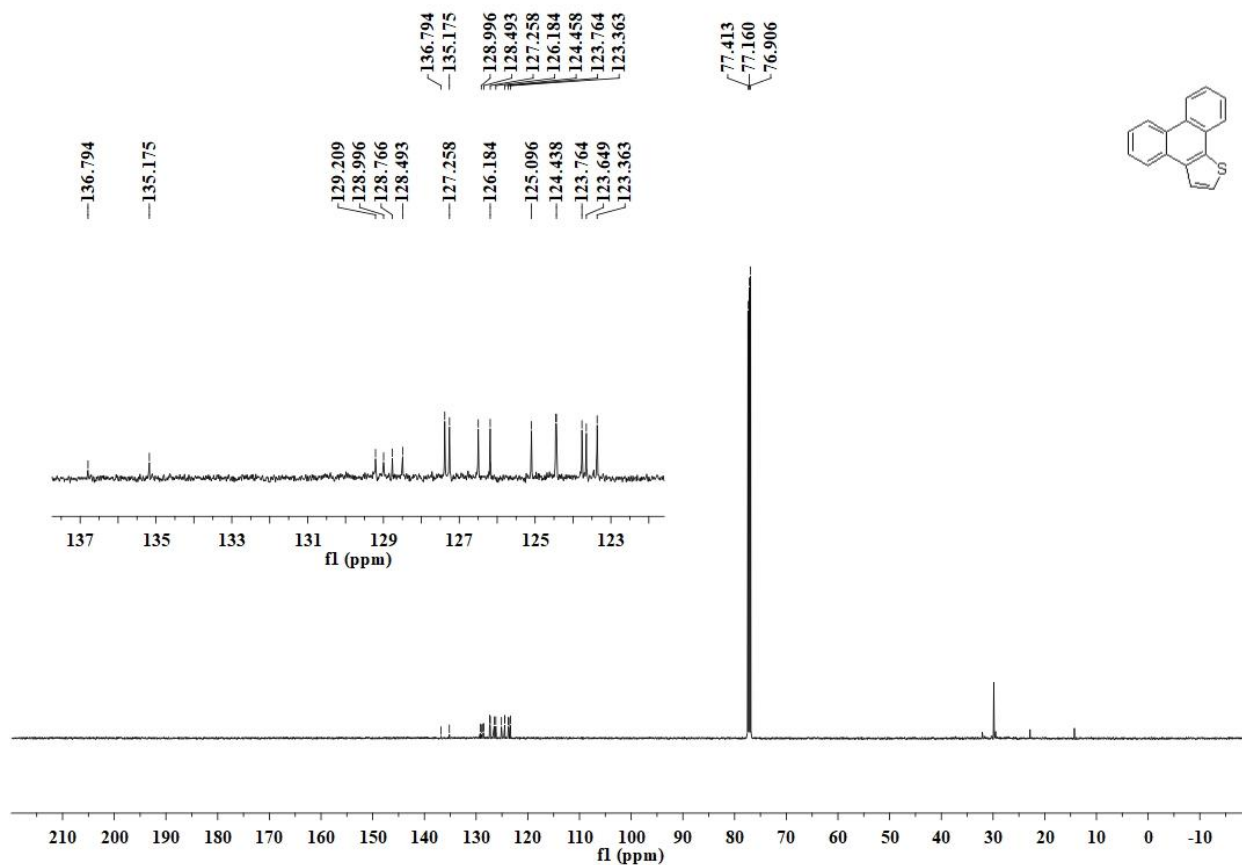

$^1\text{H}$  NMR (500 MHz,  $\text{CDCl}_3$ ) of **3p**

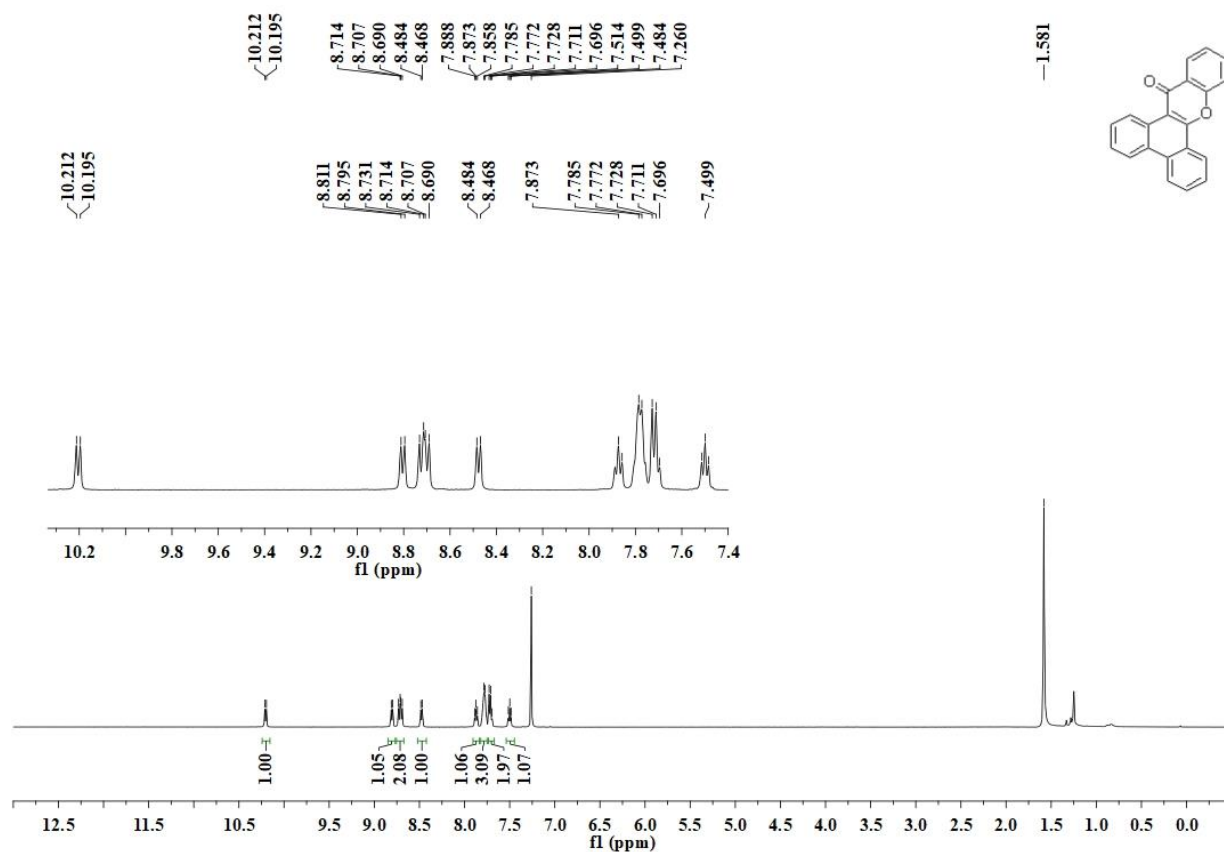

$^{13}\text{C}$  NMR (125 MHz,  $\text{CDCl}_3$ ) of **3p**

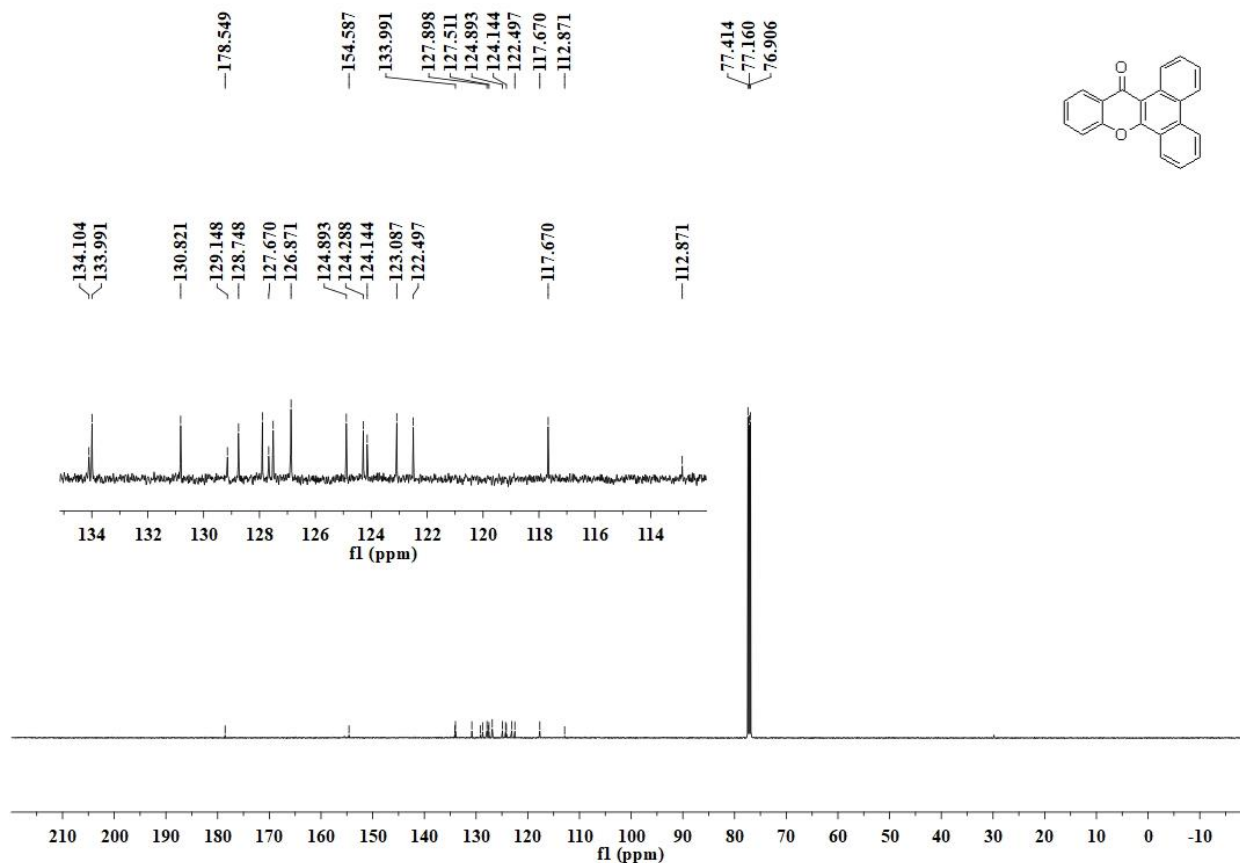

<sup>1</sup>H NMR (500 MHz, CDCl<sub>3</sub>) of **4b**

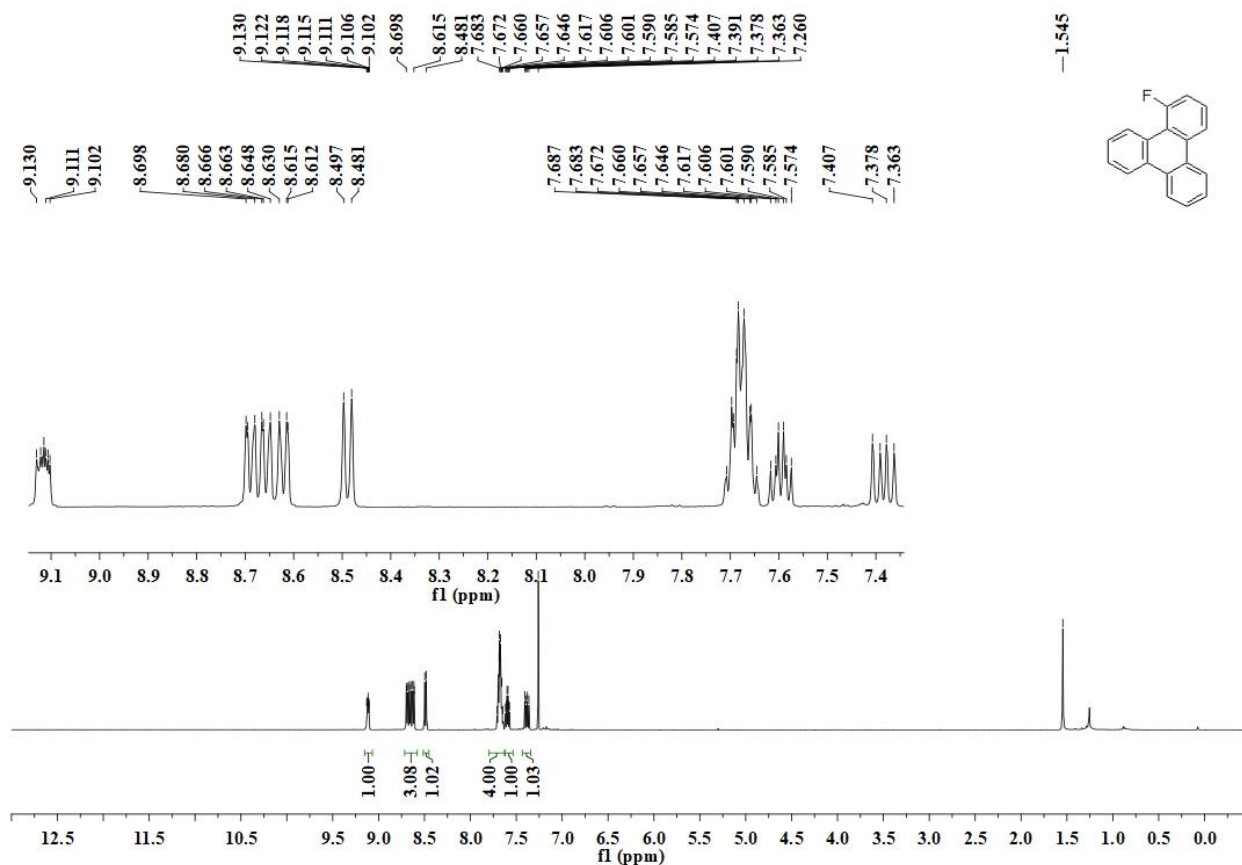

<sup>13</sup>C NMR (125 MHz, CDCl<sub>3</sub>) of **4b**

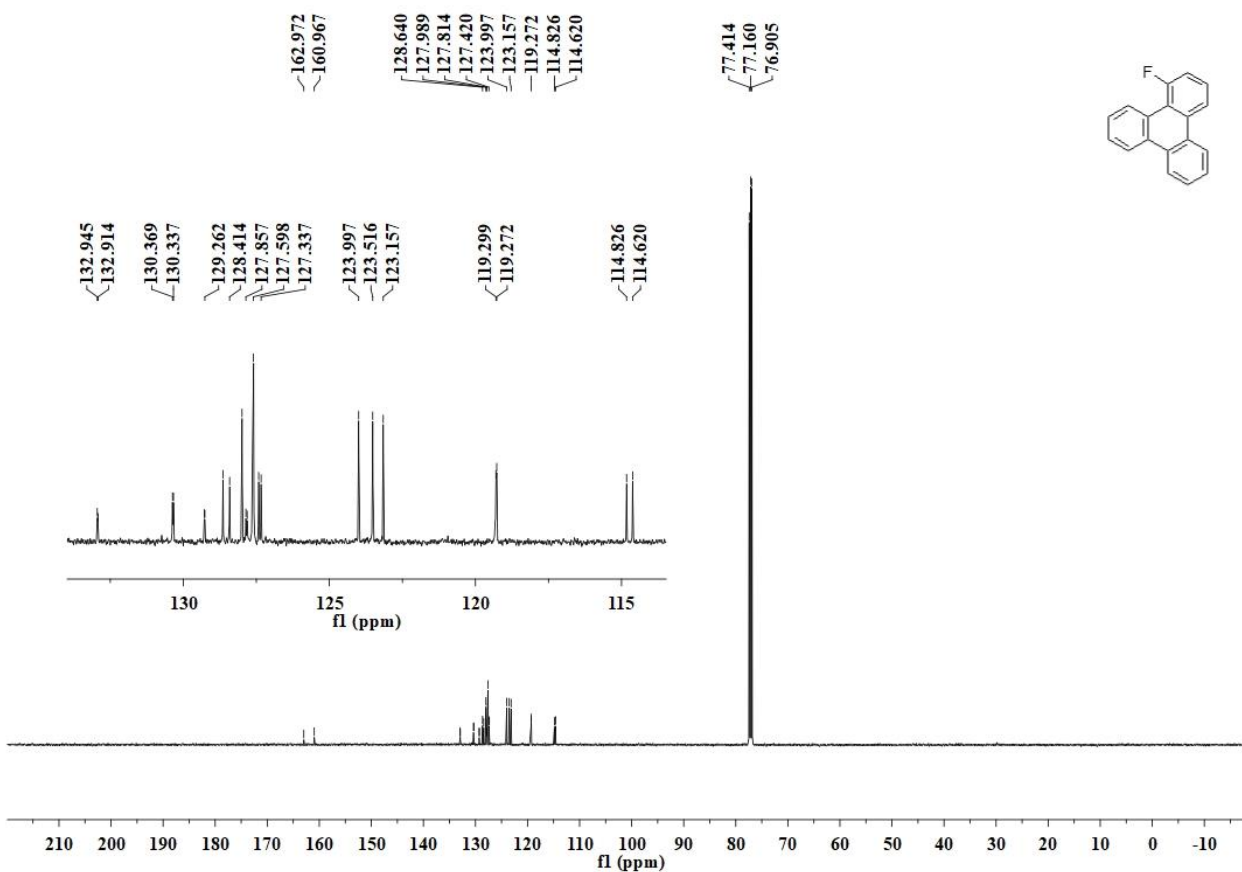

$^{19}\text{F}$  NMR (471 MHz,  $\text{CDCl}_3$ ) of **4b**

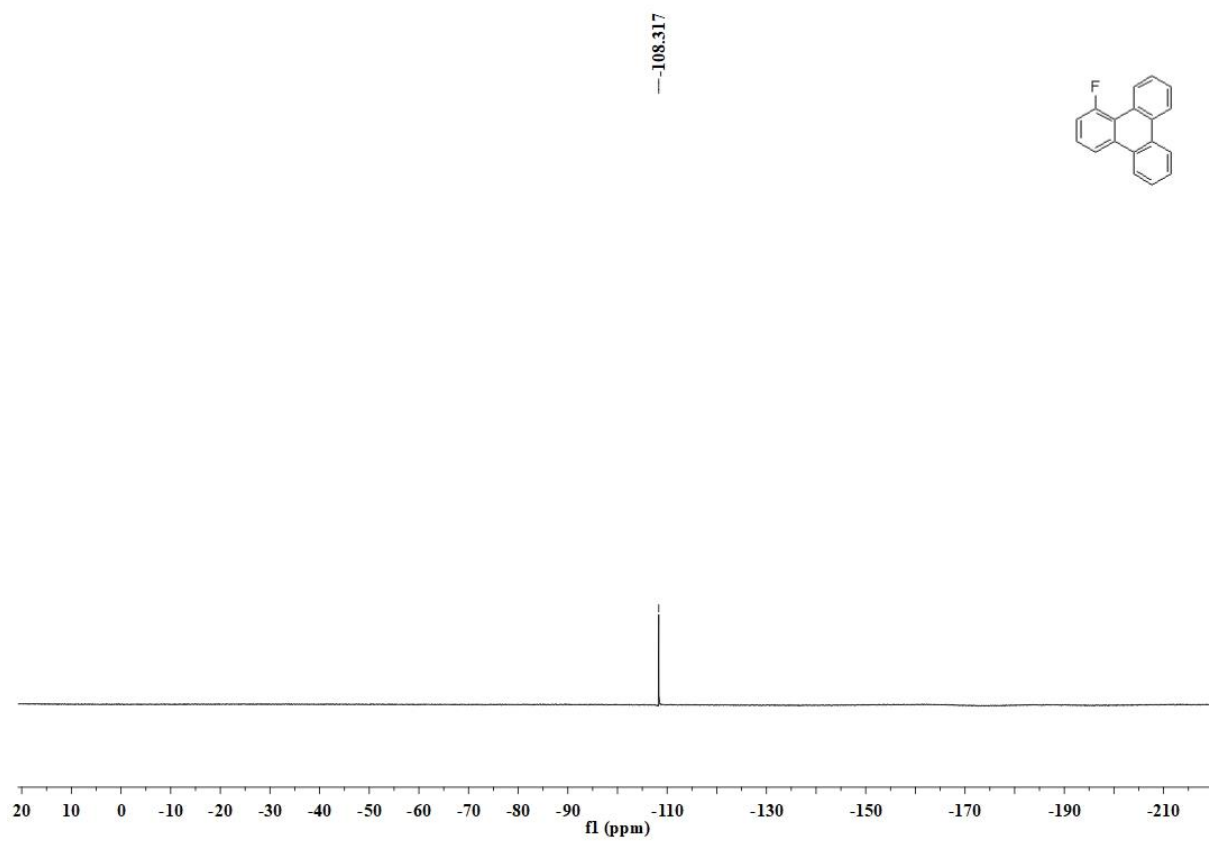

$^1\text{H}$  NMR (500 MHz,  $\text{CDCl}_3$ ) of **4c**

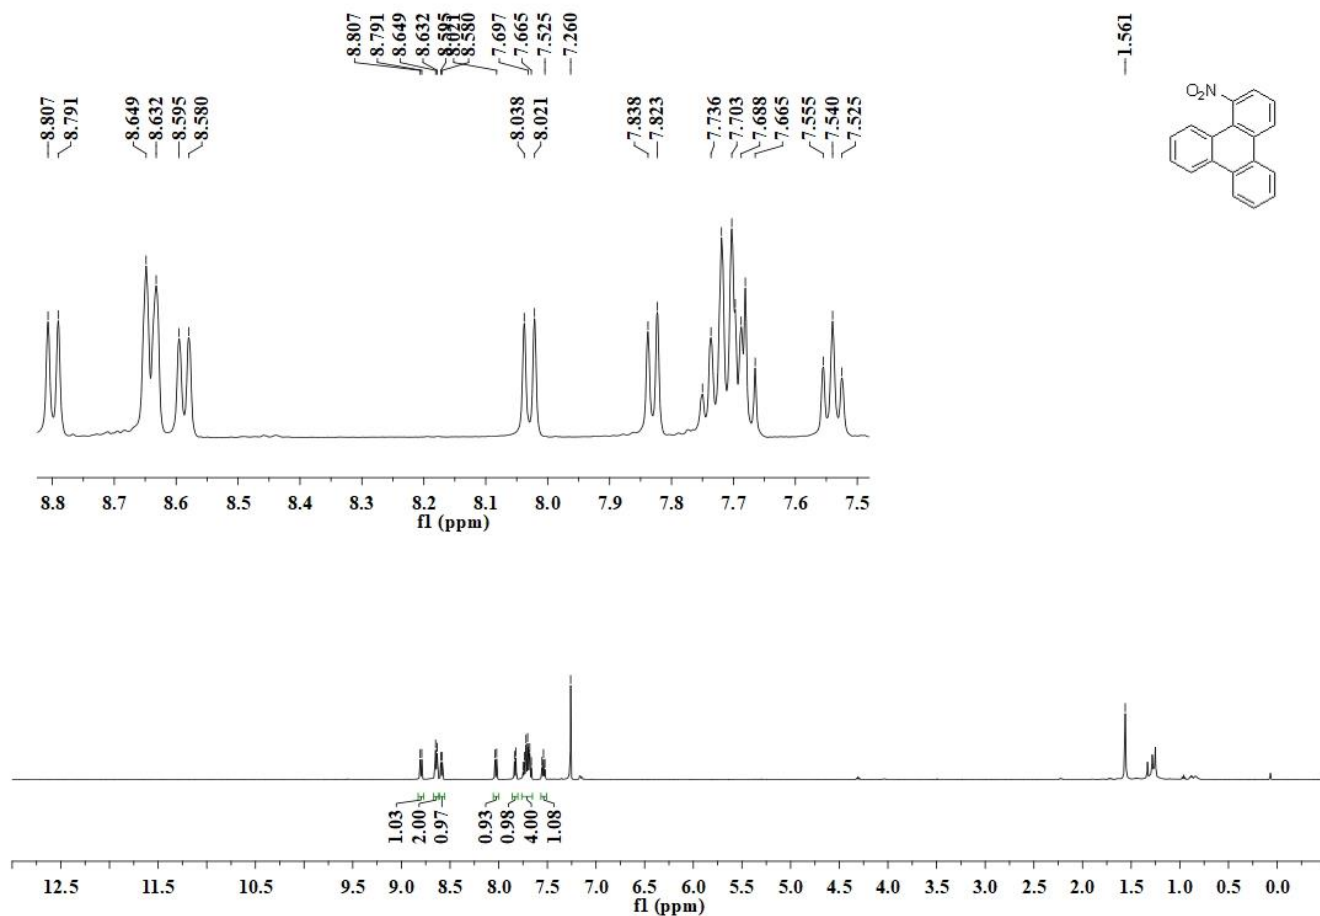

$^{13}\text{C}$  NMR (125 MHz,  $\text{CDCl}_3$ ) of **4c**

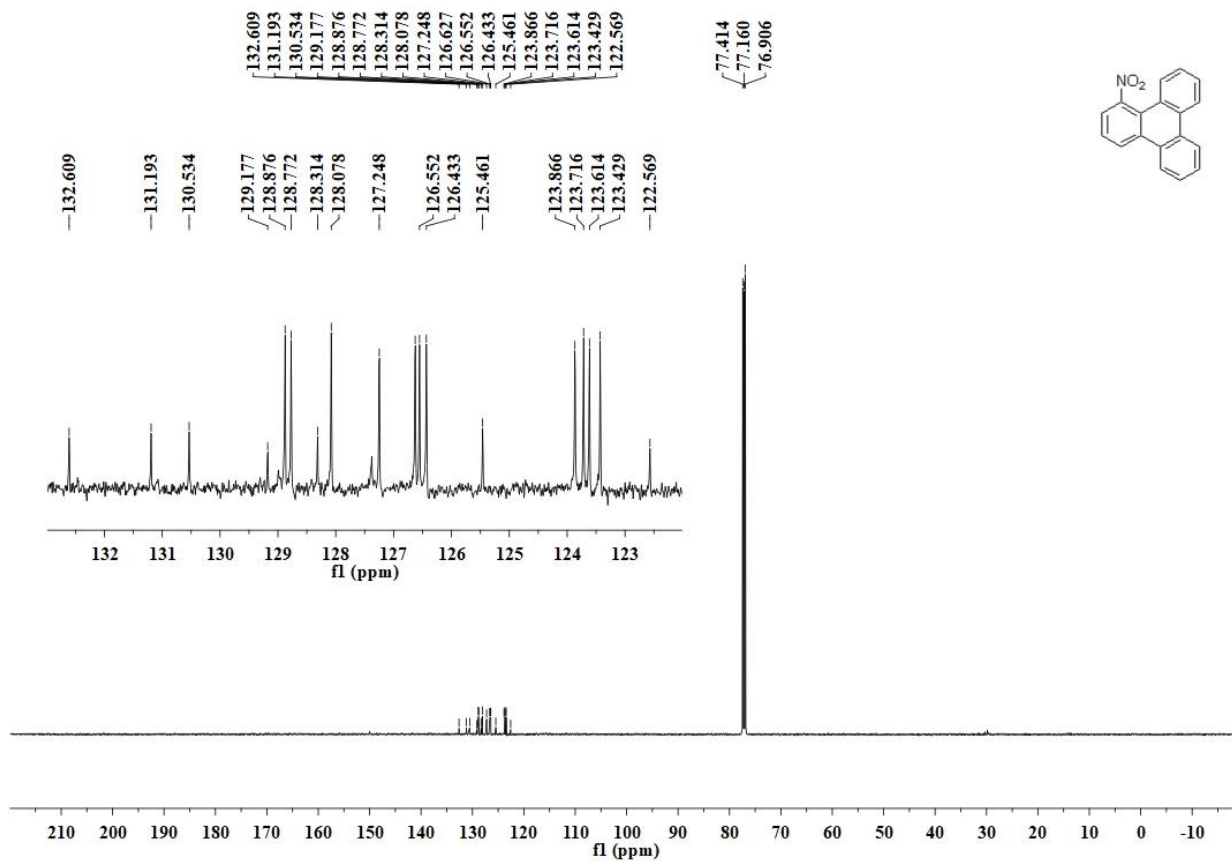

<sup>1</sup>H NMR (500 MHz, DMSO-*d*<sub>6</sub>) of **4d**

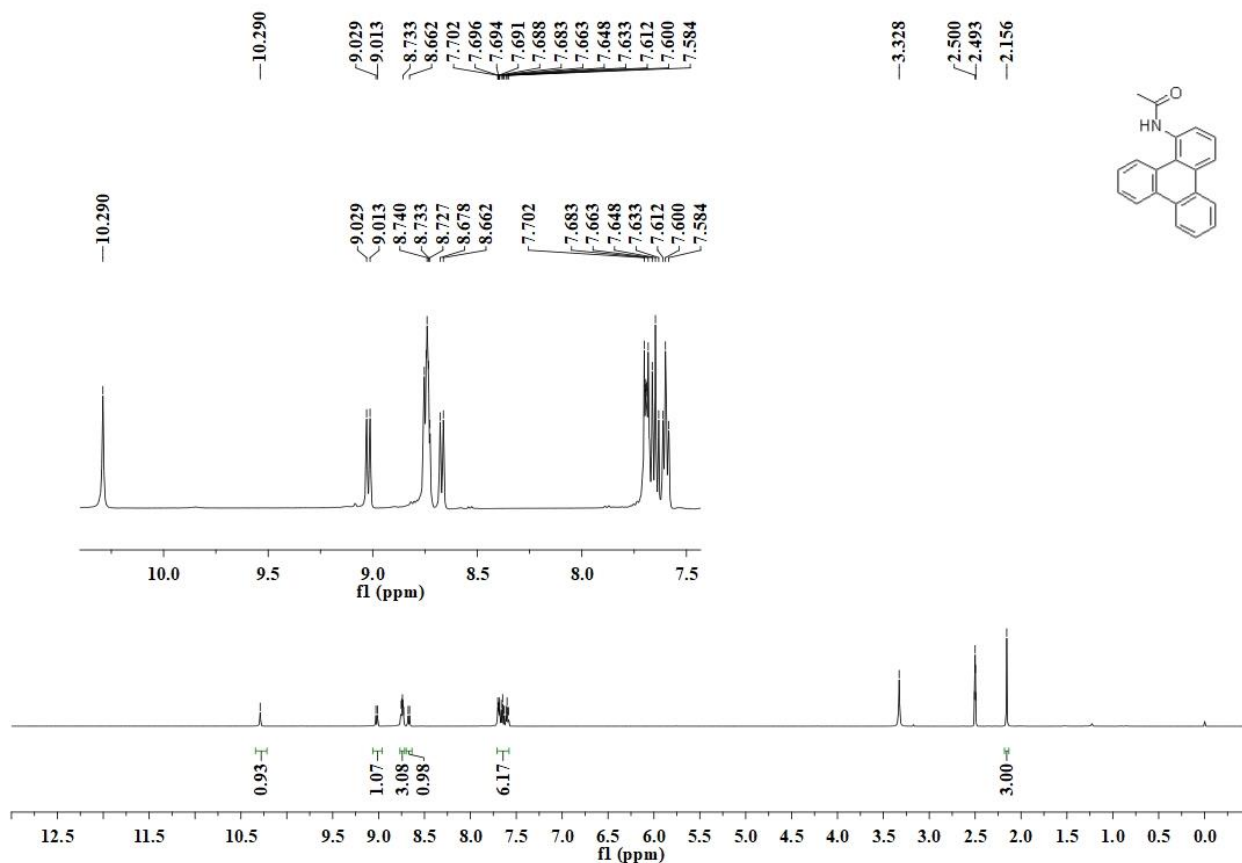

<sup>13</sup>C NMR (125 MHz, DMSO-*d*<sub>6</sub>) of **4d**

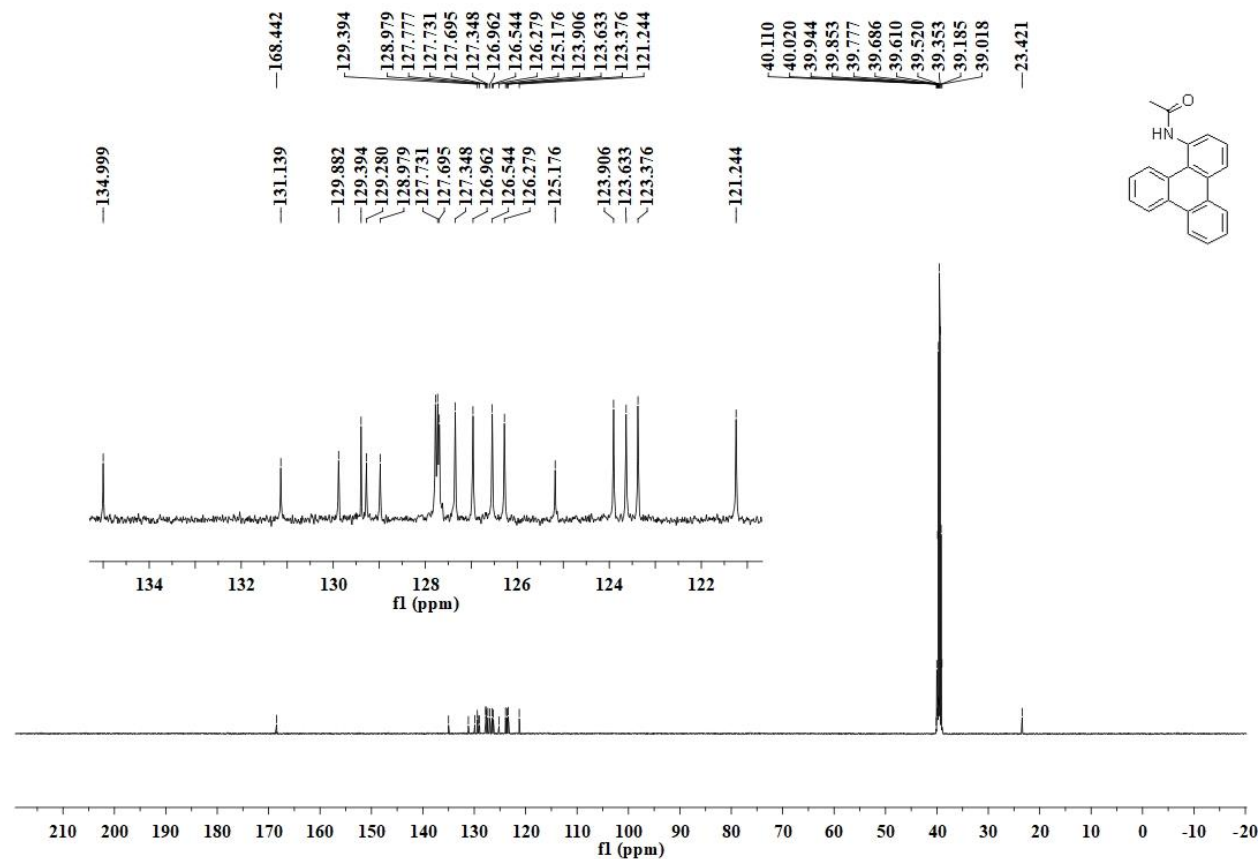



$^1\text{H}$  NMR (500 MHz,  $\text{CDCl}_3$ ) of **4h**

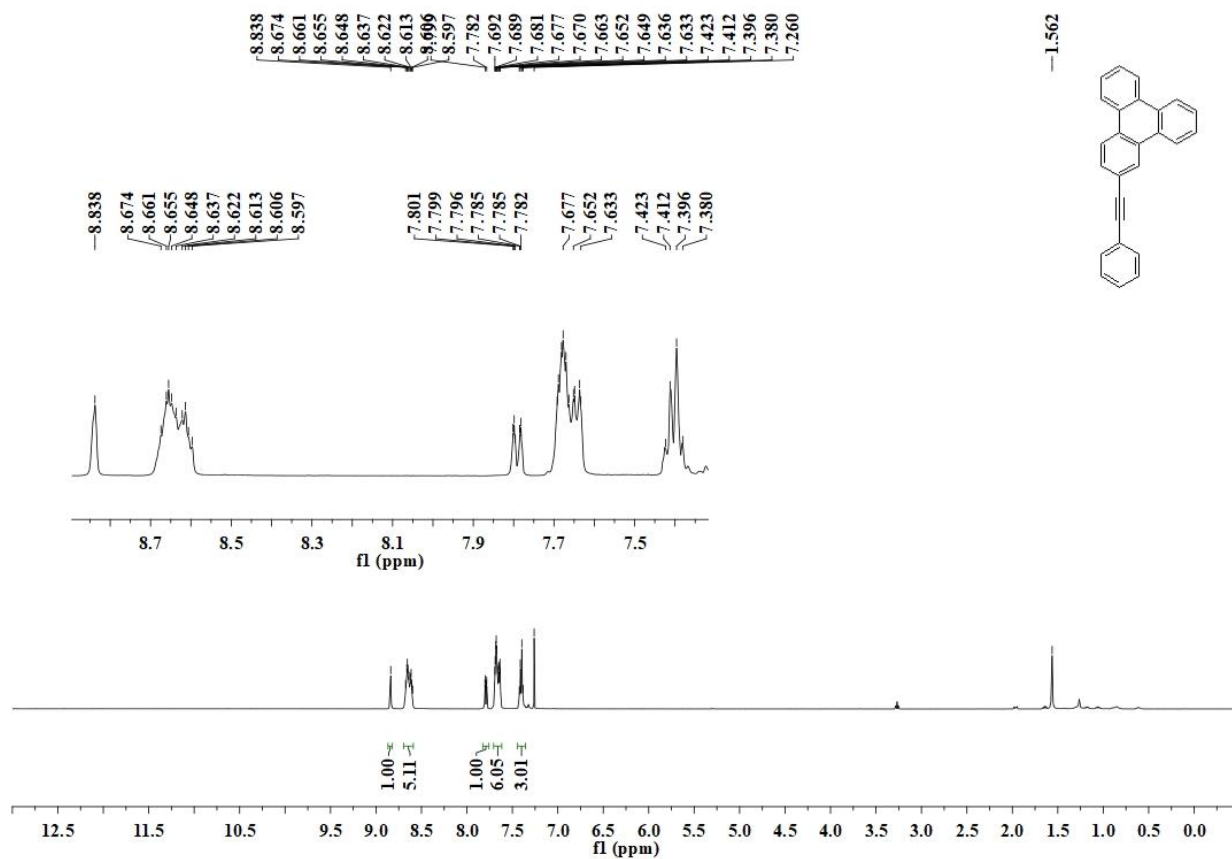

$^{13}\text{C}$  NMR (125 MHz,  $\text{CDCl}_3$ ) of **4h**

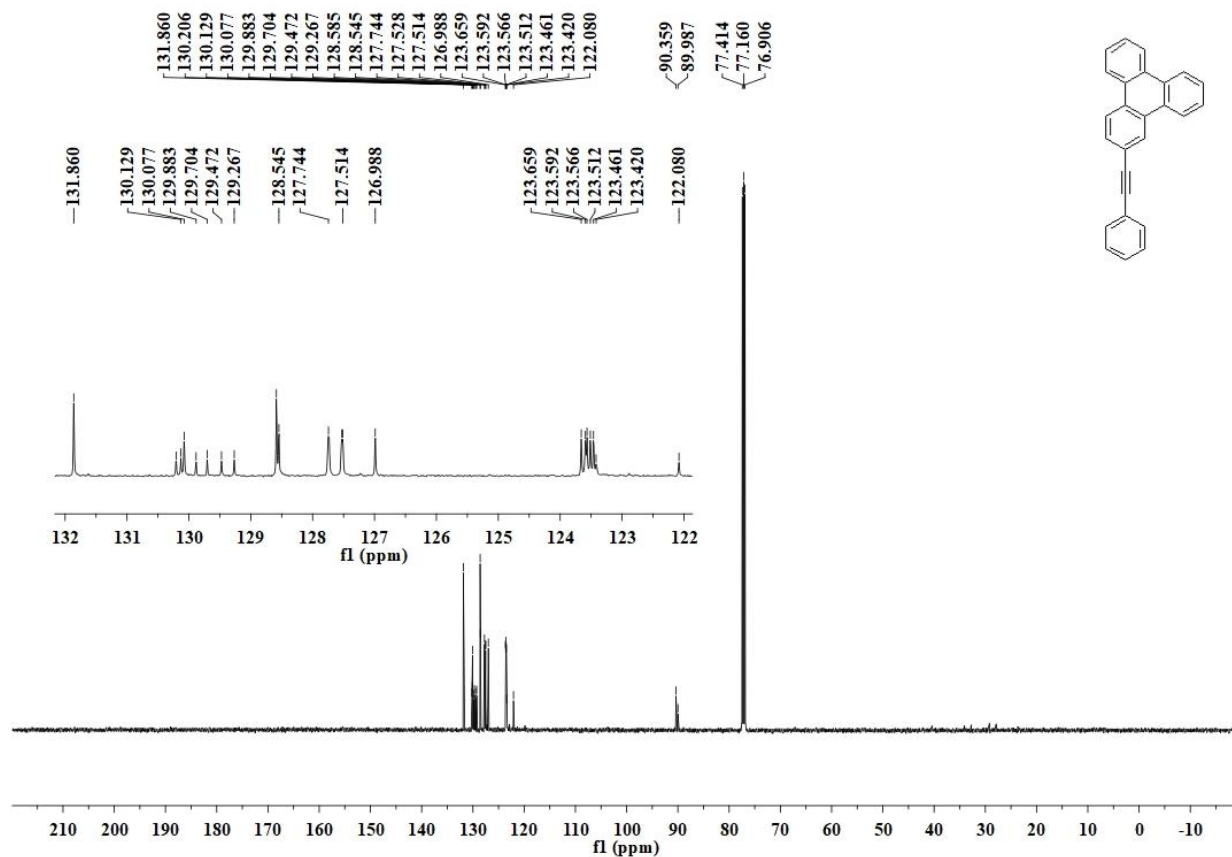

$^1\text{H}$  NMR (500 MHz,  $\text{CDCl}_3$ ) of **4j**

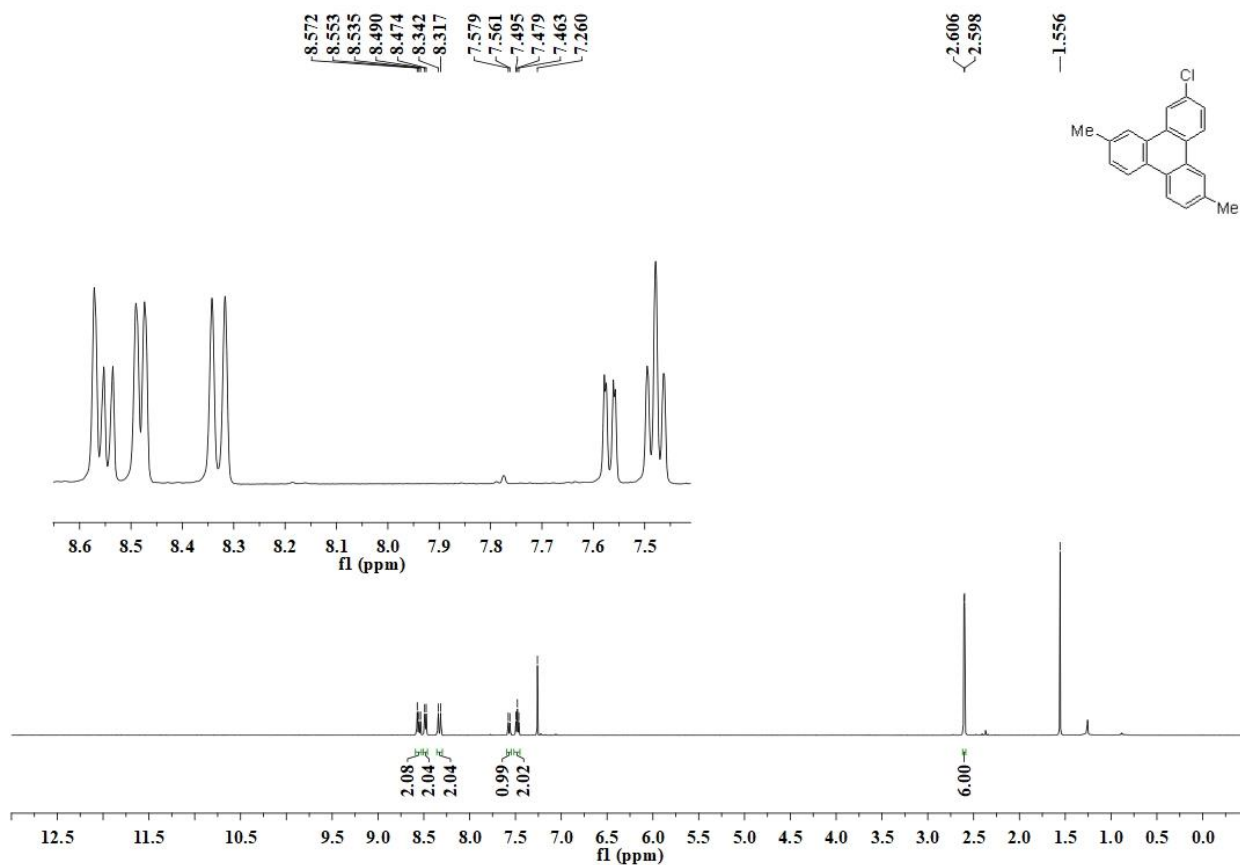

$^{13}\text{C}$  NMR (125 MHz,  $\text{CDCl}_3$ ) of **4j**

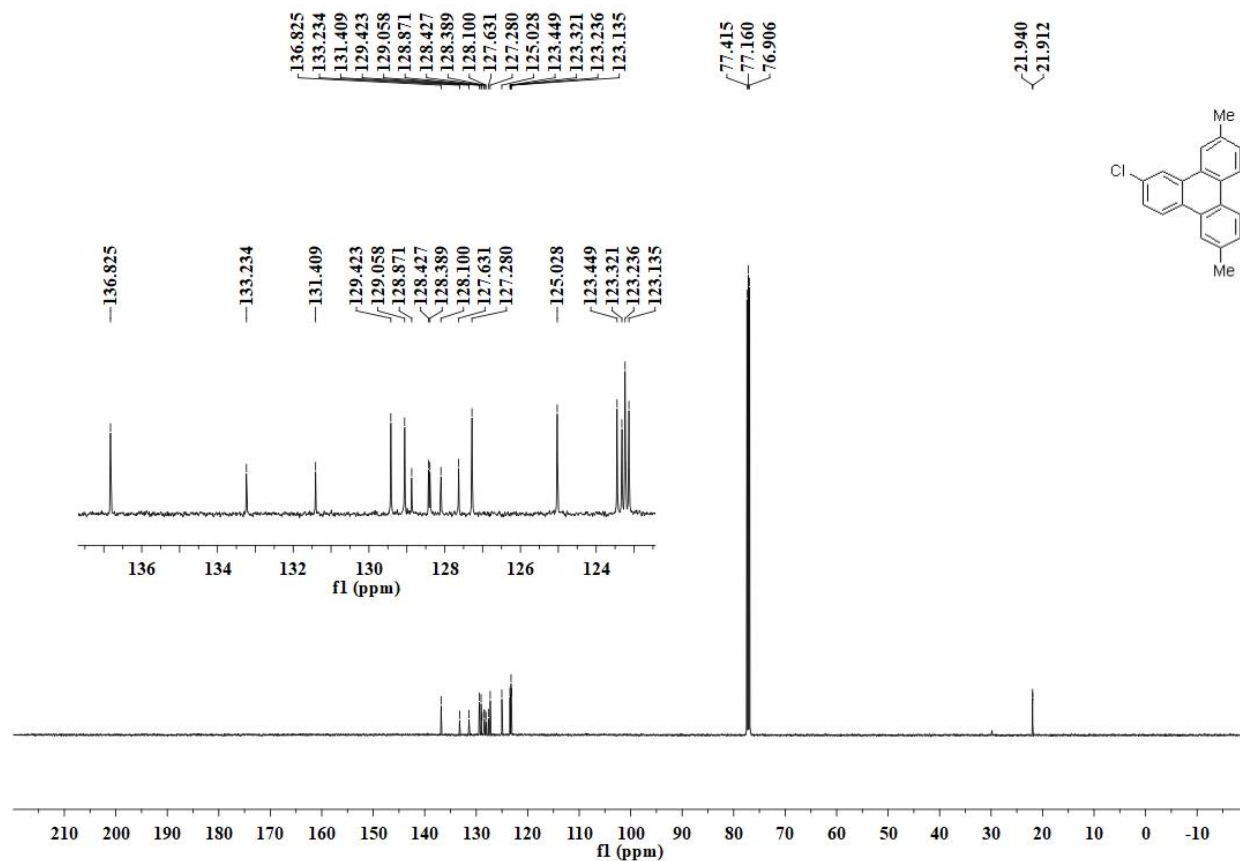

<sup>1</sup>H NMR (500 MHz, CDCl<sub>3</sub>) of **4k**

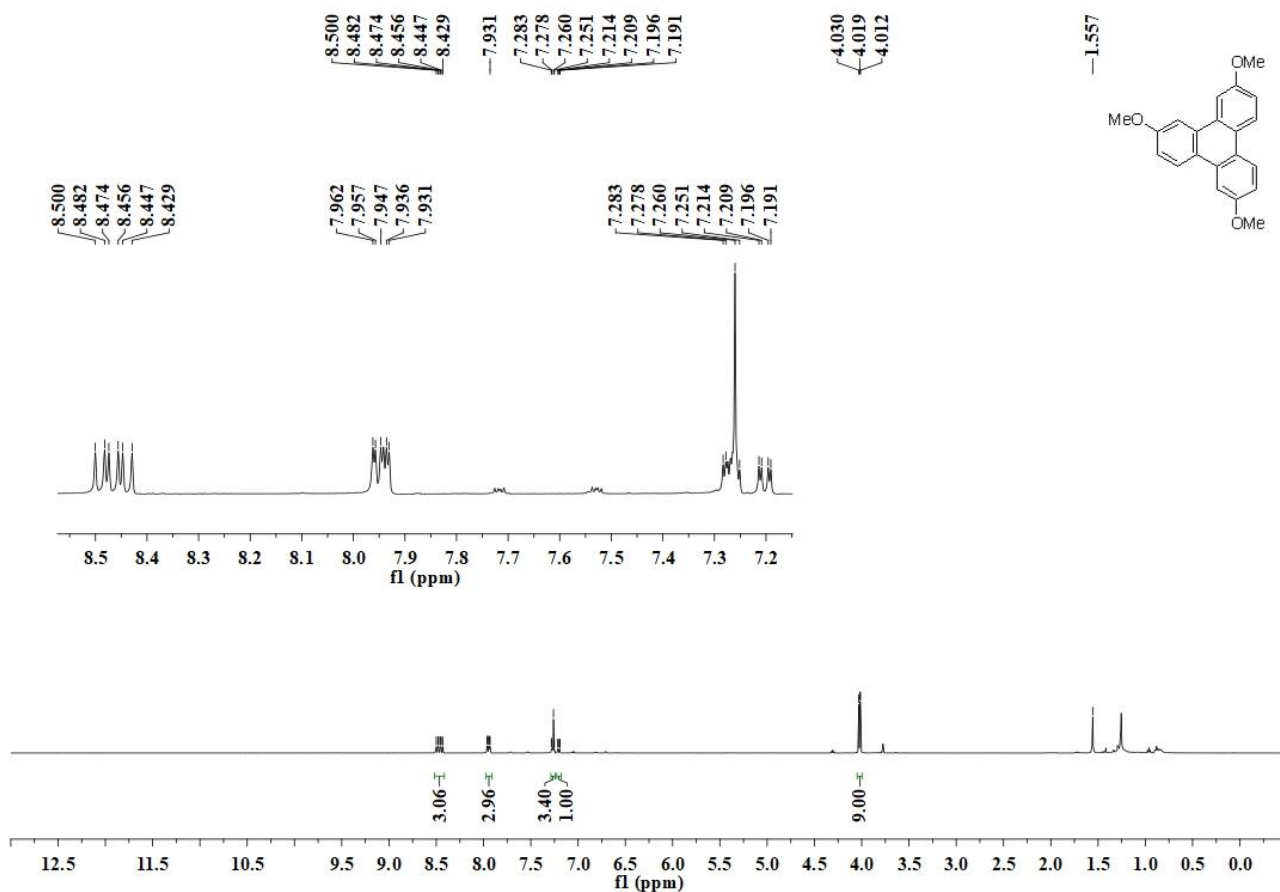

<sup>13</sup>C NMR (125 MHz, CDCl<sub>3</sub>) of **4k**

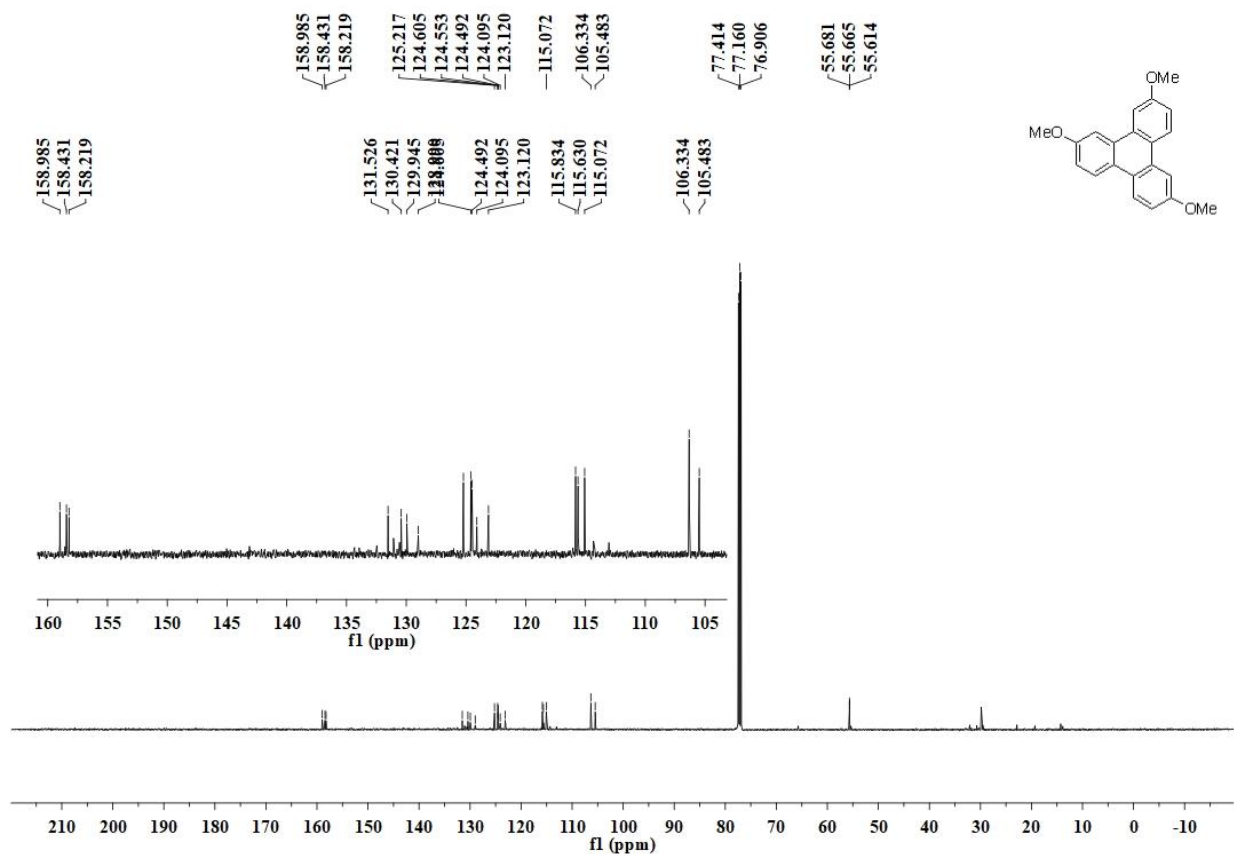

<sup>1</sup>H NMR (500 MHz, CDCl<sub>3</sub>) of **4I**

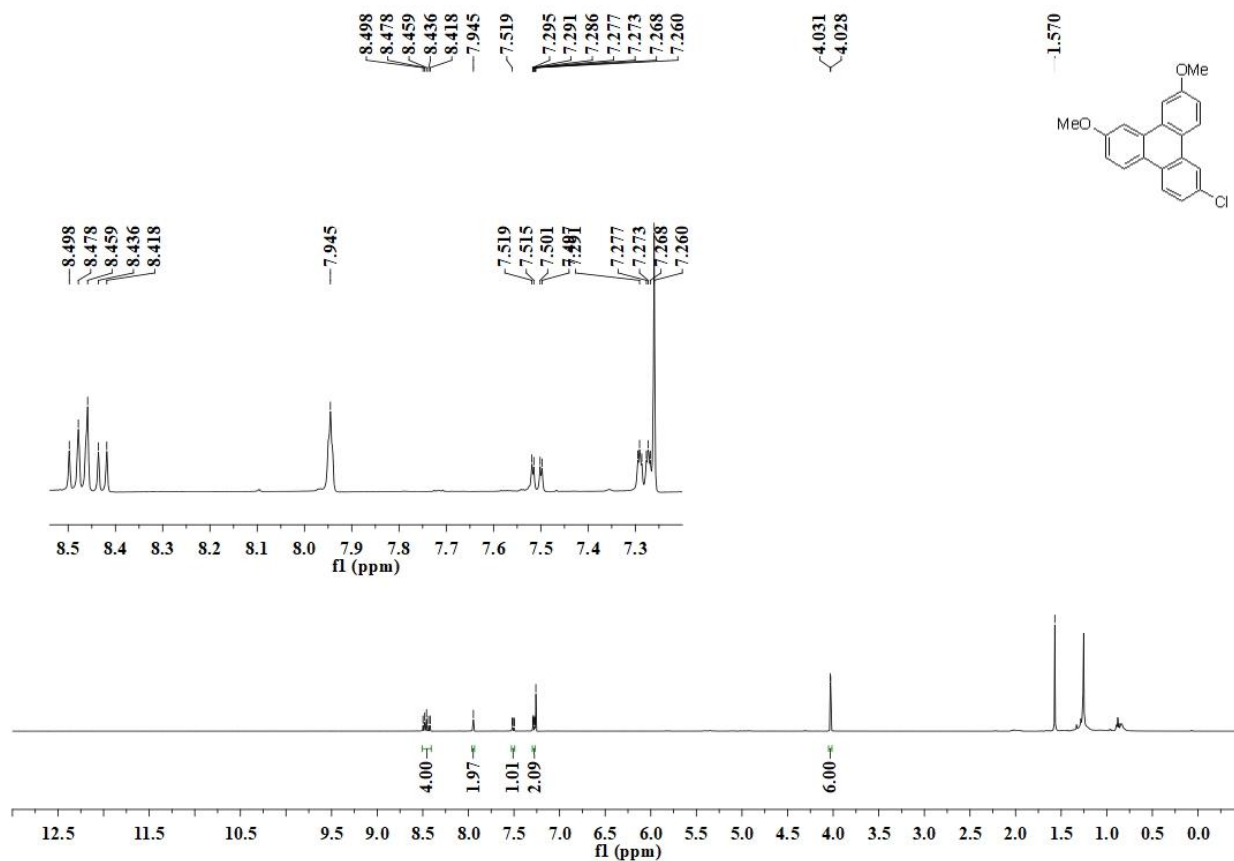

<sup>13</sup>C NMR (125 MHz, CDCl<sub>3</sub>) of **4I**

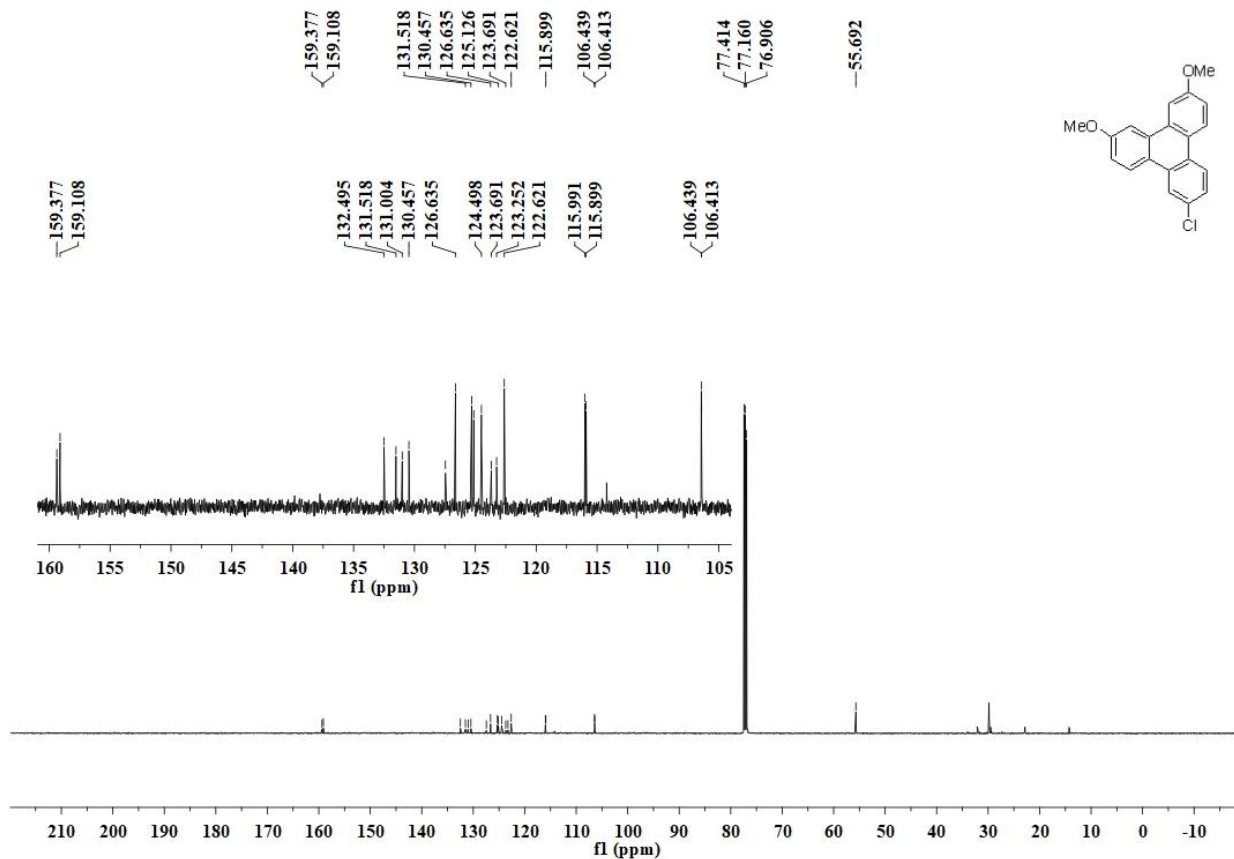

$^1\text{H}$  NMR (500 MHz,  $\text{CDCl}_3$ ) of **4m**

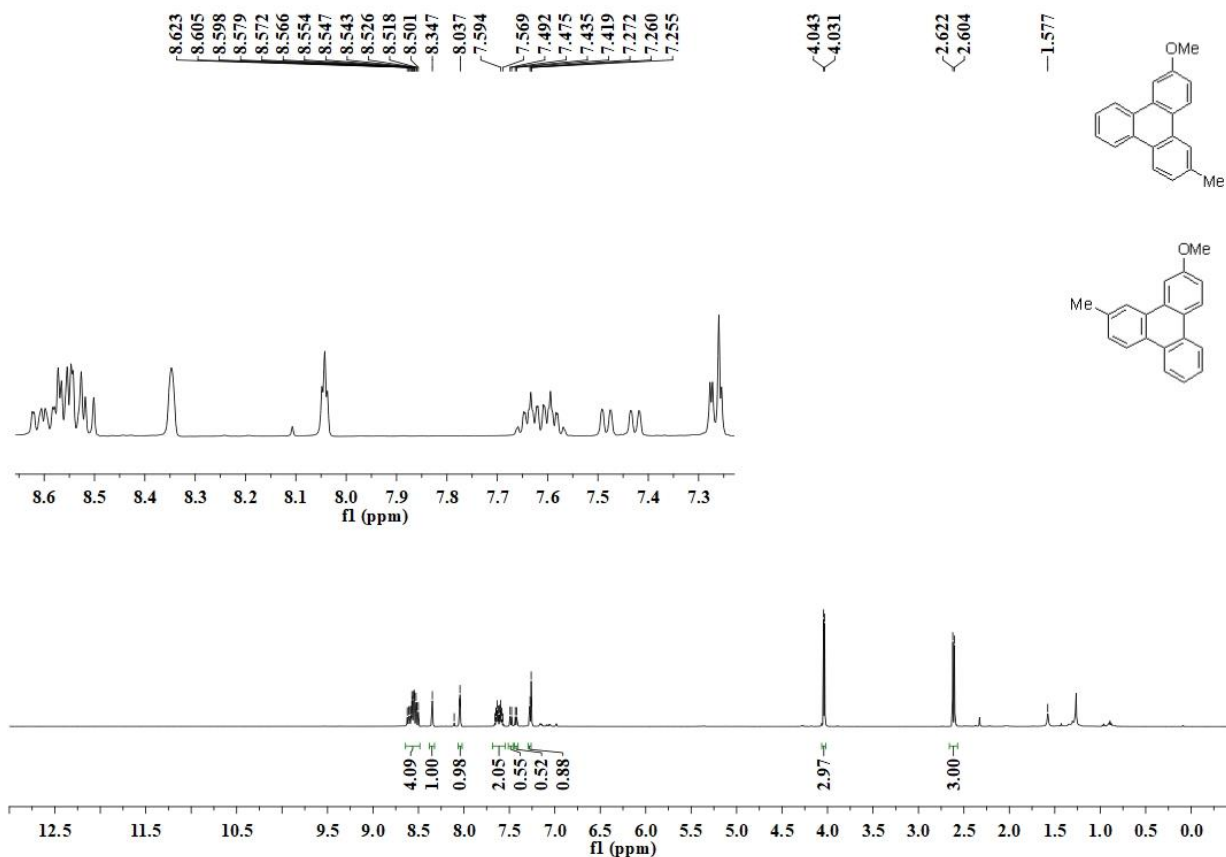

$^{13}\text{C}$  NMR (125 MHz,  $\text{CDCl}_3$ ) of **4m**

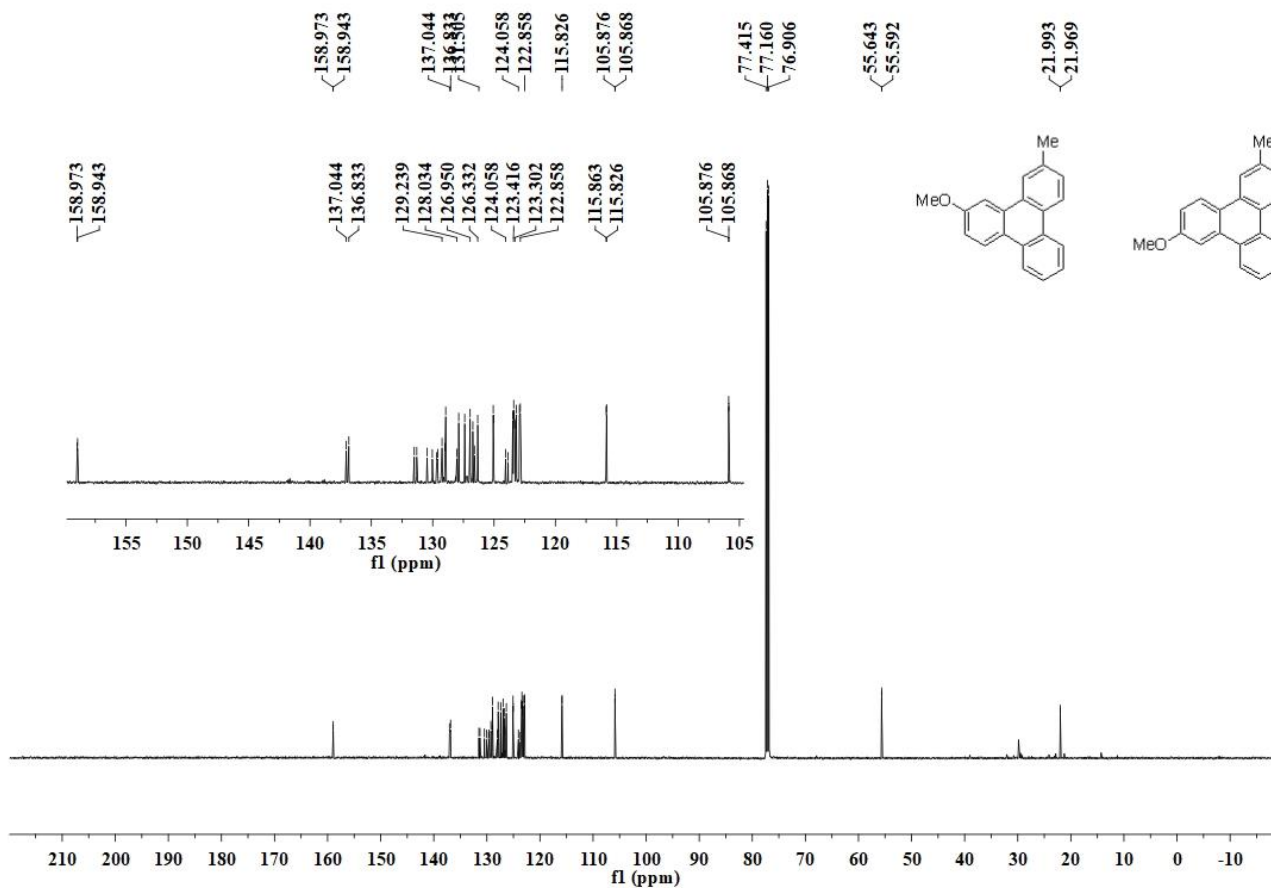

$^1\text{H}$  NMR (500 MHz,  $\text{CDCl}_3$ ) of **4n**

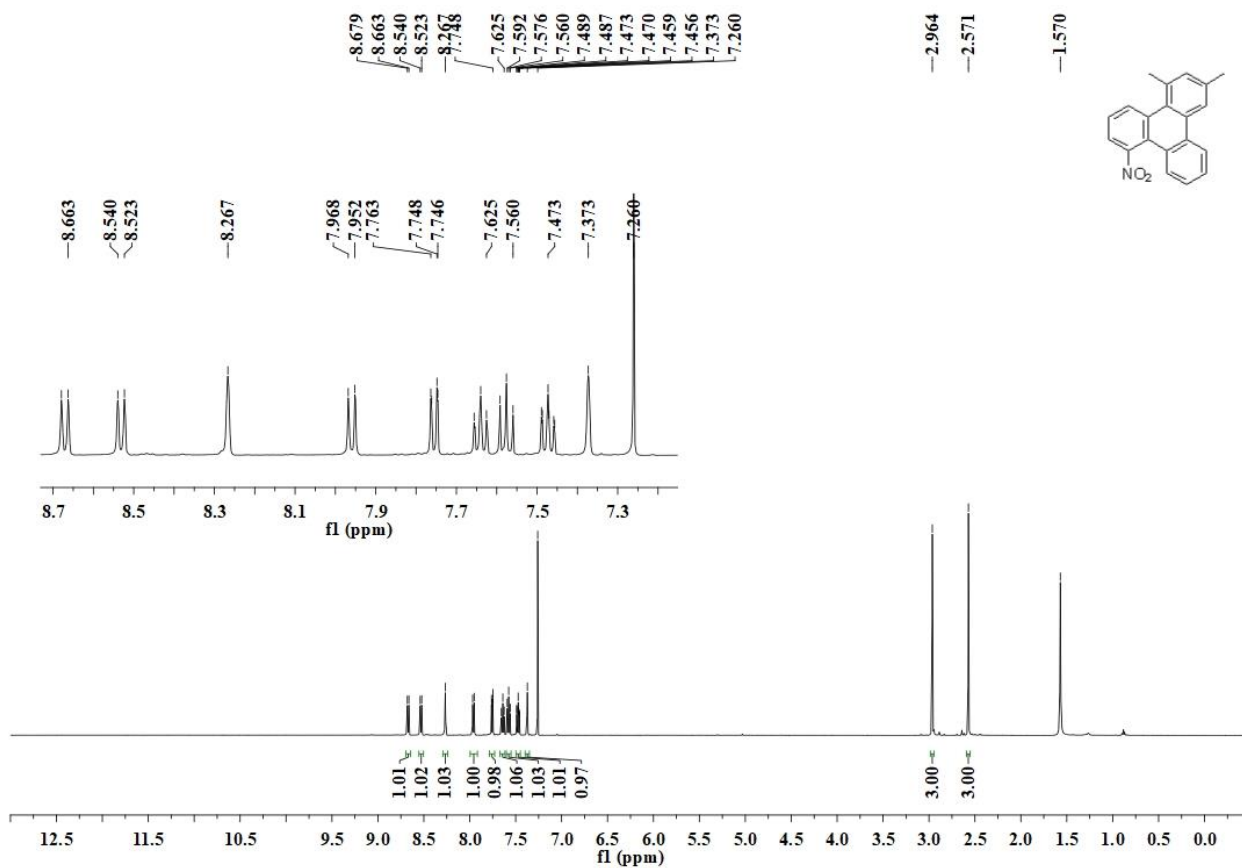

$^{13}\text{C}$  NMR (125 MHz,  $\text{CDCl}_3$ ) of **4n**

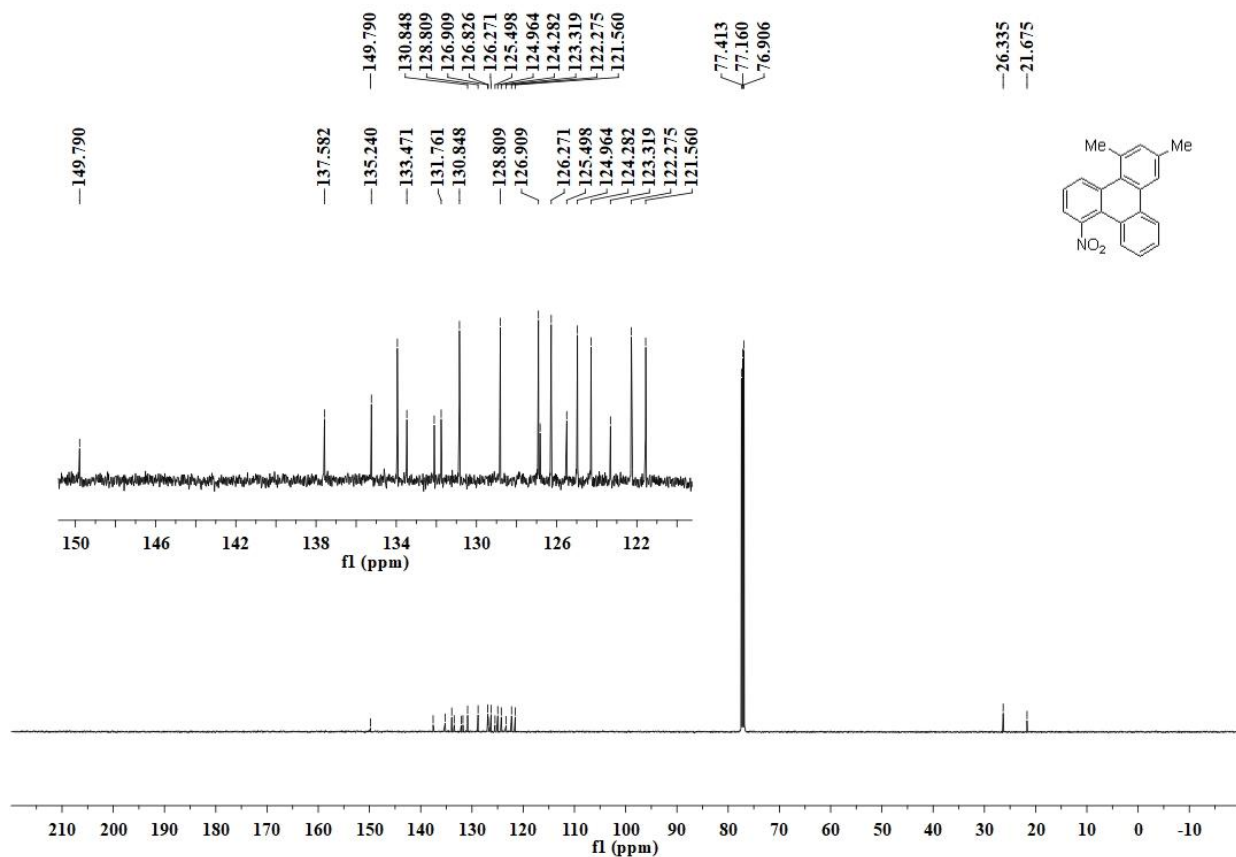

H-H NOESY (500 MHz, CDCl<sub>3</sub>) of **4n**

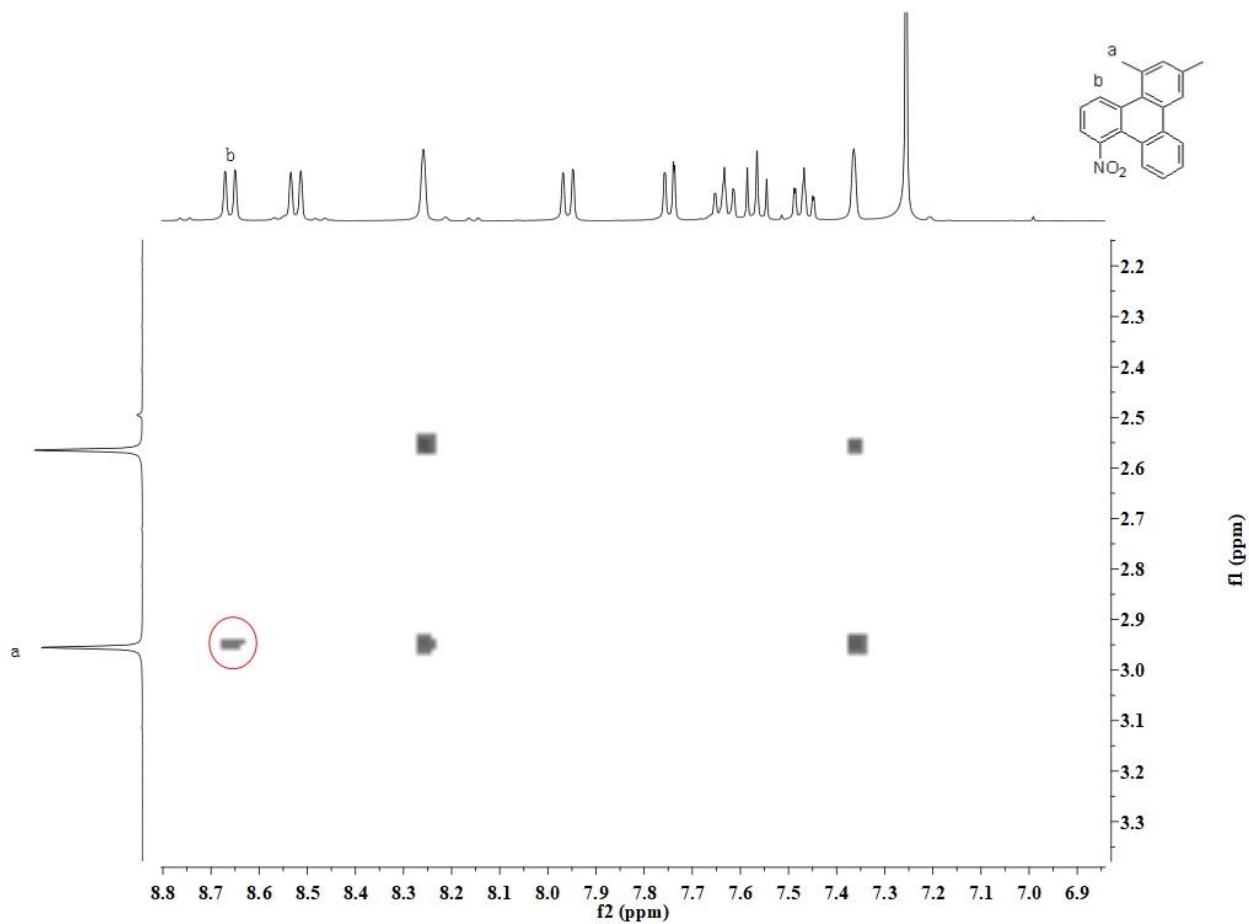

Supplement: d2ob00500j1.pdf [file d2ob00500j1.pdf]
